# Supplementary material for: On the radiation belt location in the 23–24 solar cycles
Source: Copernicus journal article supplement (doi:10.5194/angeo-2018-118), 2018-11-15

# **On the radiation belt location in the 23 – 24 solar cycles**

A. V. Dmitriev<sup>1,2</sup>

1Institute of Space Science, National Central University, Jhongli,  
Taiwan,

2Skobeltsyn Institute of Nuclear Physics, Lomonosov Moscow State  
University, Moscow, Russia

Corresponding author: Alexei Dmitriev ([dalex@jupiter.ss.ncu.edu.tw](mailto:dalex@jupiter.ss.ncu.edu.tw))

Contents of this file

Caption Set SW

Caption Set map030

Caption Set map100

Caption Set map300

Additional Supporting Information

Set SW

Set map030

Set map100

Set map300

Set SW. Solar wind and geomagnetic conditions for the quiet days. Panels from top to bottom: solar wind bulk velocity  $V$ ; solar wind dynamic pressure  $P_d$ ; interplanetary magnetic field magnitude  $B$  (blue dotted curve) and  $B_z$  component (black solid curve); auroral electrojet index  $AE$ ; storm-time  $Dst$  index. The day on June, indicated by vertical red dashed lines, is very quiet in the solar wind and geomagnetic parameters.

Upstream solar wind data are acquired from Wind upstream monitor (<https://cdaweb.sci.gsfc.nasa.gov/index.html/>)  
Geomagnetic parameters  $AE$  and  $Dst$  are provided by Kyoto WDC (<http://wdc.kugi.kyoto-u.ac.jp/wdc/Sec3.html>)

Set map030. Geographic maps of averaged electron fluxes with energies  $>30$  keV and pitch angles of  $\sim 90^\circ$  observed during quiet days by POES satellites at height of  $\sim 850$  km in 2 hour vicinity of local noon. The solid wide curve indicates the geomagnetic equator. The outer and inner electron belts and a slot region between them are clearly seen, respectively, at high and middle latitudes in the longitudinal range from  $\sim 90^\circ$  E to  $\sim 80^\circ$  W.

The POES data are provided by NOAA (<https://www.ngdc.noaa.gov/stp/satellite/poes/dataaccess.html>)

Set map100. Geographic maps of averaged electron fluxes with energies  $>100$  keV and pitch angles of  $\sim 90^\circ$  observed quiet days by POES satellites at height of  $\sim 850$  km in 2 hour vicinity of local noon. The solid wide curve indicates the geomagnetic equator. The outer and inner electron belts and a slot region between them are clearly seen, respectively, at high and middle latitudes in the longitudinal range from  $\sim 90^\circ$  E to  $\sim 80^\circ$  W.

The POES data are provided by NOAA (<https://www.ngdc.noaa.gov/stp/satellite/poes/dataaccess.html>)

Set map300. Geographic maps of averaged electron fluxes with energies  $>300$  keV and pitch angles of  $\sim 90^\circ$  observed quiet days by POES satellites at height of  $\sim 850$  km in 2 hour vicinity of local noon. The solid wide curve indicates the geomagnetic equator. The outer electron belt is clearly seen at high latitudes.

The POES data are provided by NOAA (<https://www.ngdc.noaa.gov/stp/satellite/poes/dataaccess.html>)

W1010628

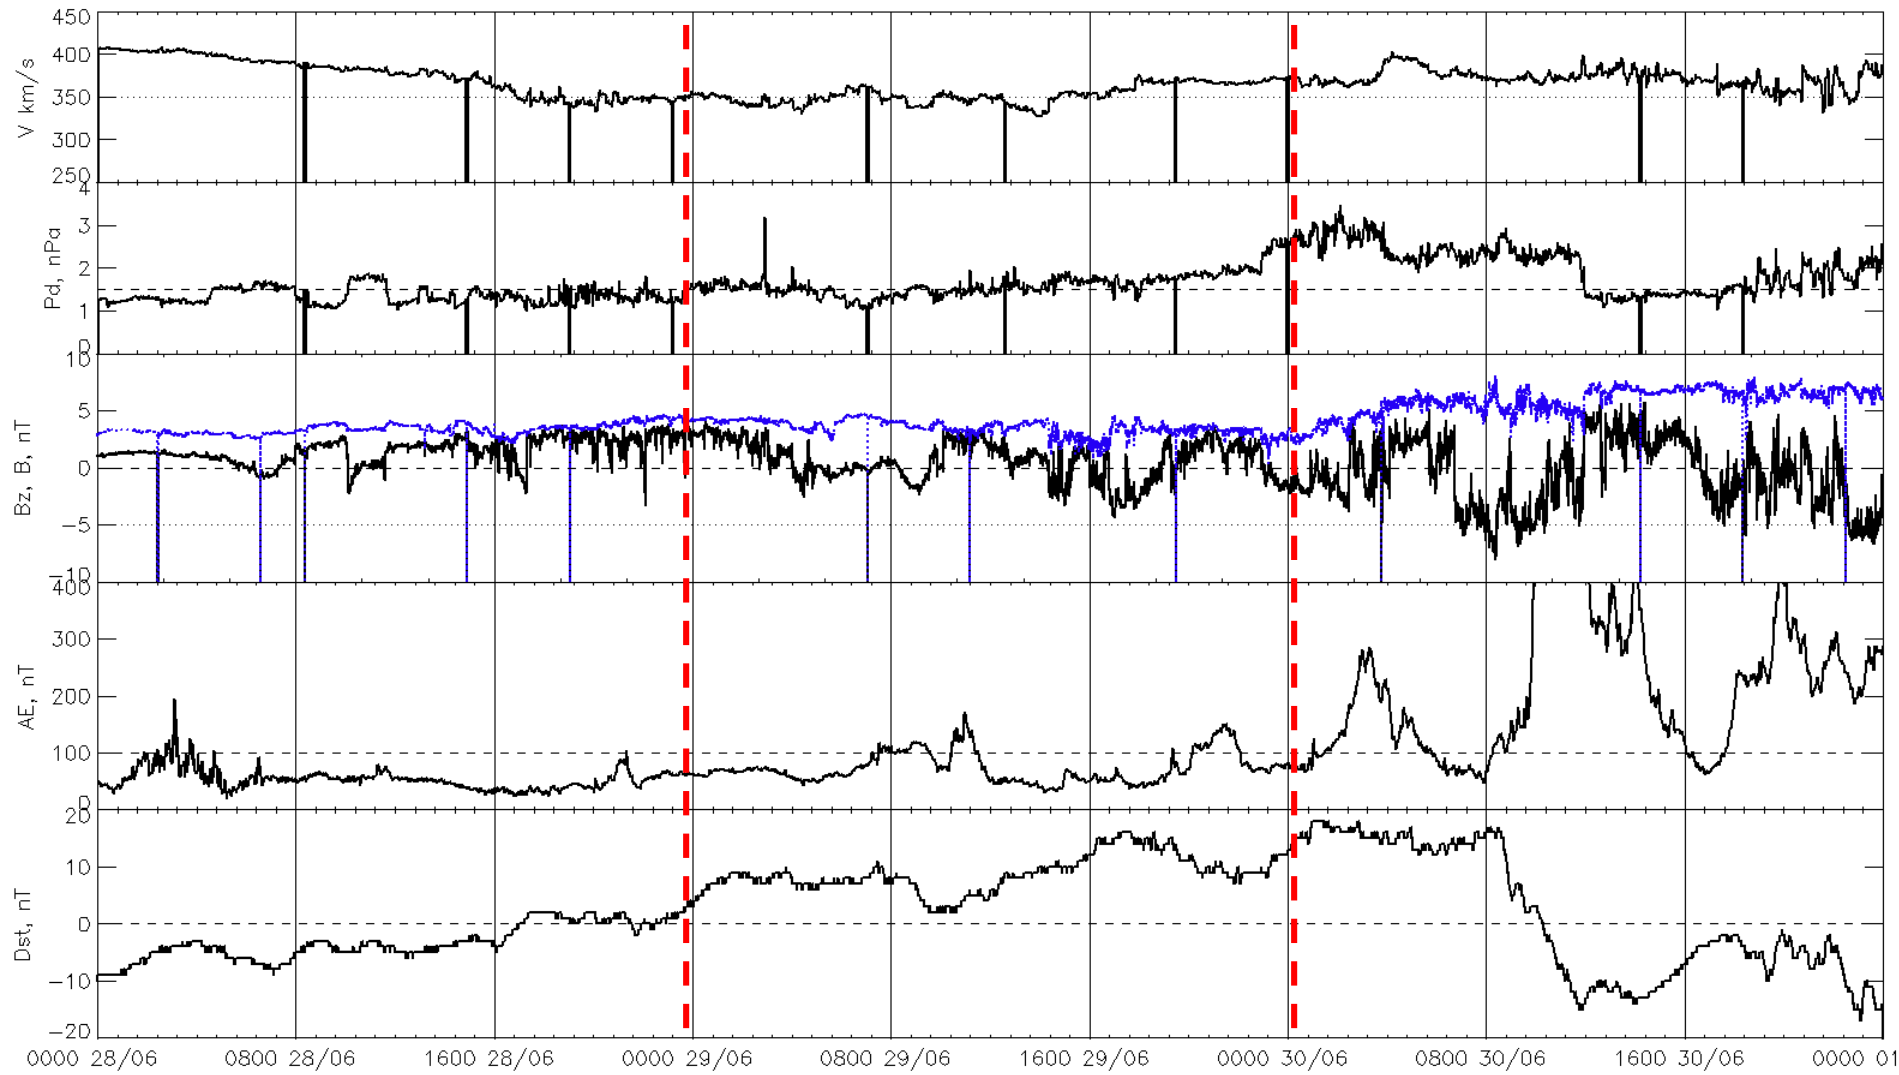

W1020627

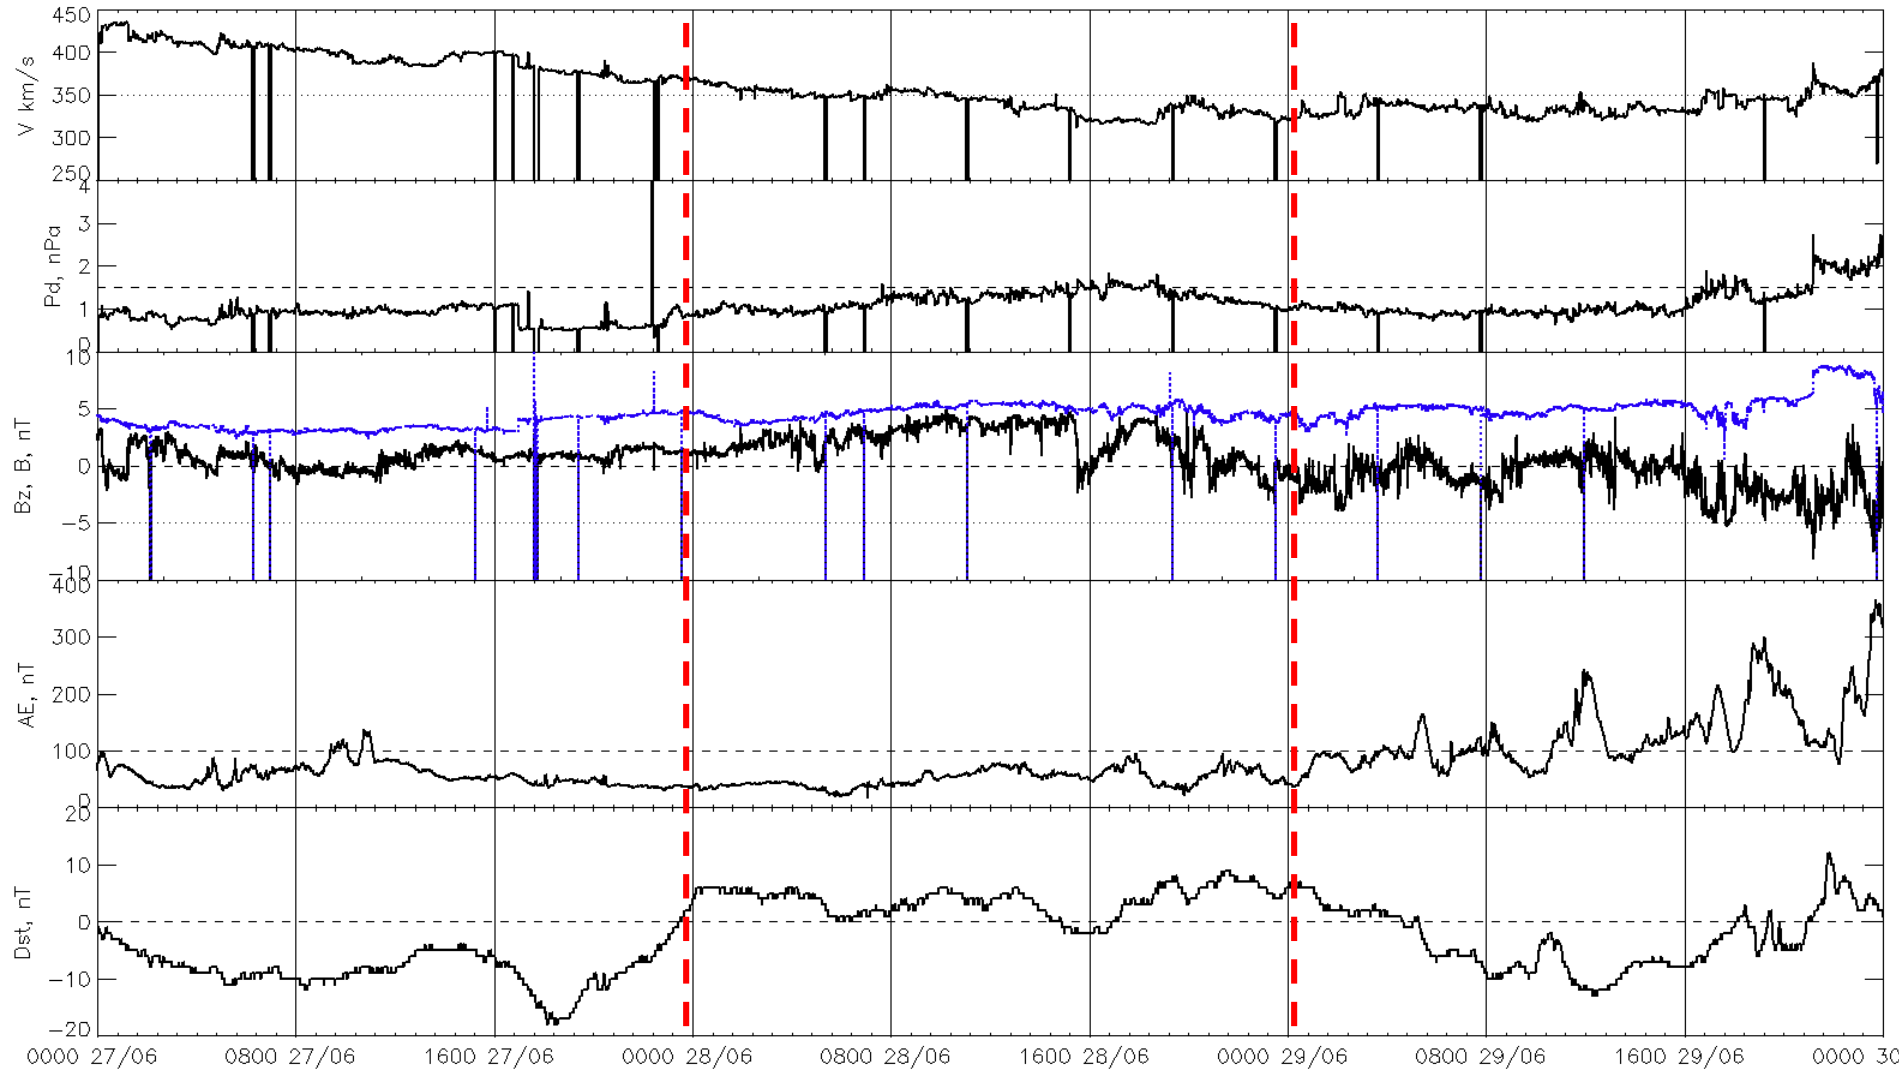

W1040623

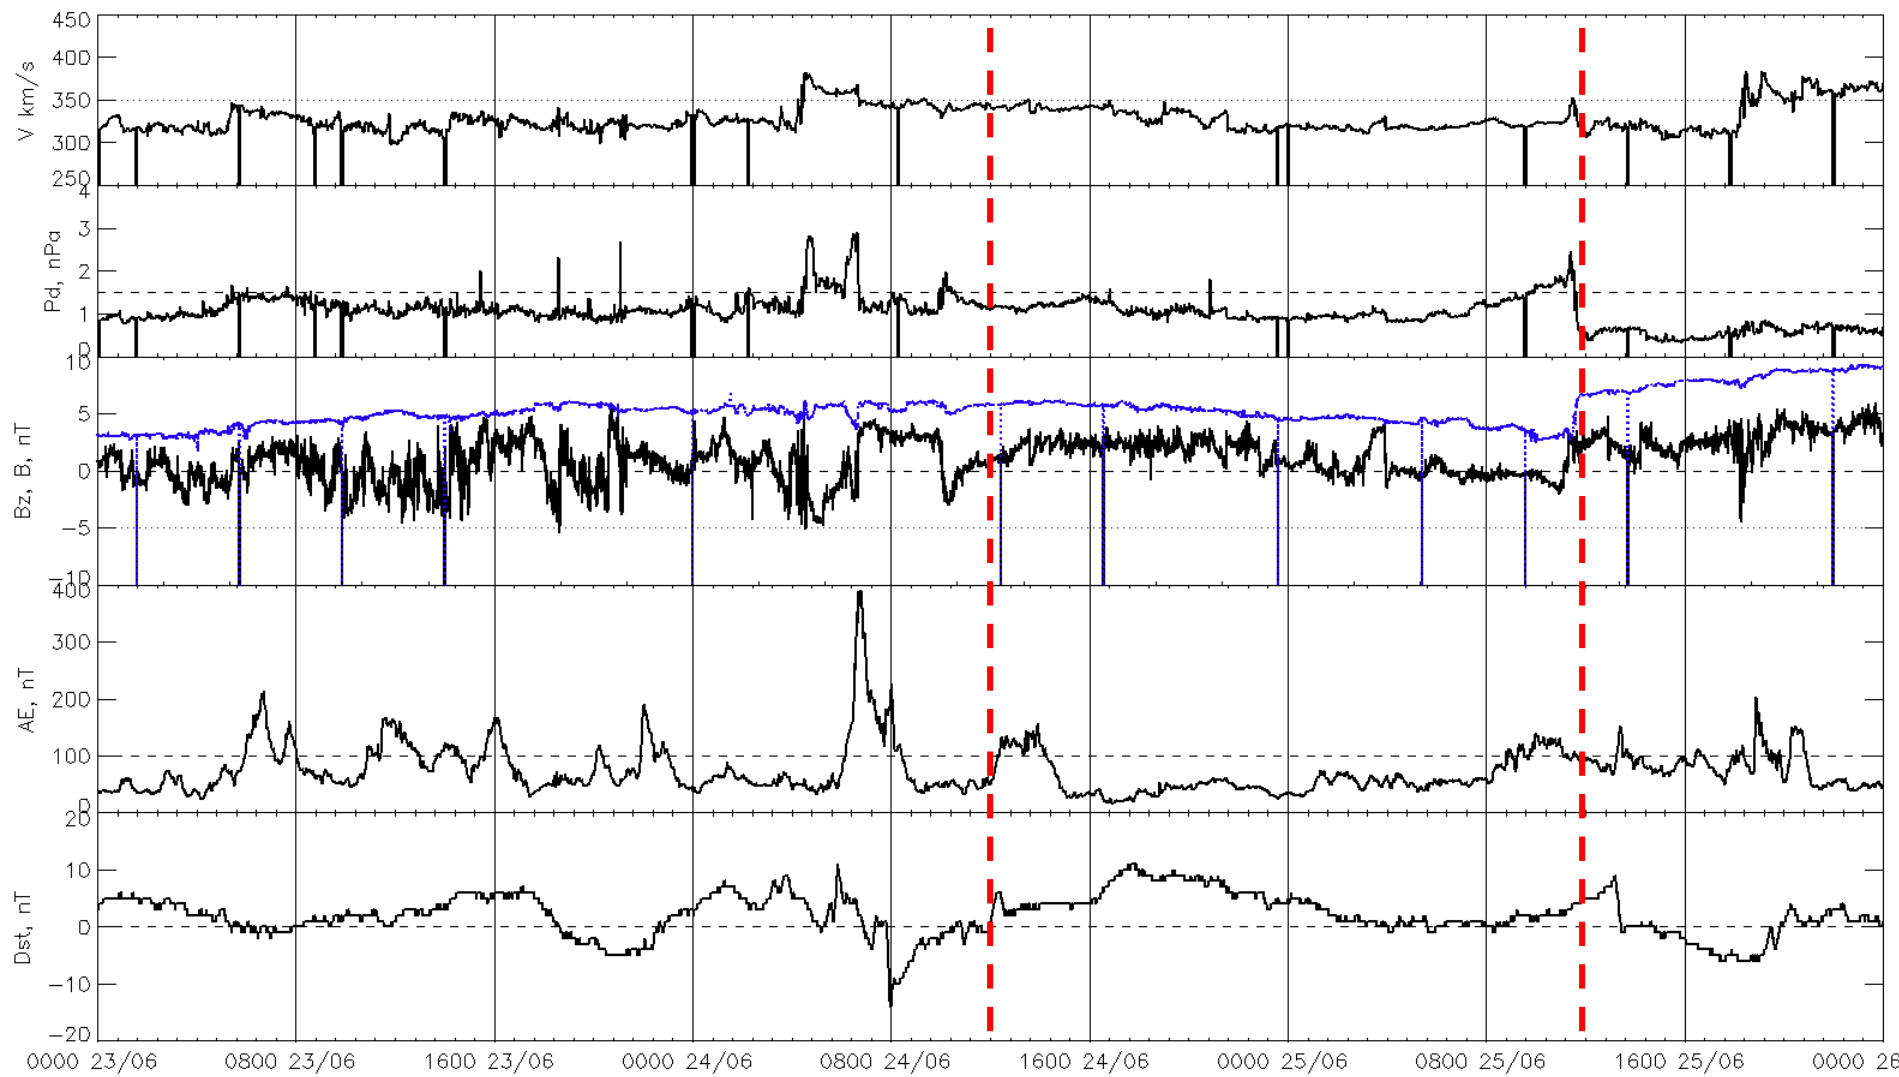

W1050620

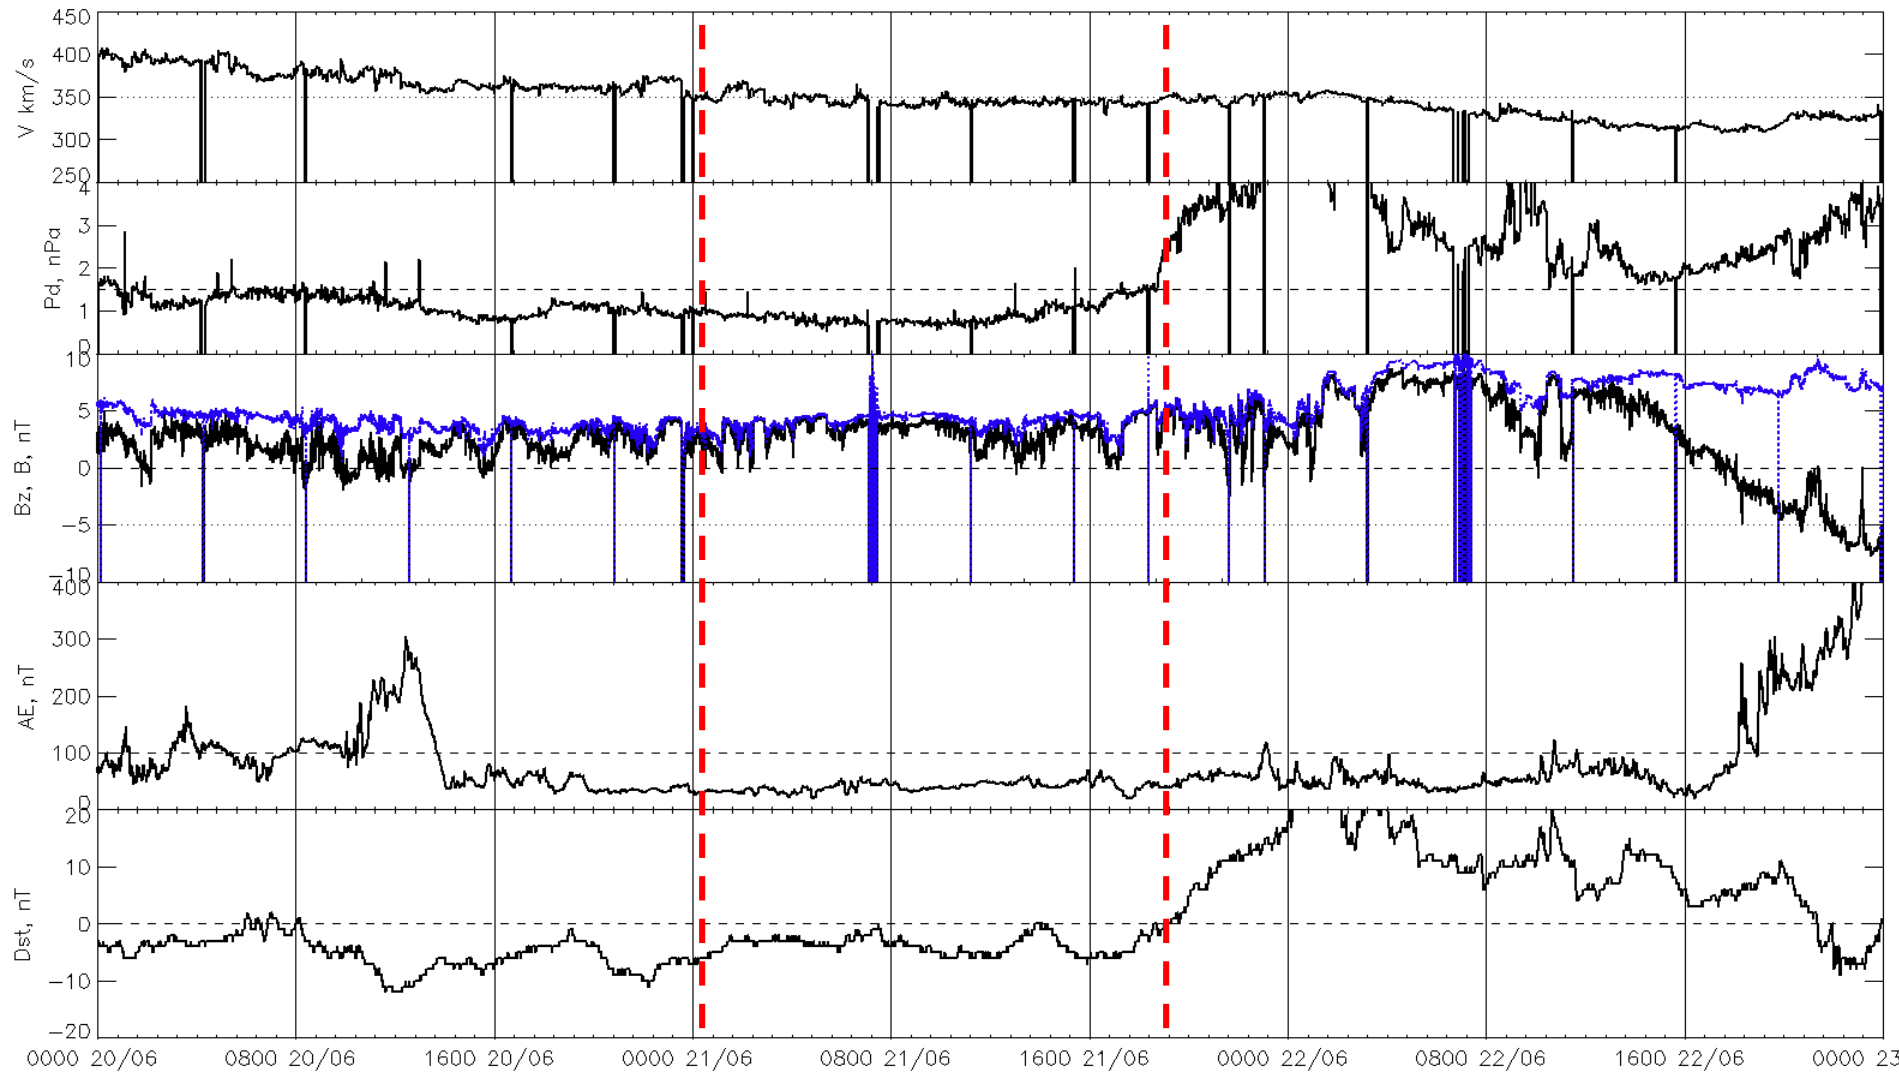

W1060622

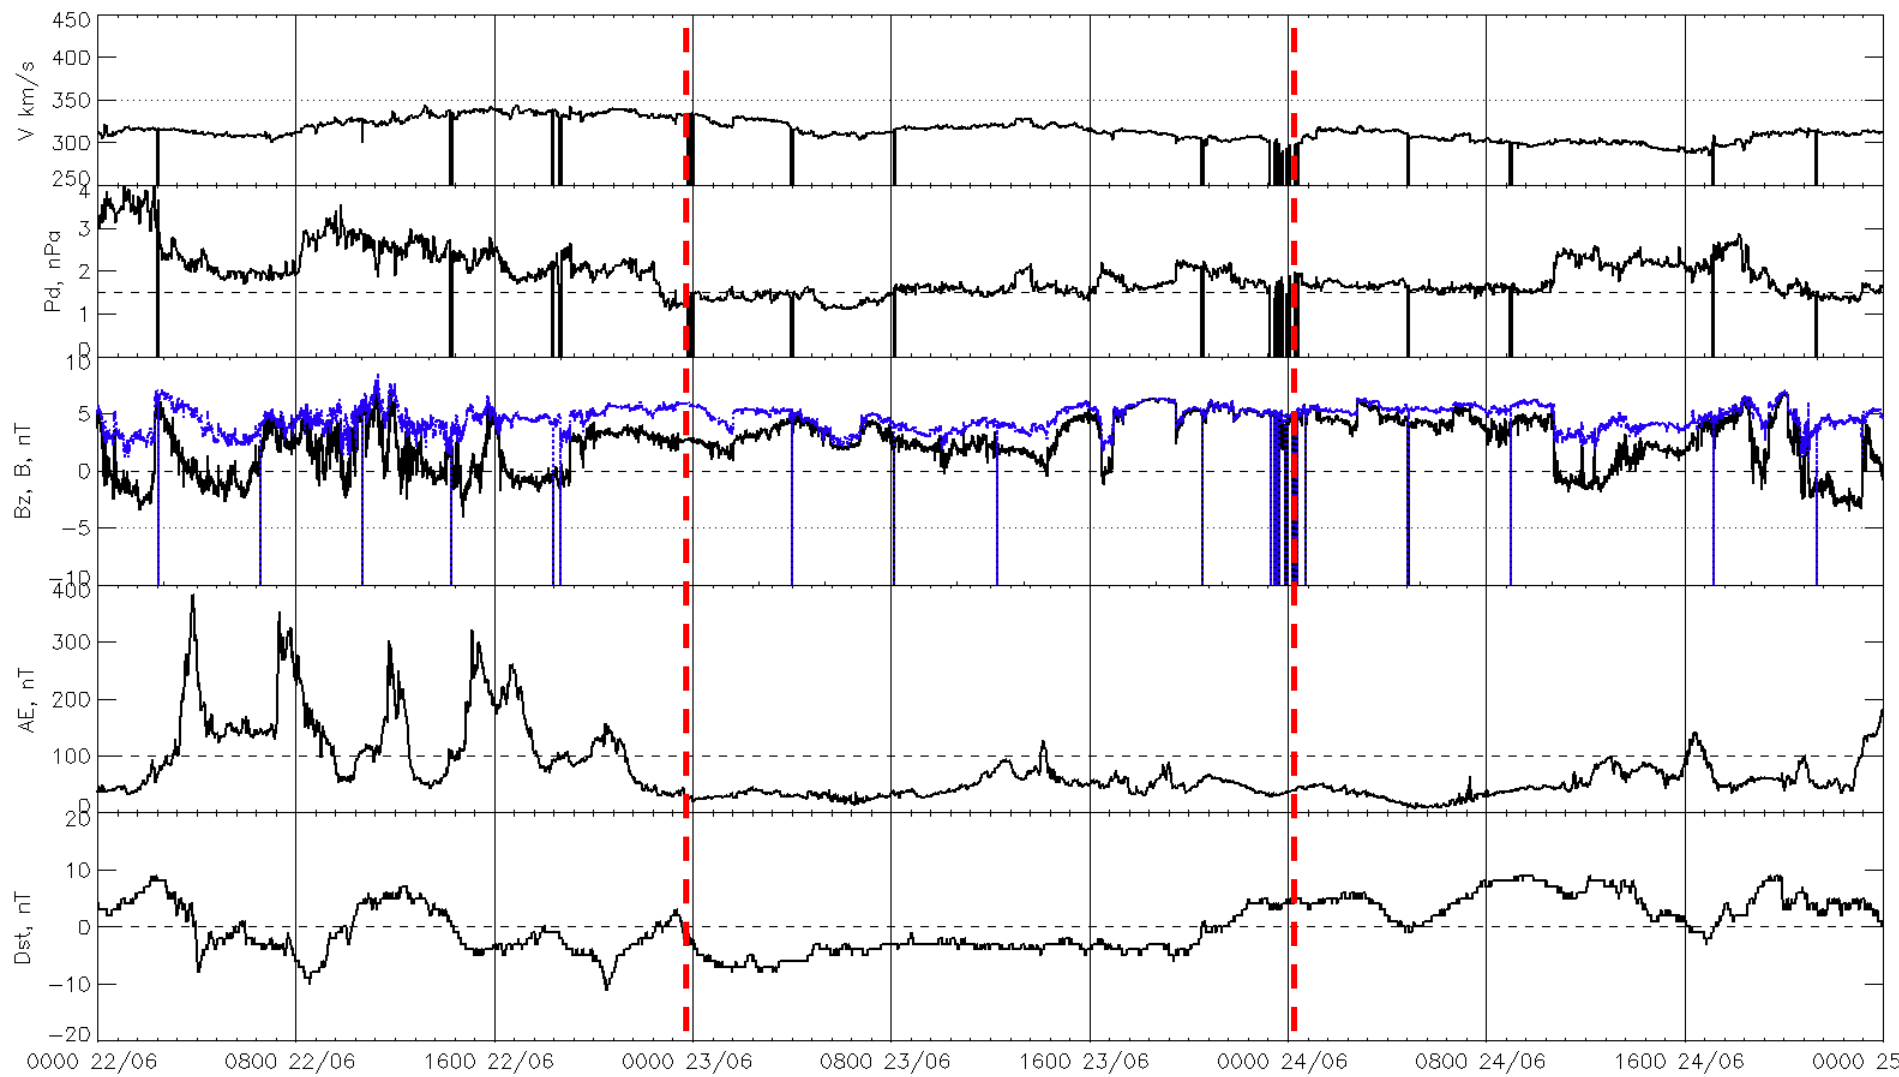

W1080612

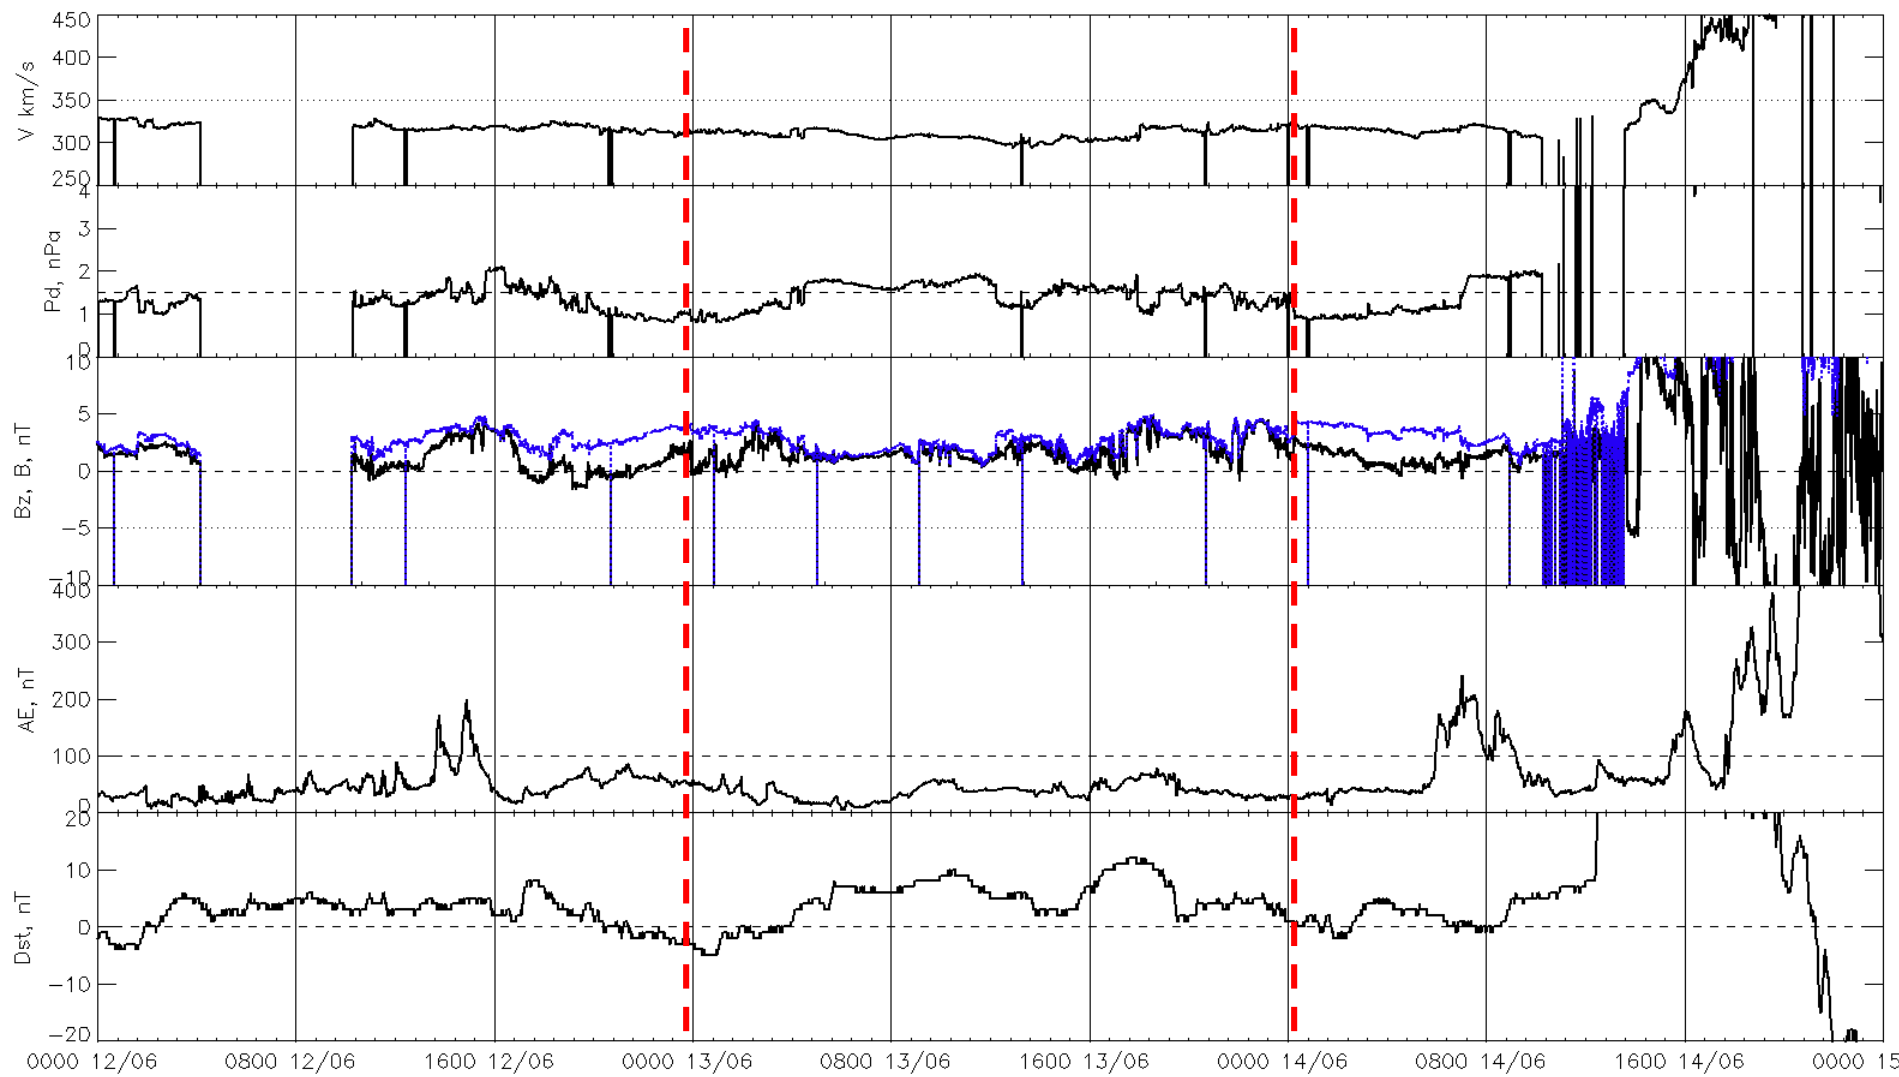



W1090616

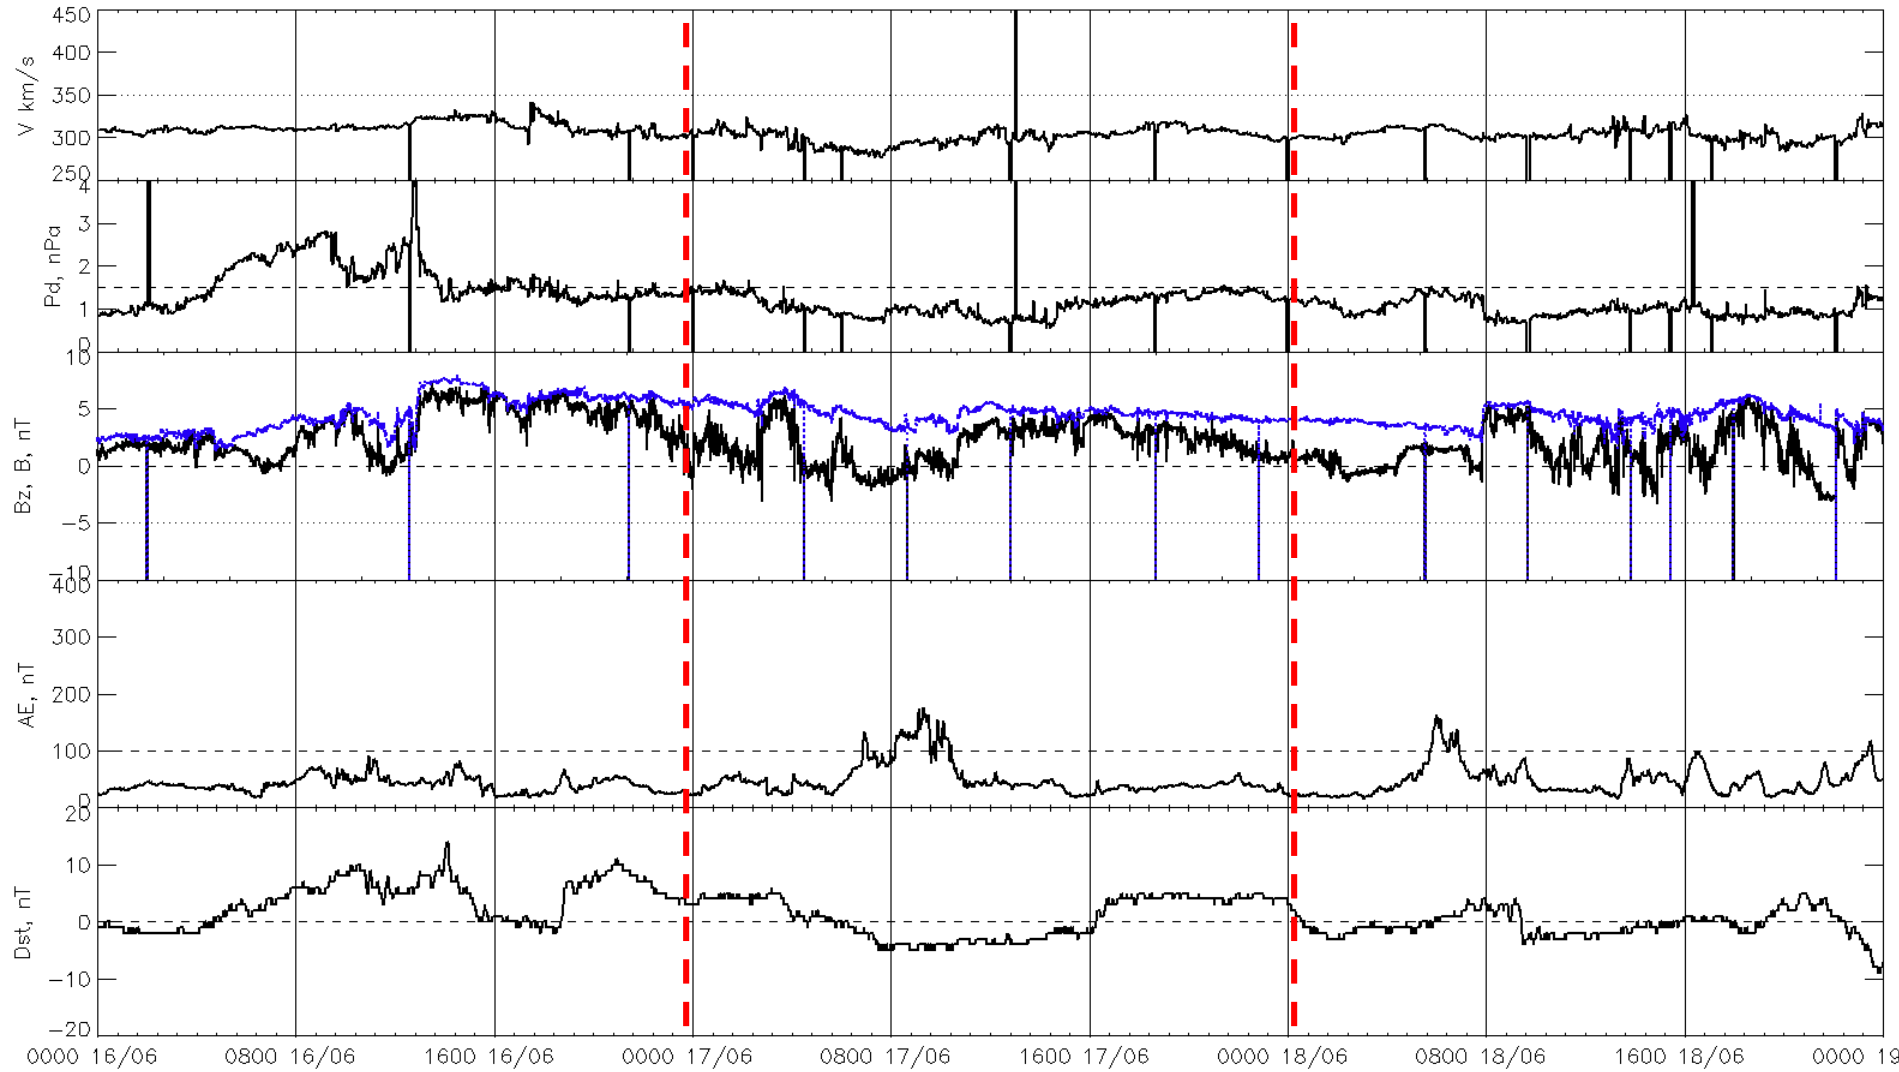

WI100611

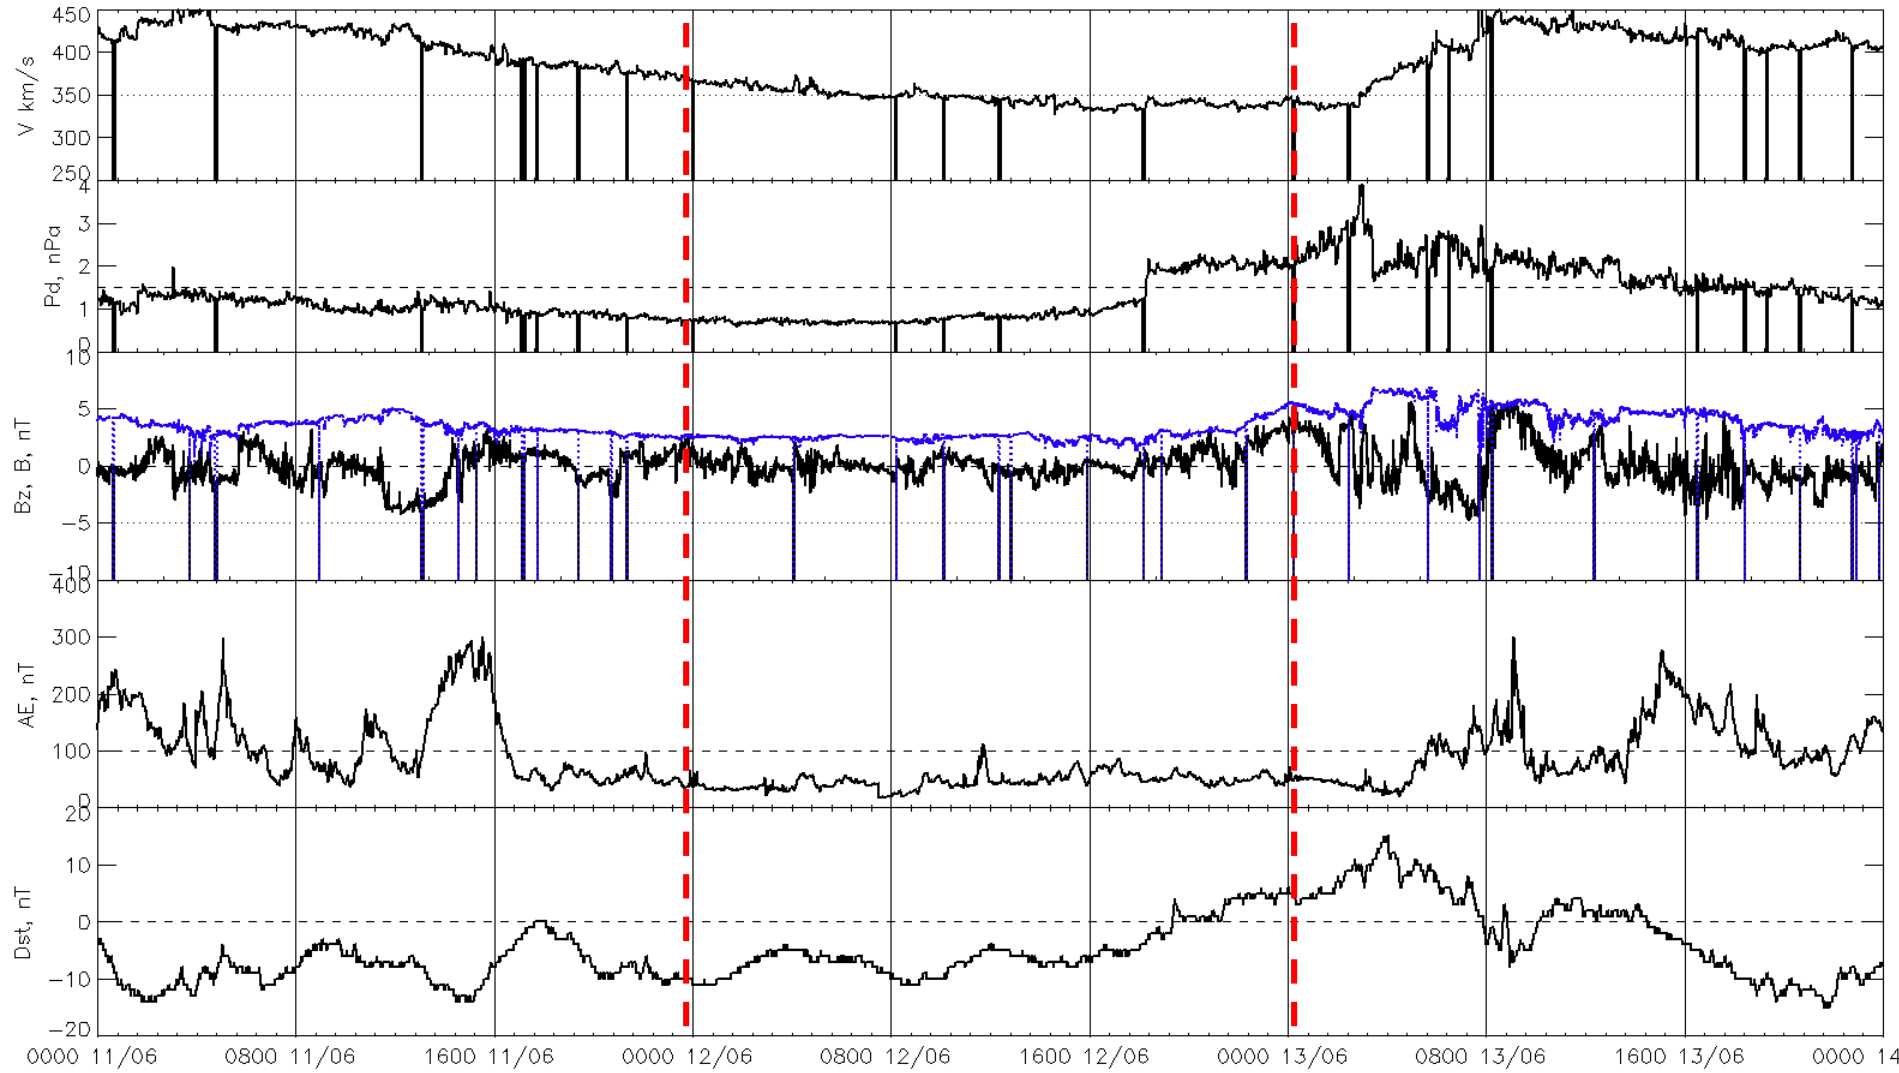

W110627

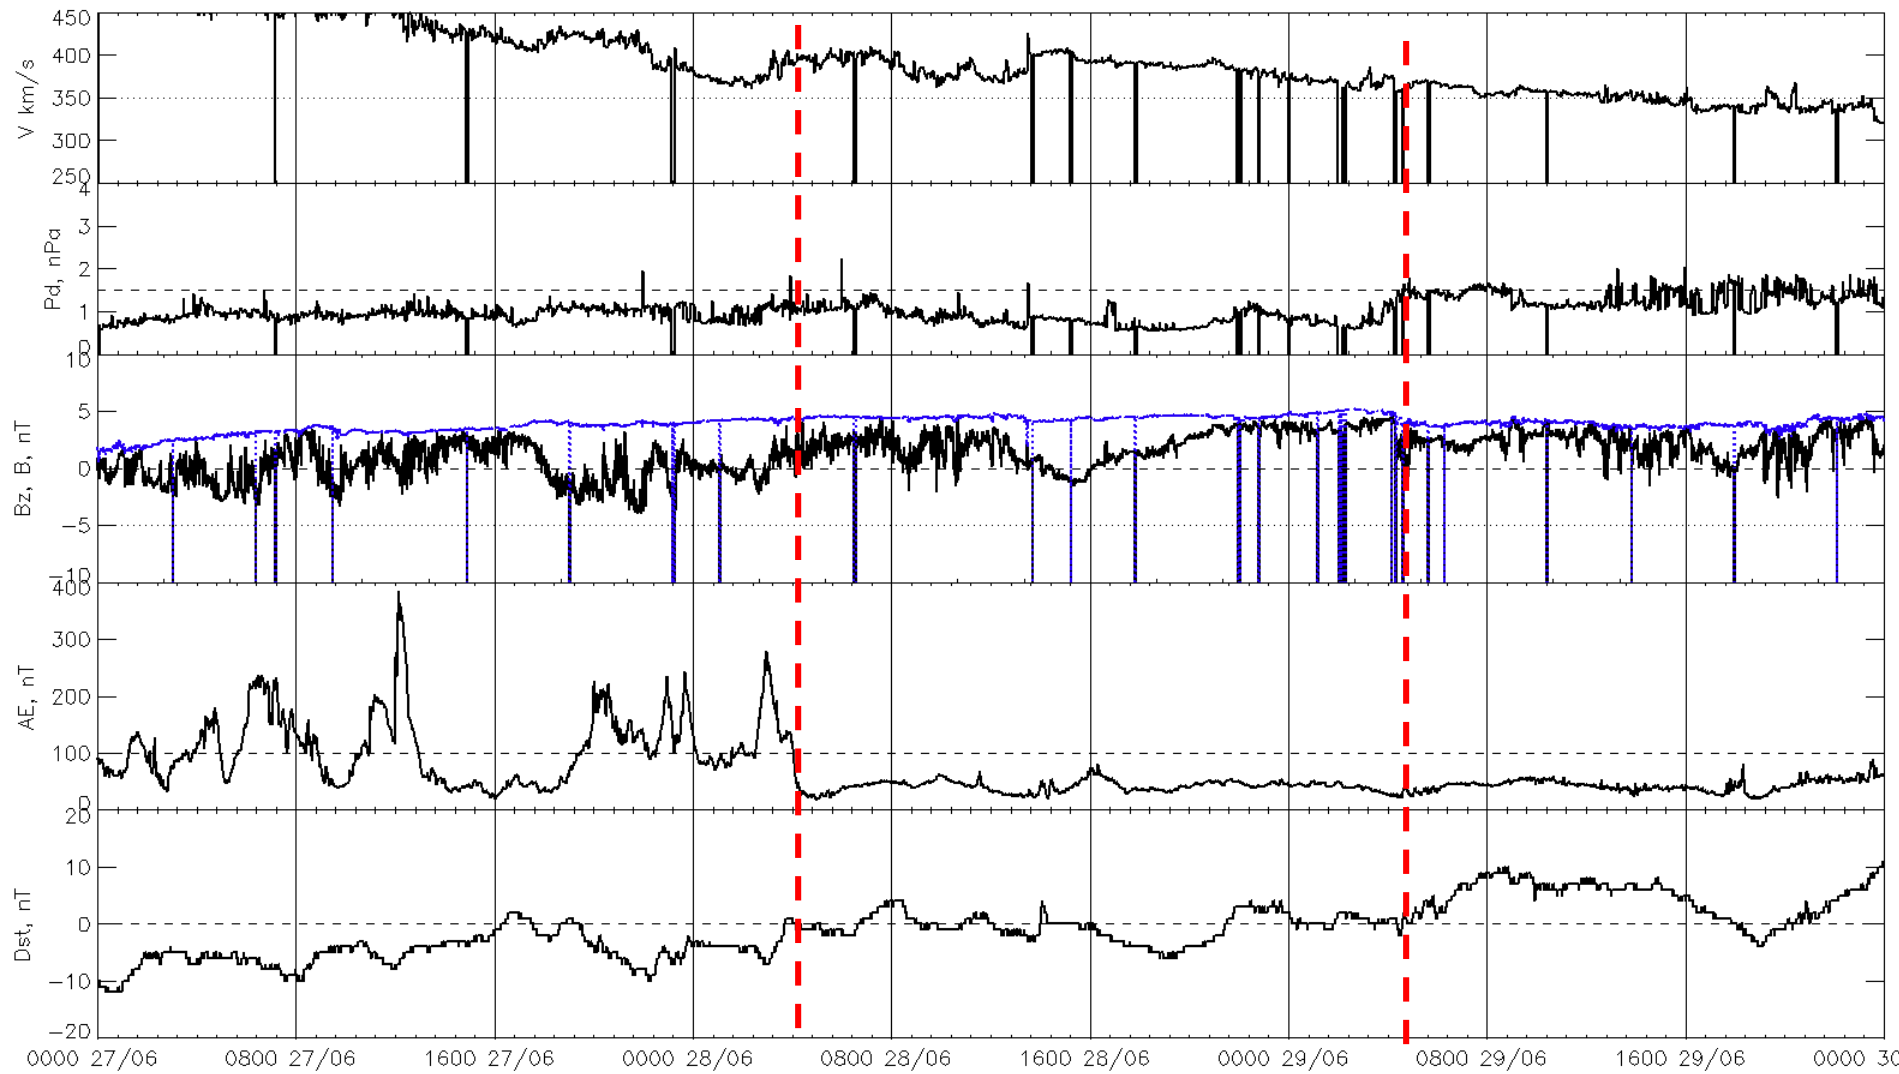

WI120614

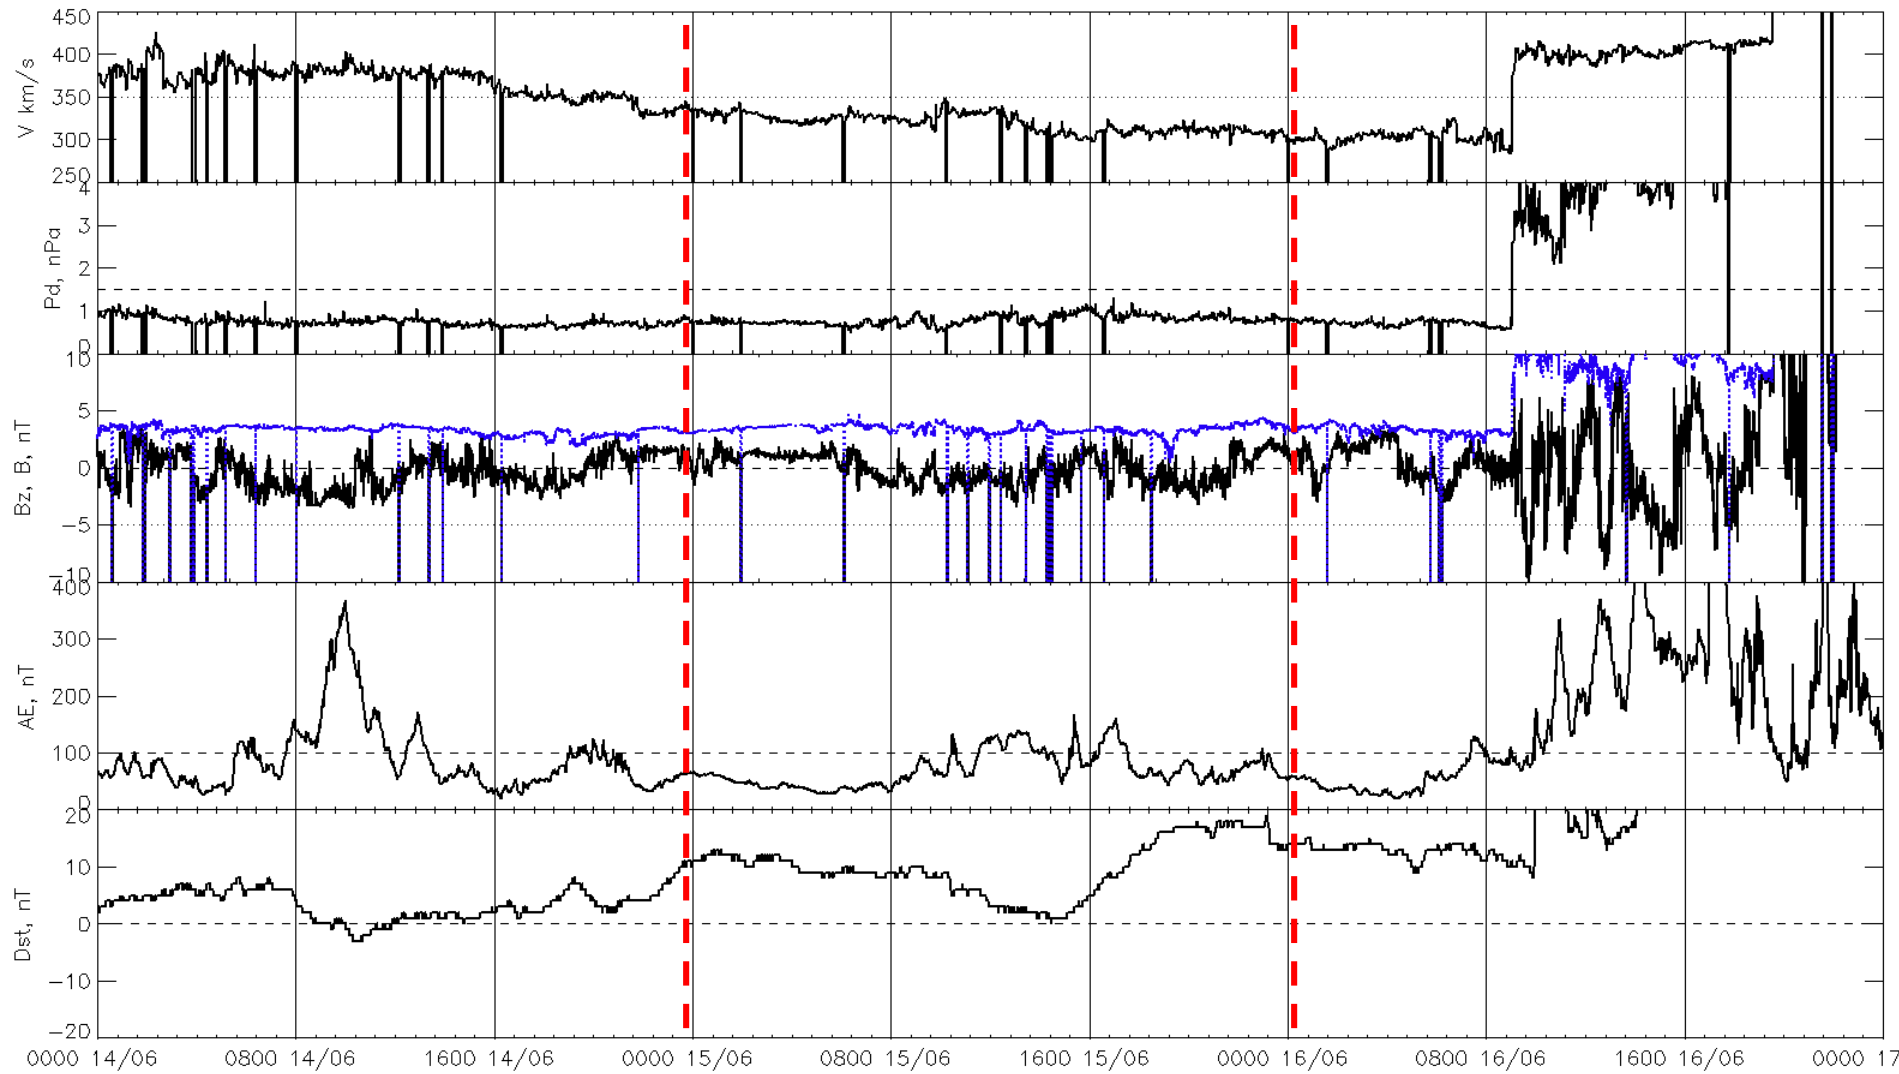

W1130615

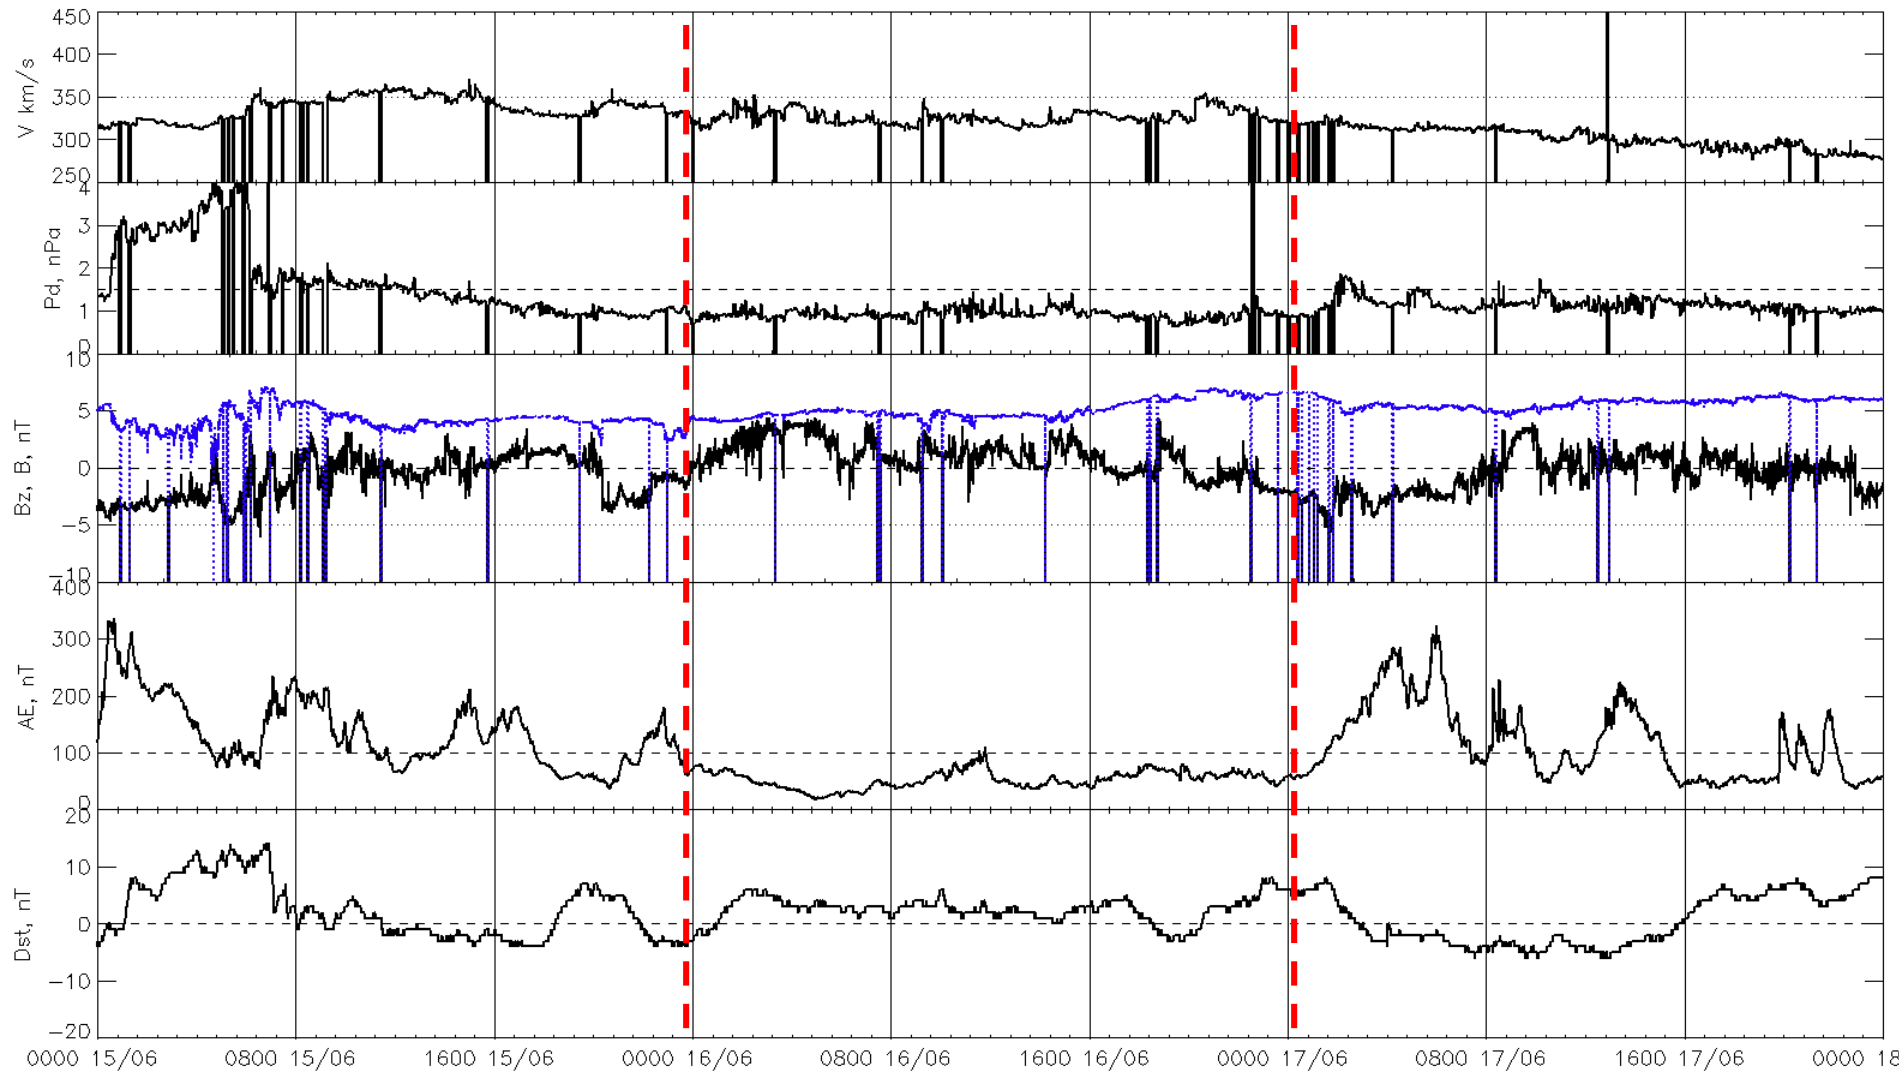

WI140531

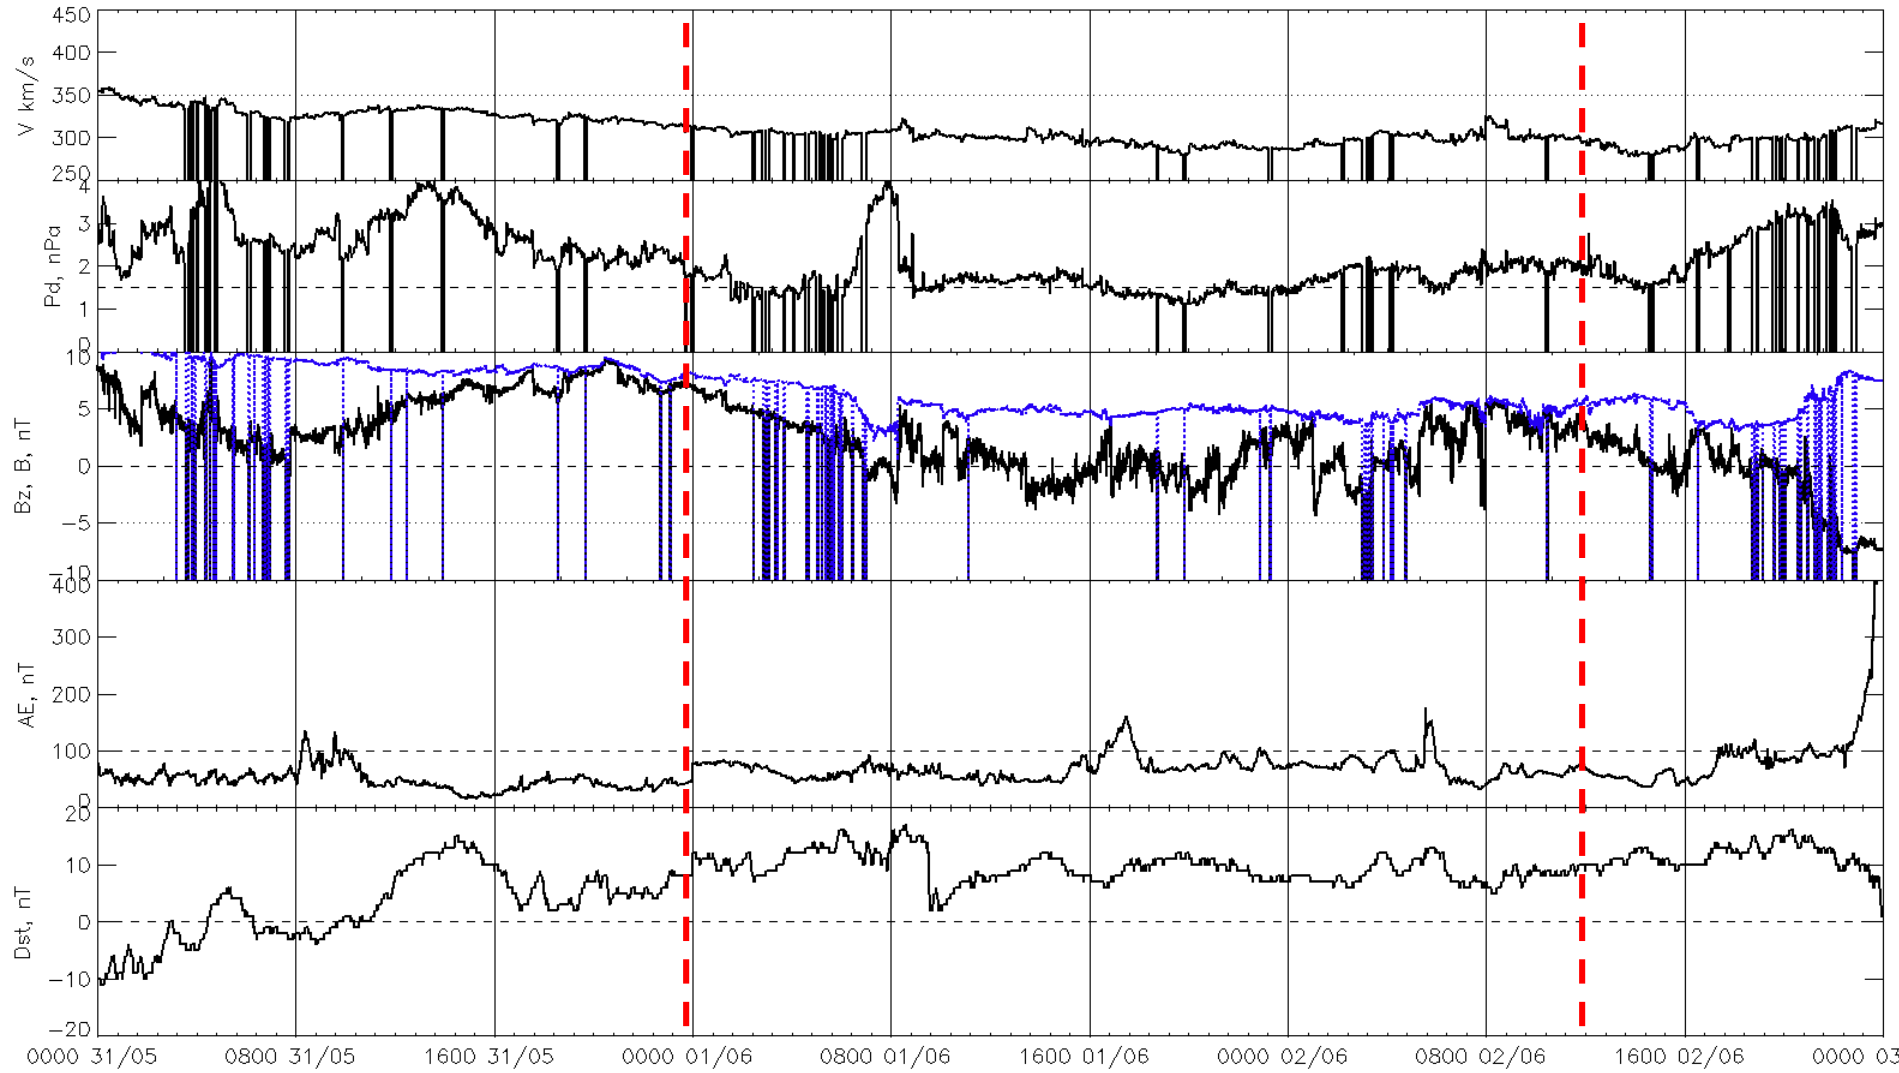

WI150603

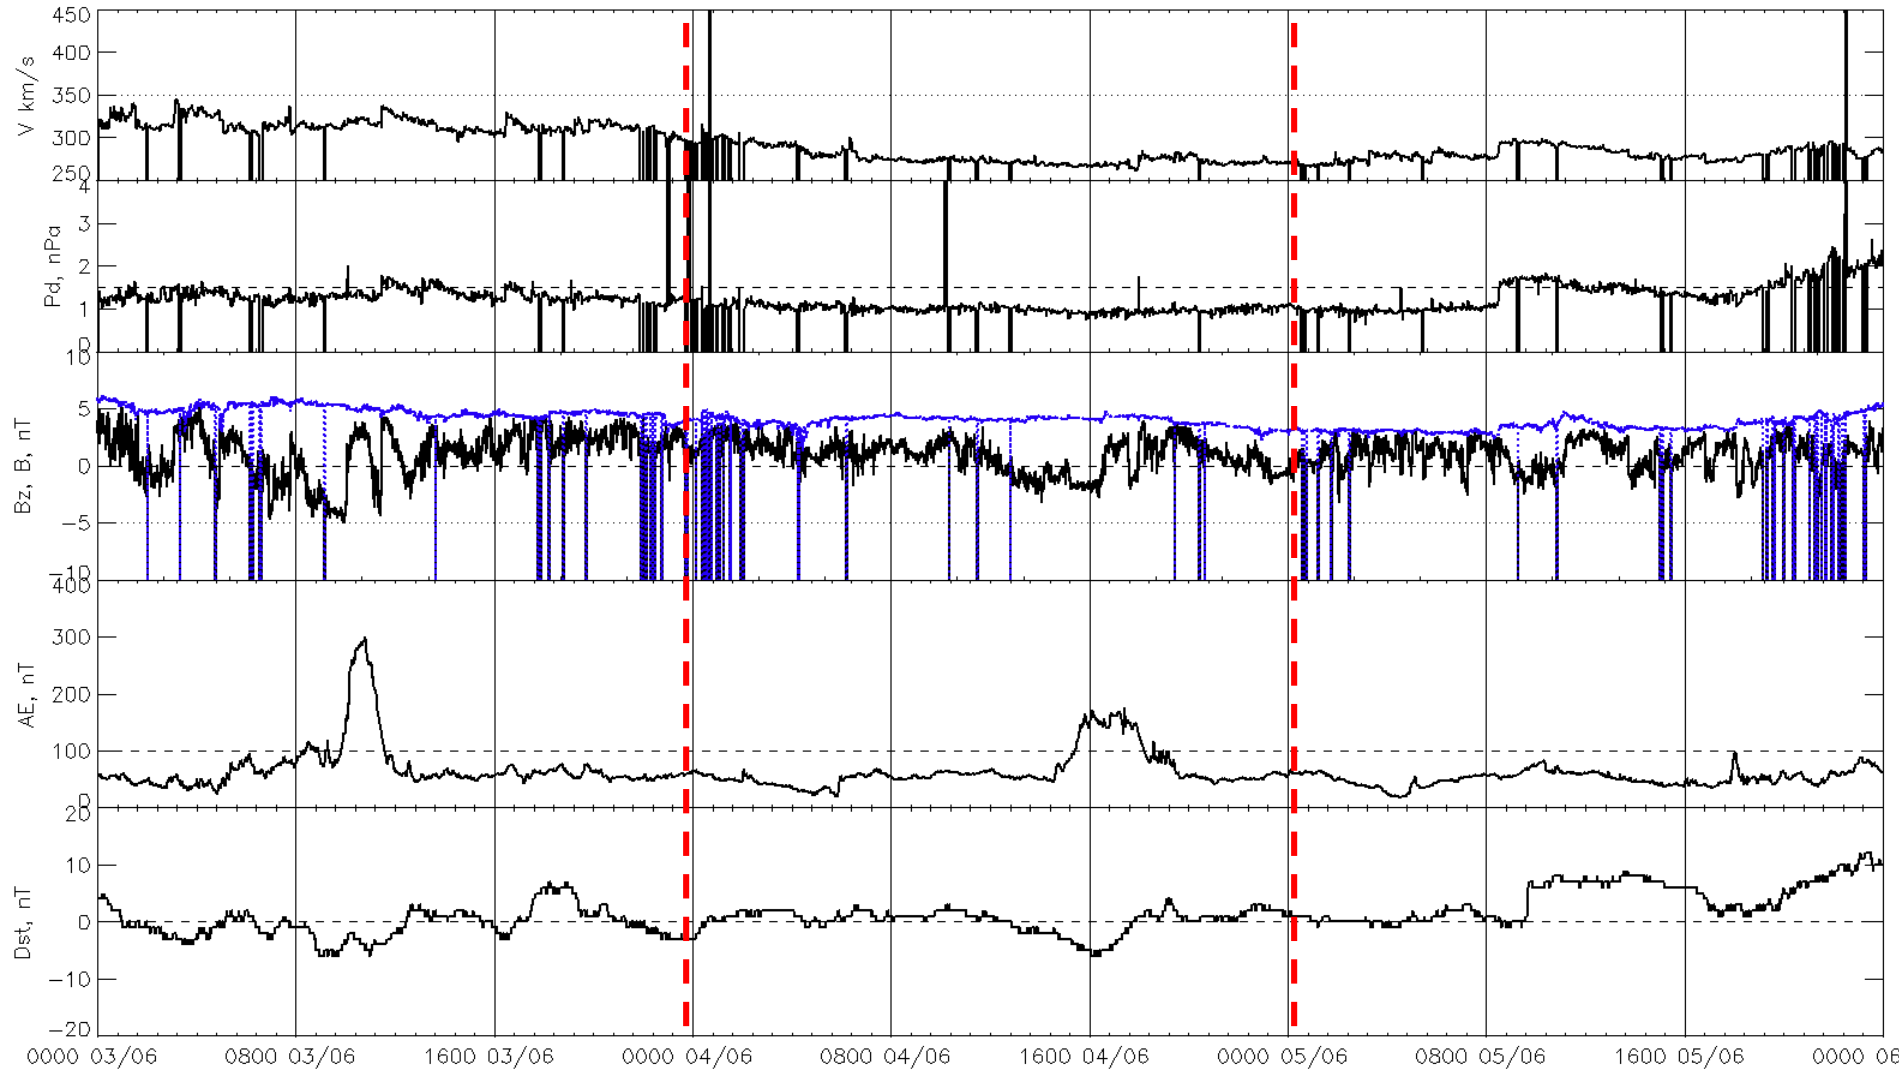

WI160602

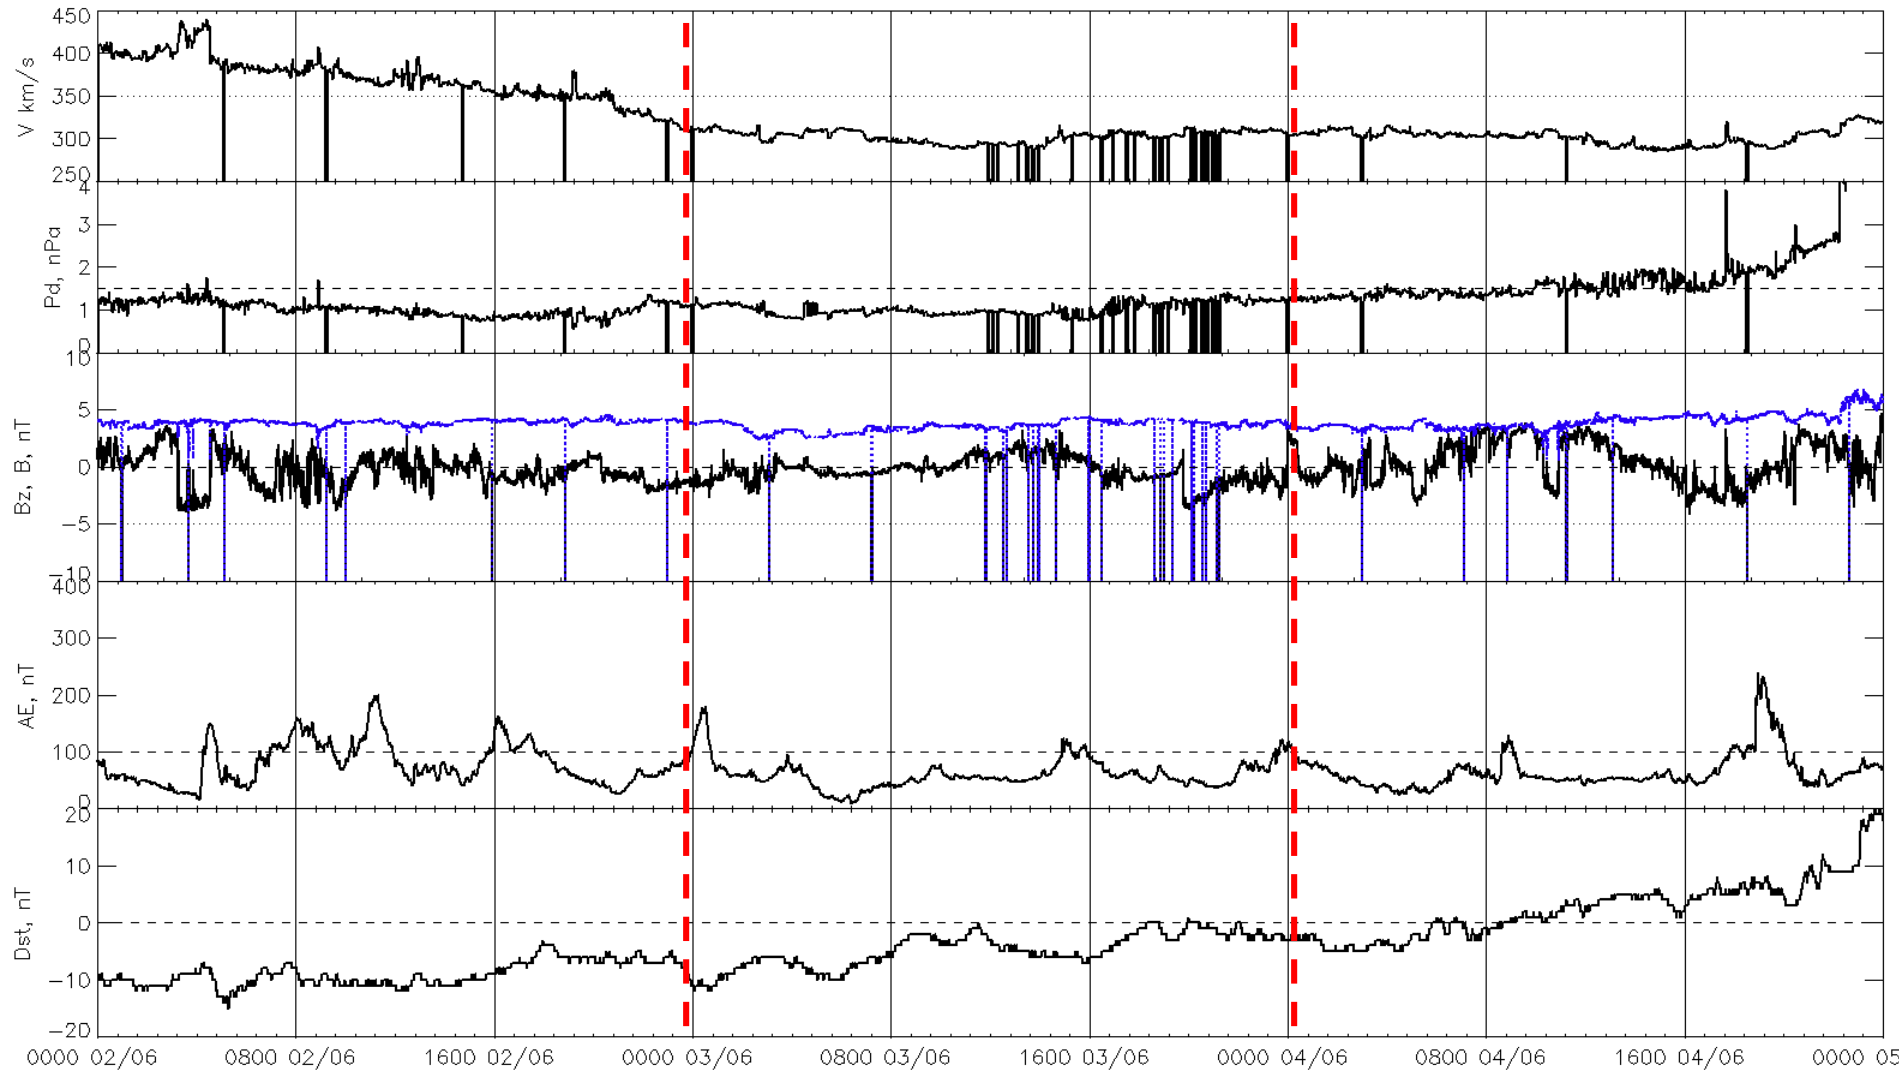



W1170608

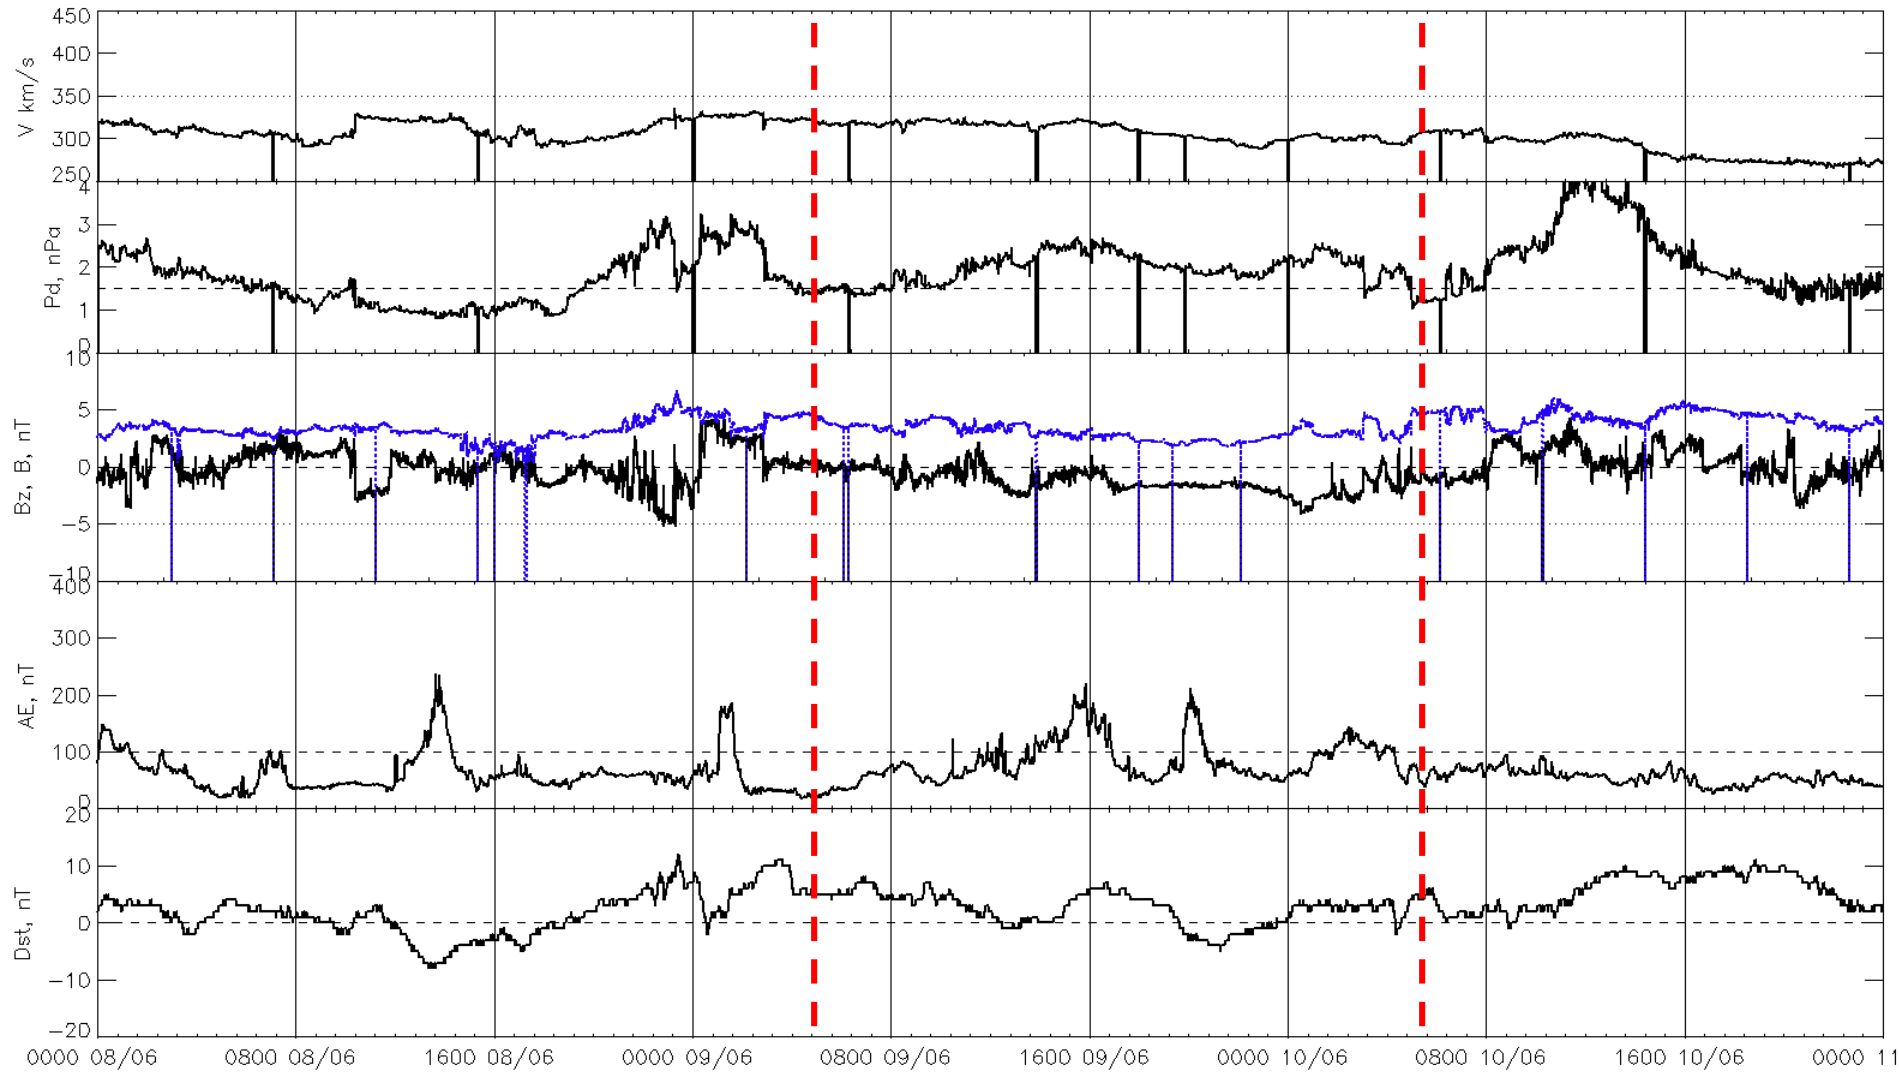

W180611

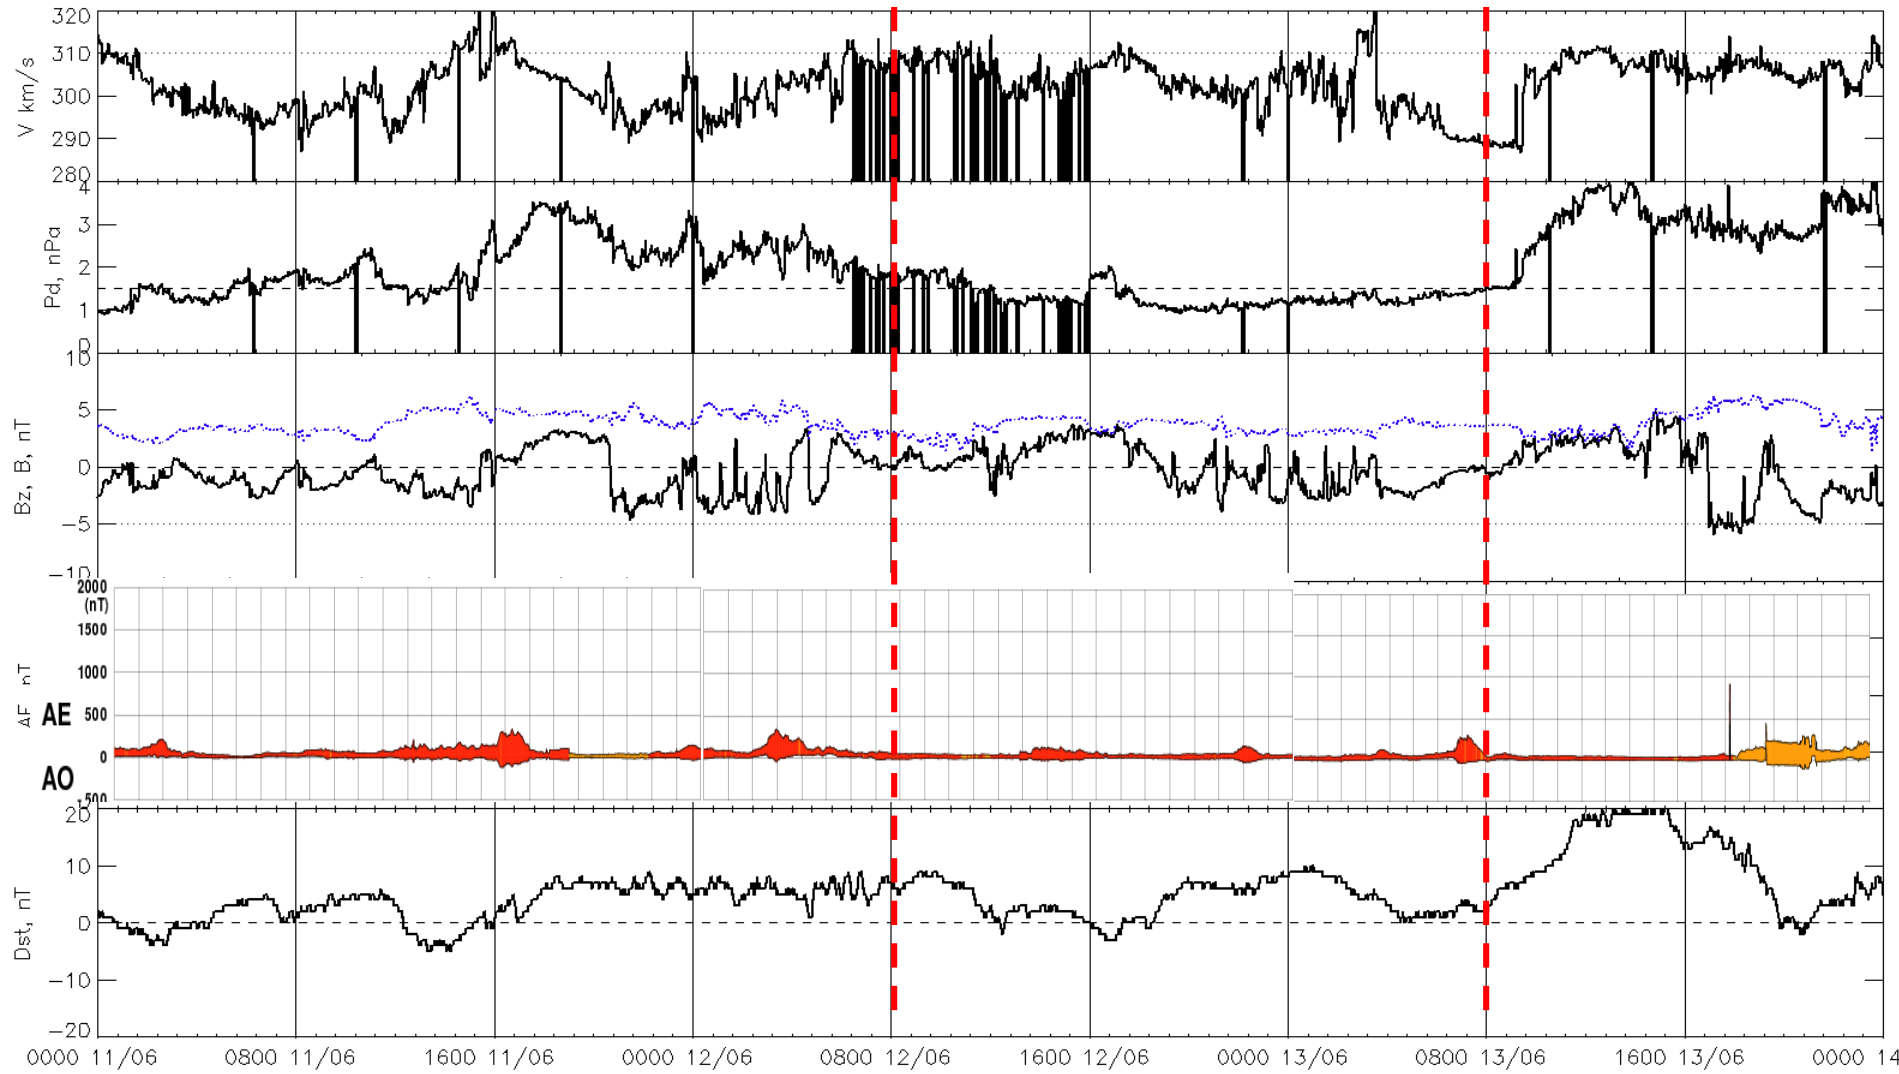

POES  $e > 30$  keV PA=90 avr 2001/08/29 0h - dt=24h

min/max: 1.0E+000/1.0E+005

POES\_mapGsum\_05

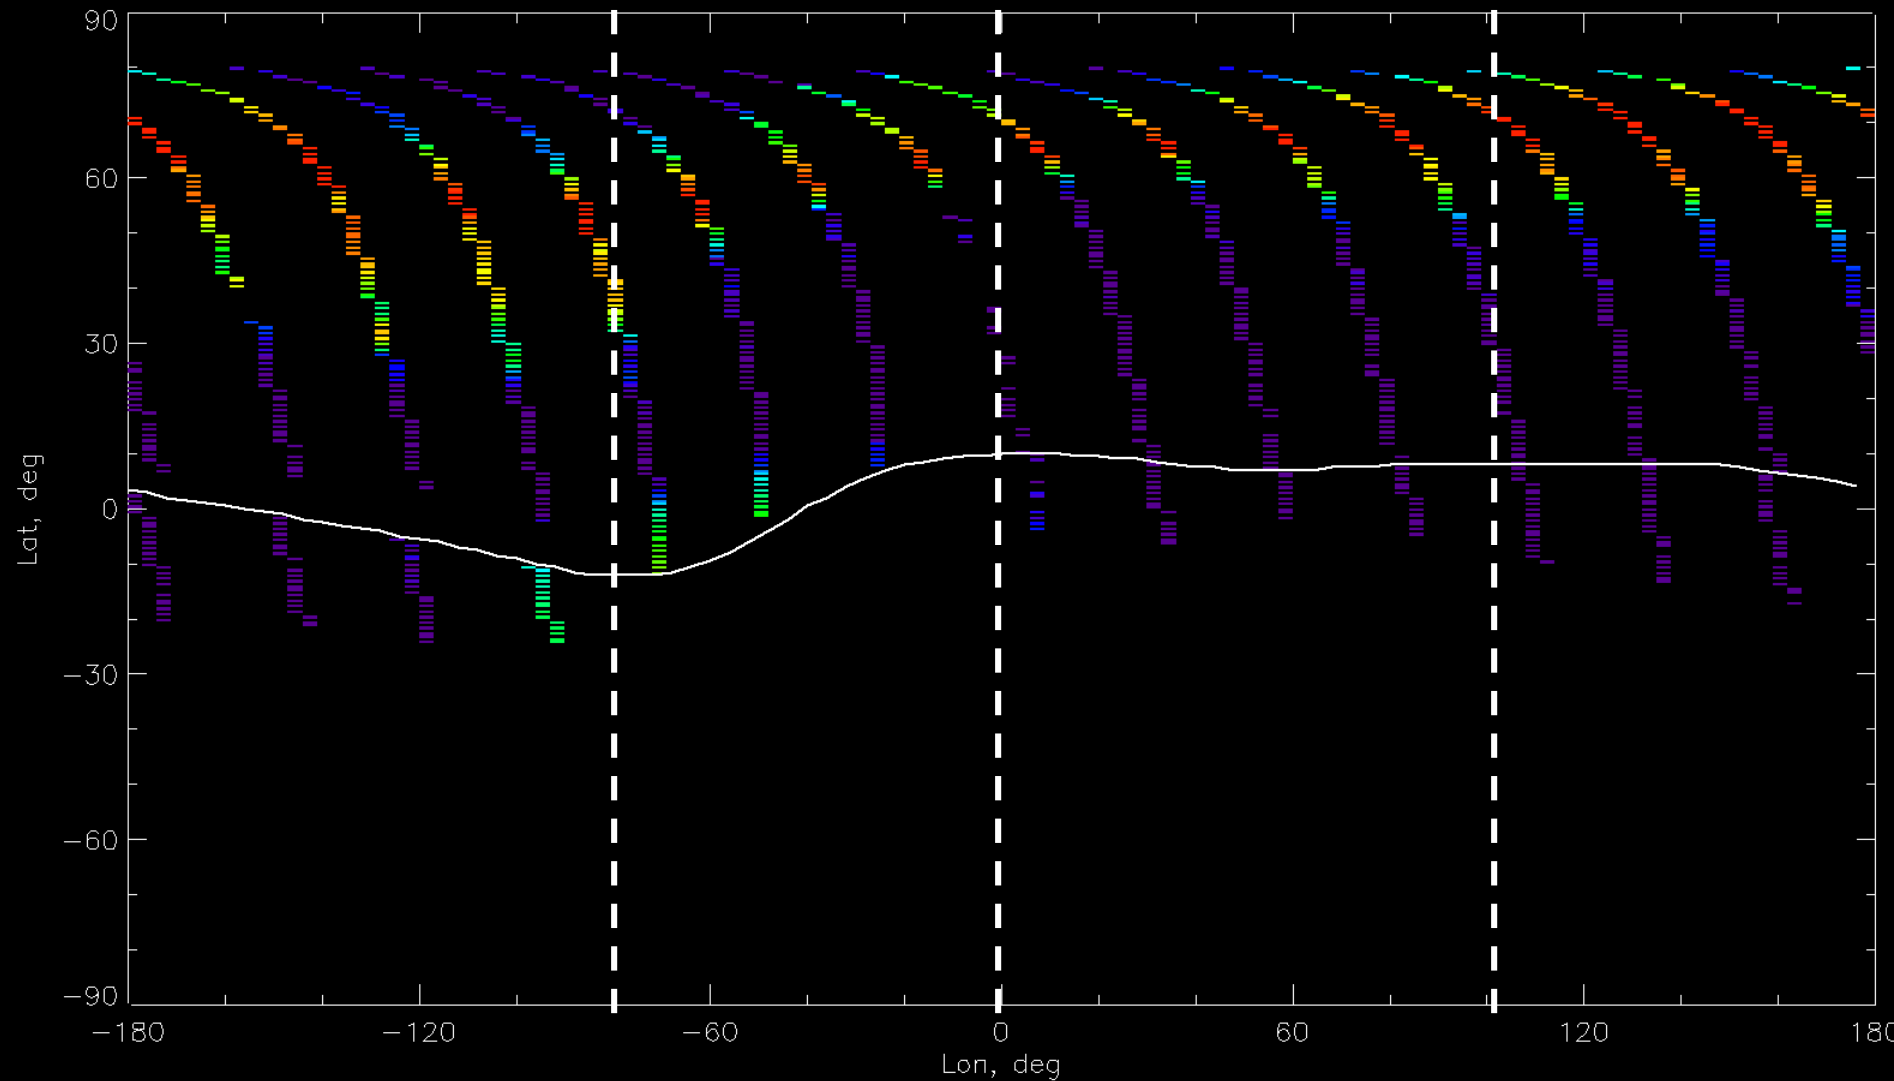

POES  $e > 30$  keV PA=90 avr 2002/08/28 0h - dt=24h

min/max: 1.0E+000/1.0E+005

POES\_mapGsum\_05

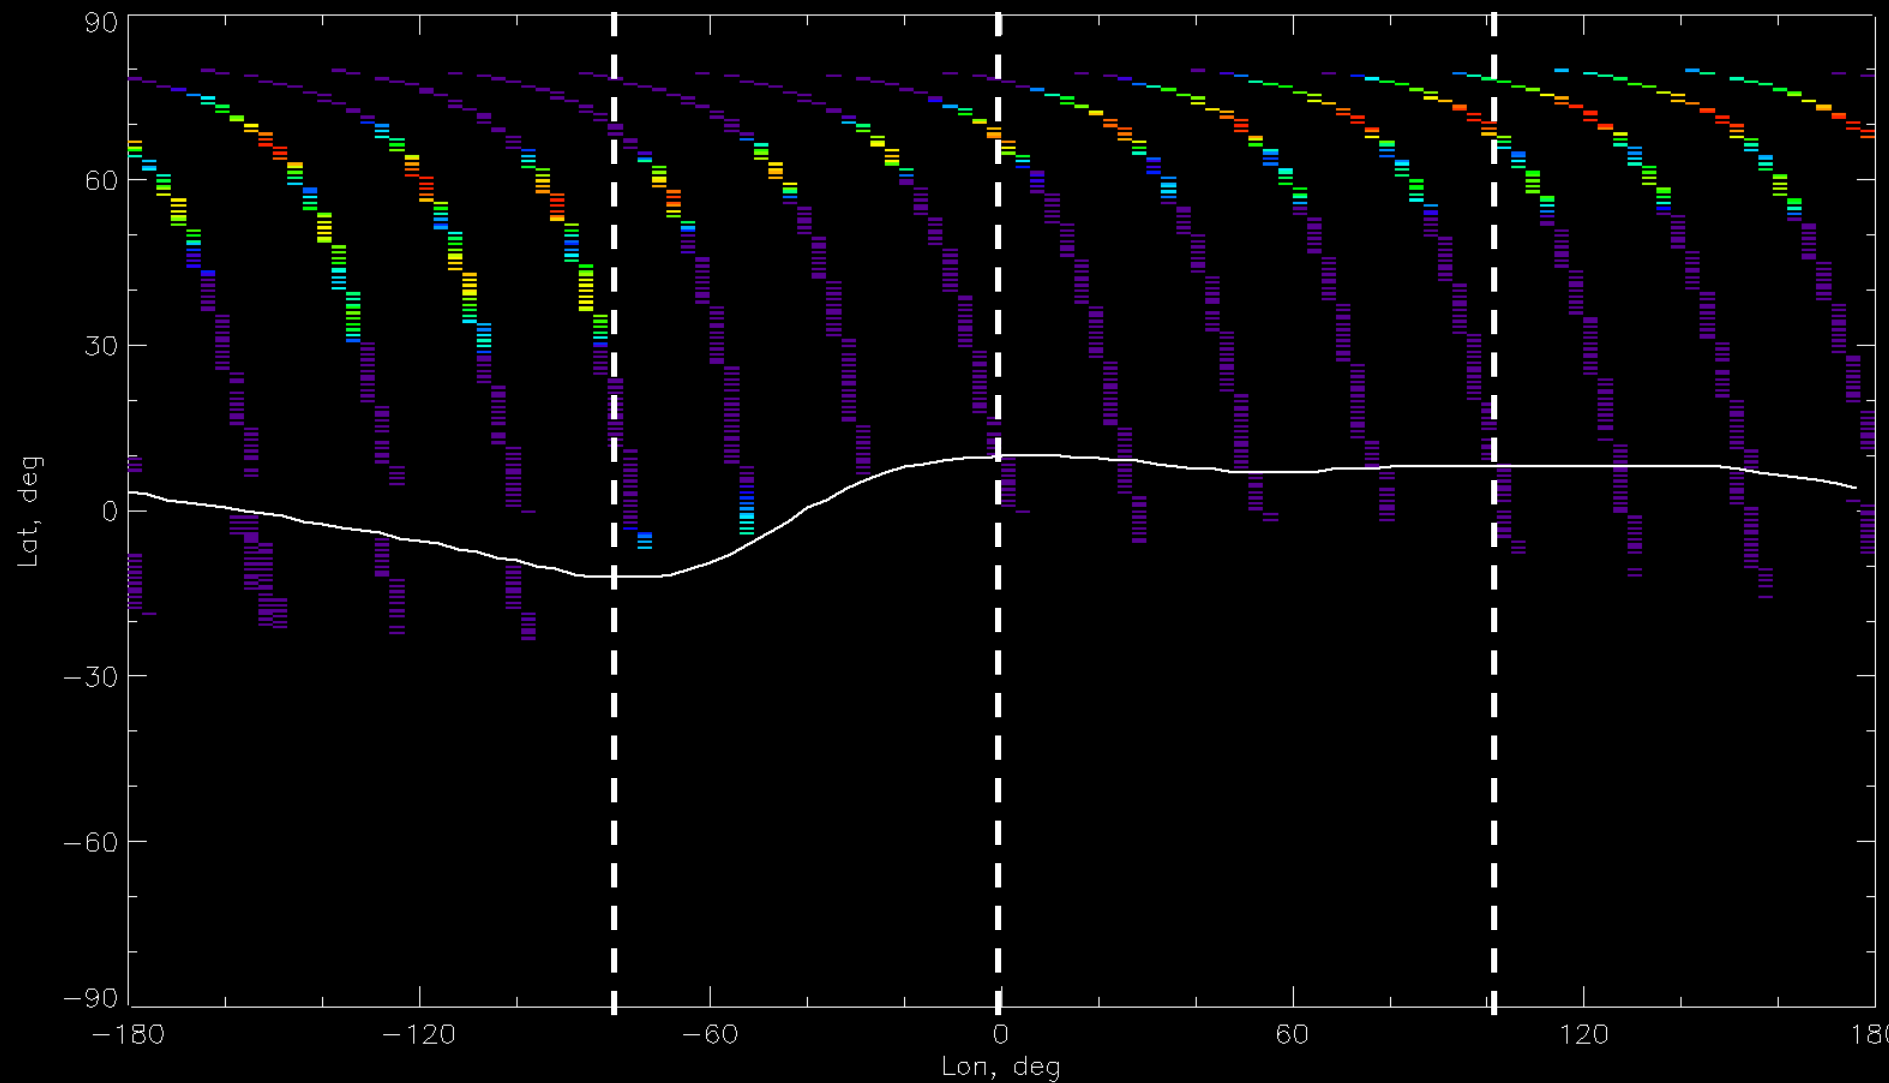

POES  $e > 30$  keV PA=90 avr 2004/08/24 12h - dt=24h

min/max: 1.0E+000/1.0E+005

POES\_mapGsum\_05

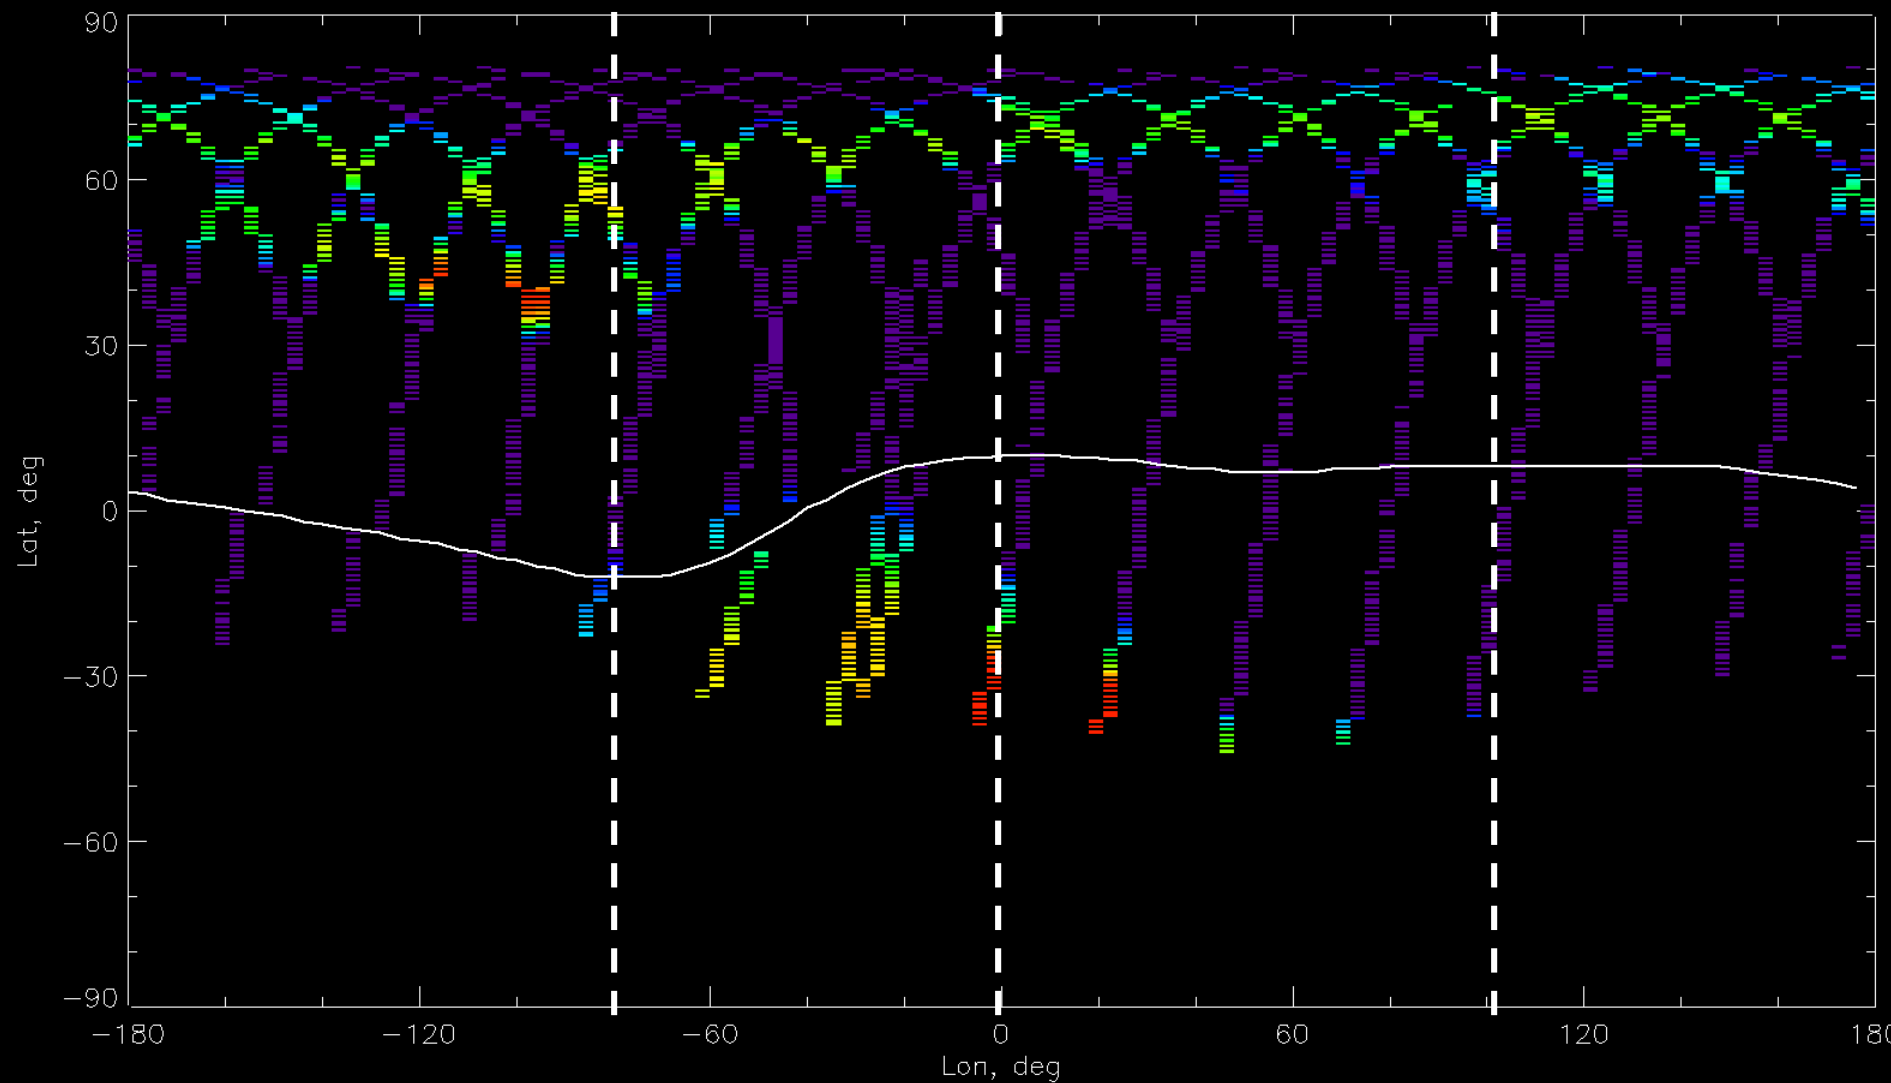

POES  $e > 30$  keV PA=90 avr 2005/08/21 0h - dt=18h

min/max: 1.0E+000/1.0E+005

POES\_mapGsum\_05

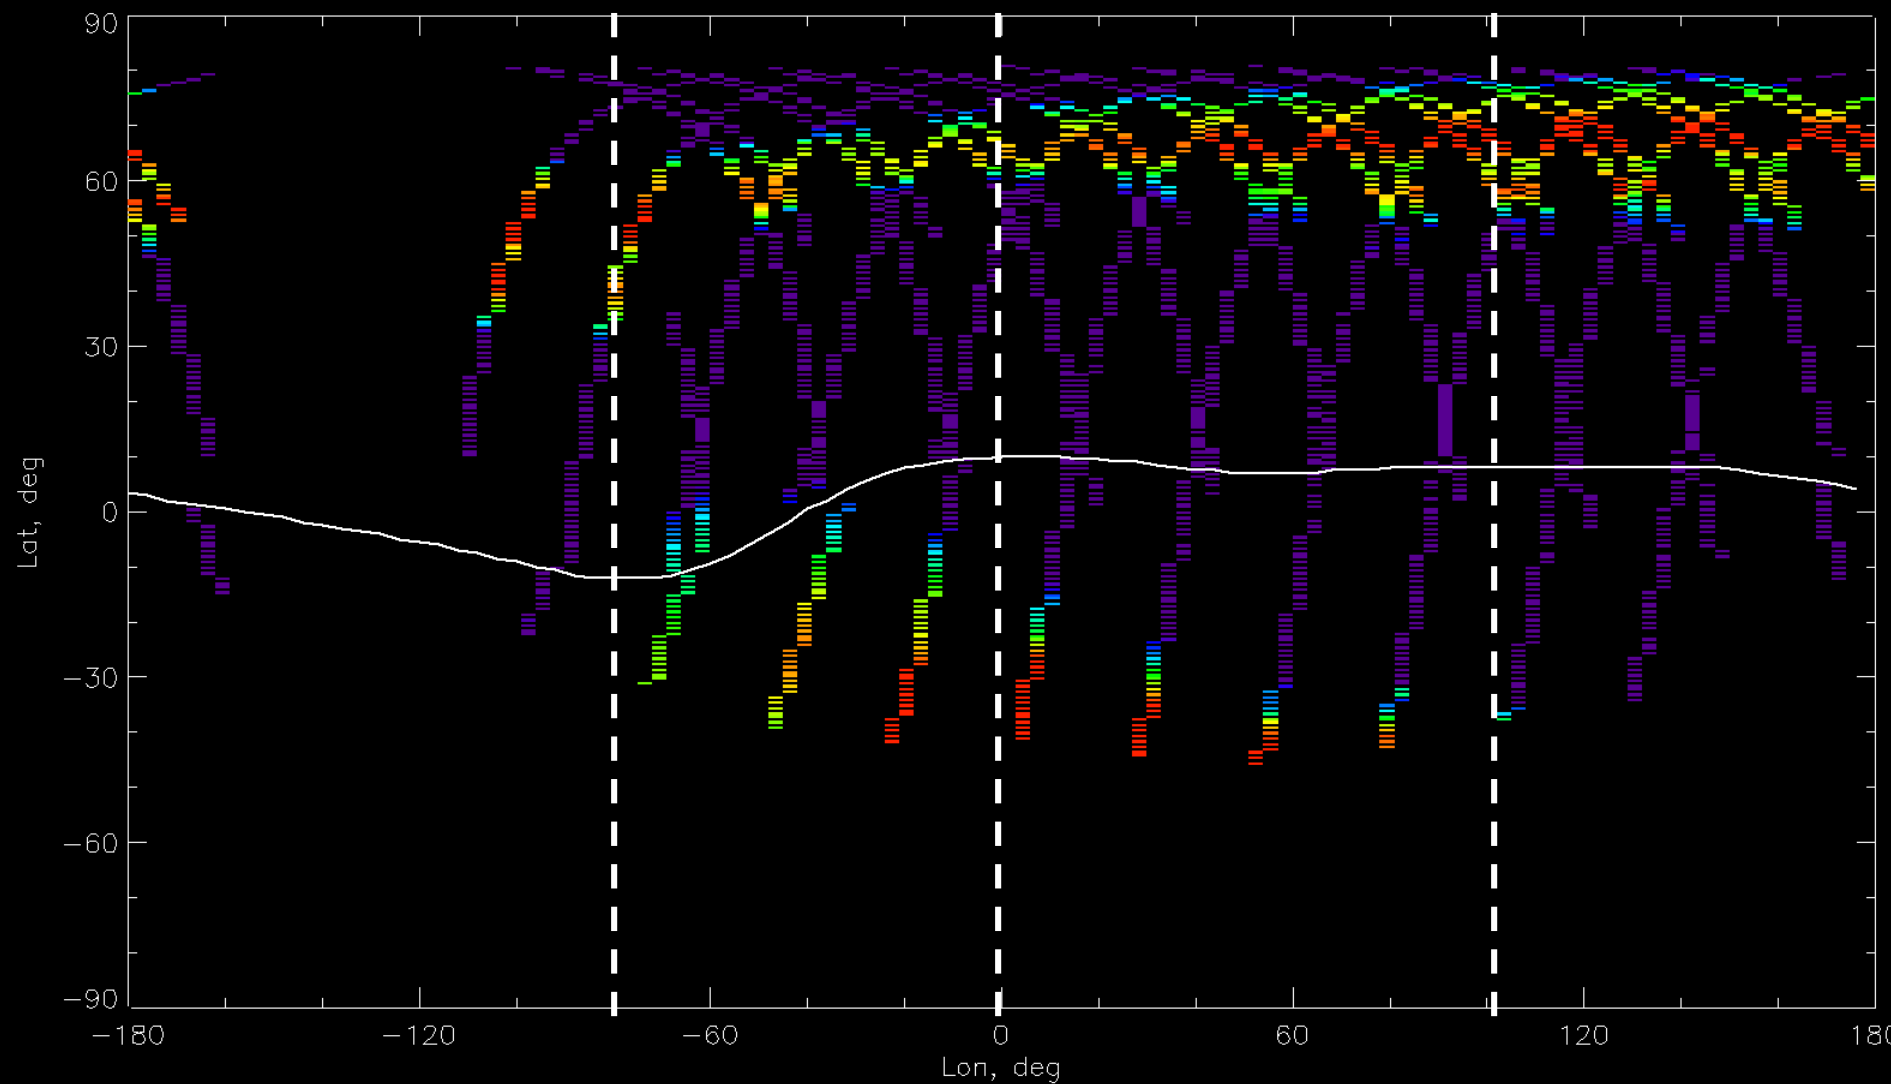

POES  $e > 30$  keV PA=90 avr 2006/08/23 0h - dt=24h

min/max: 1.0E+000/1.0E+005

POES\_mapGsum\_05

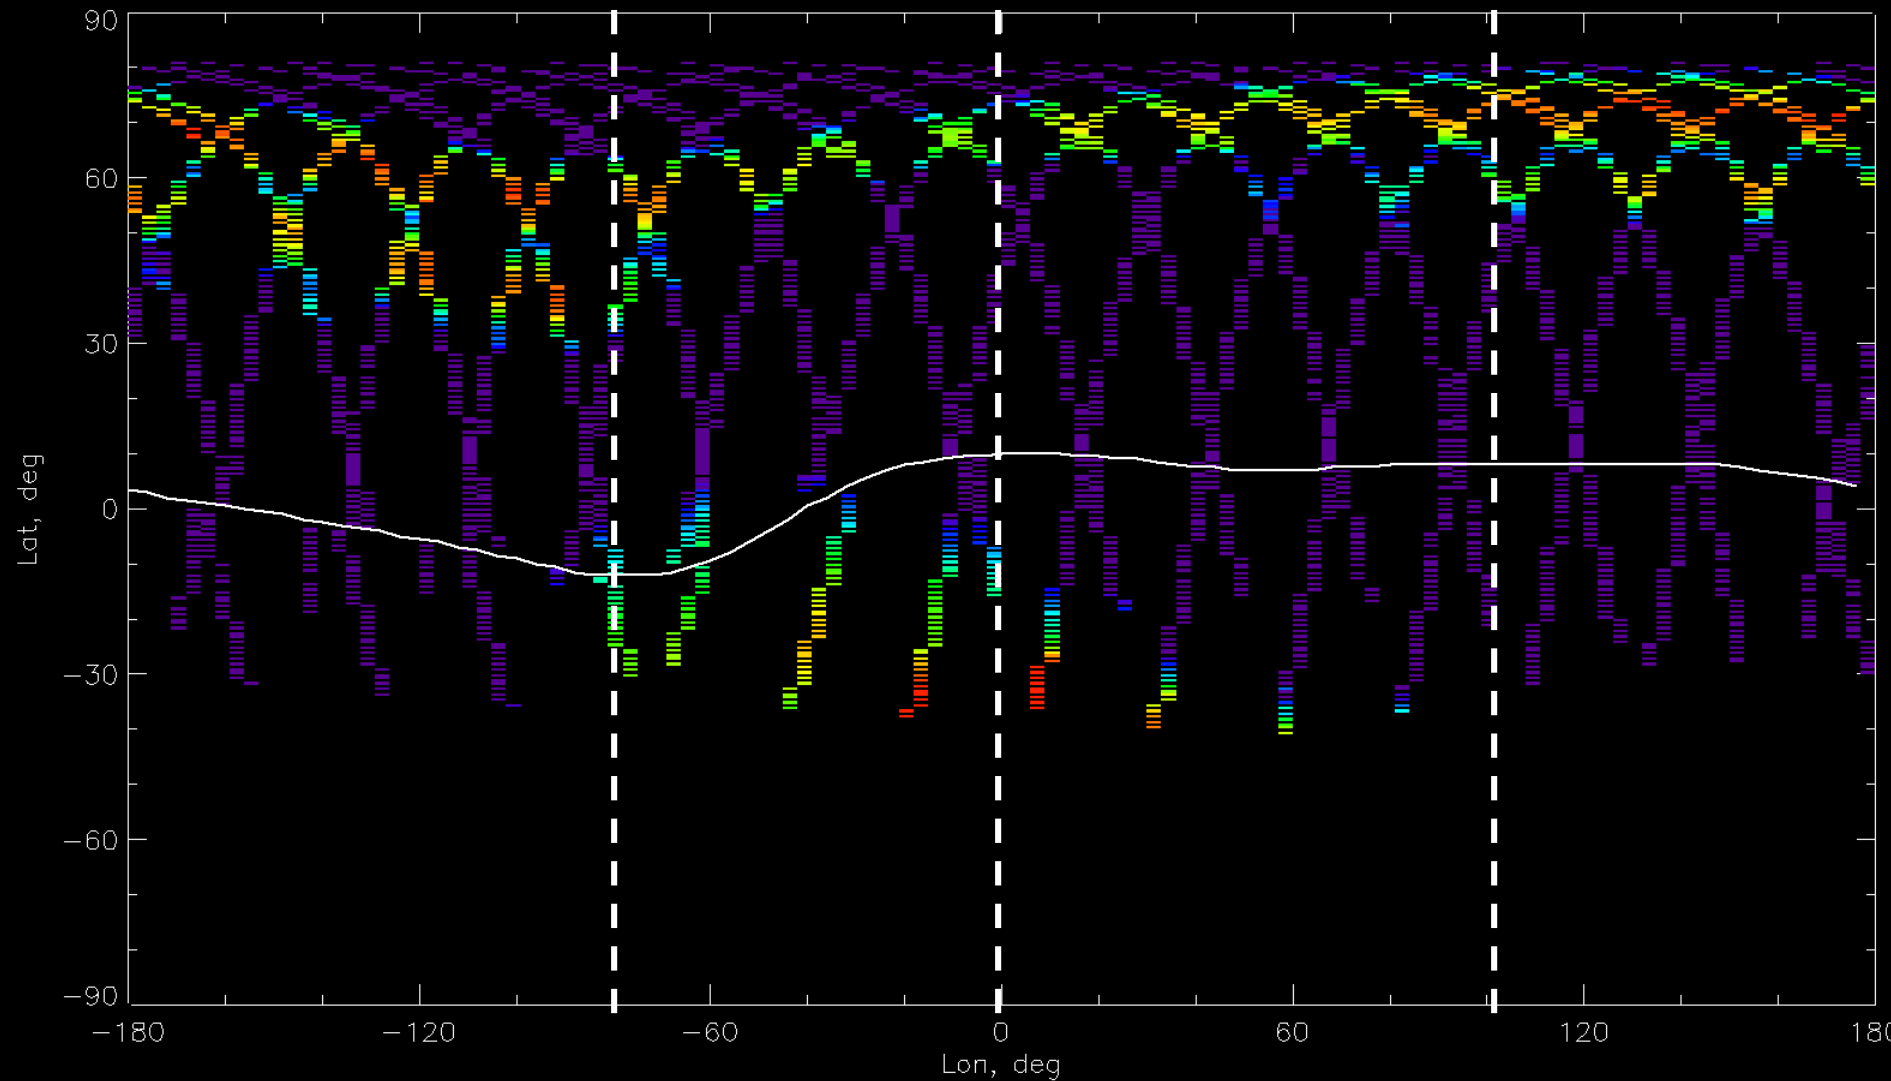

POES e&gt;30 keV PA=90 avr 2008/08/13 0h - dt=24h

min/max: 1.0E+000/1.0E+005

POES\_mapGsum\_05

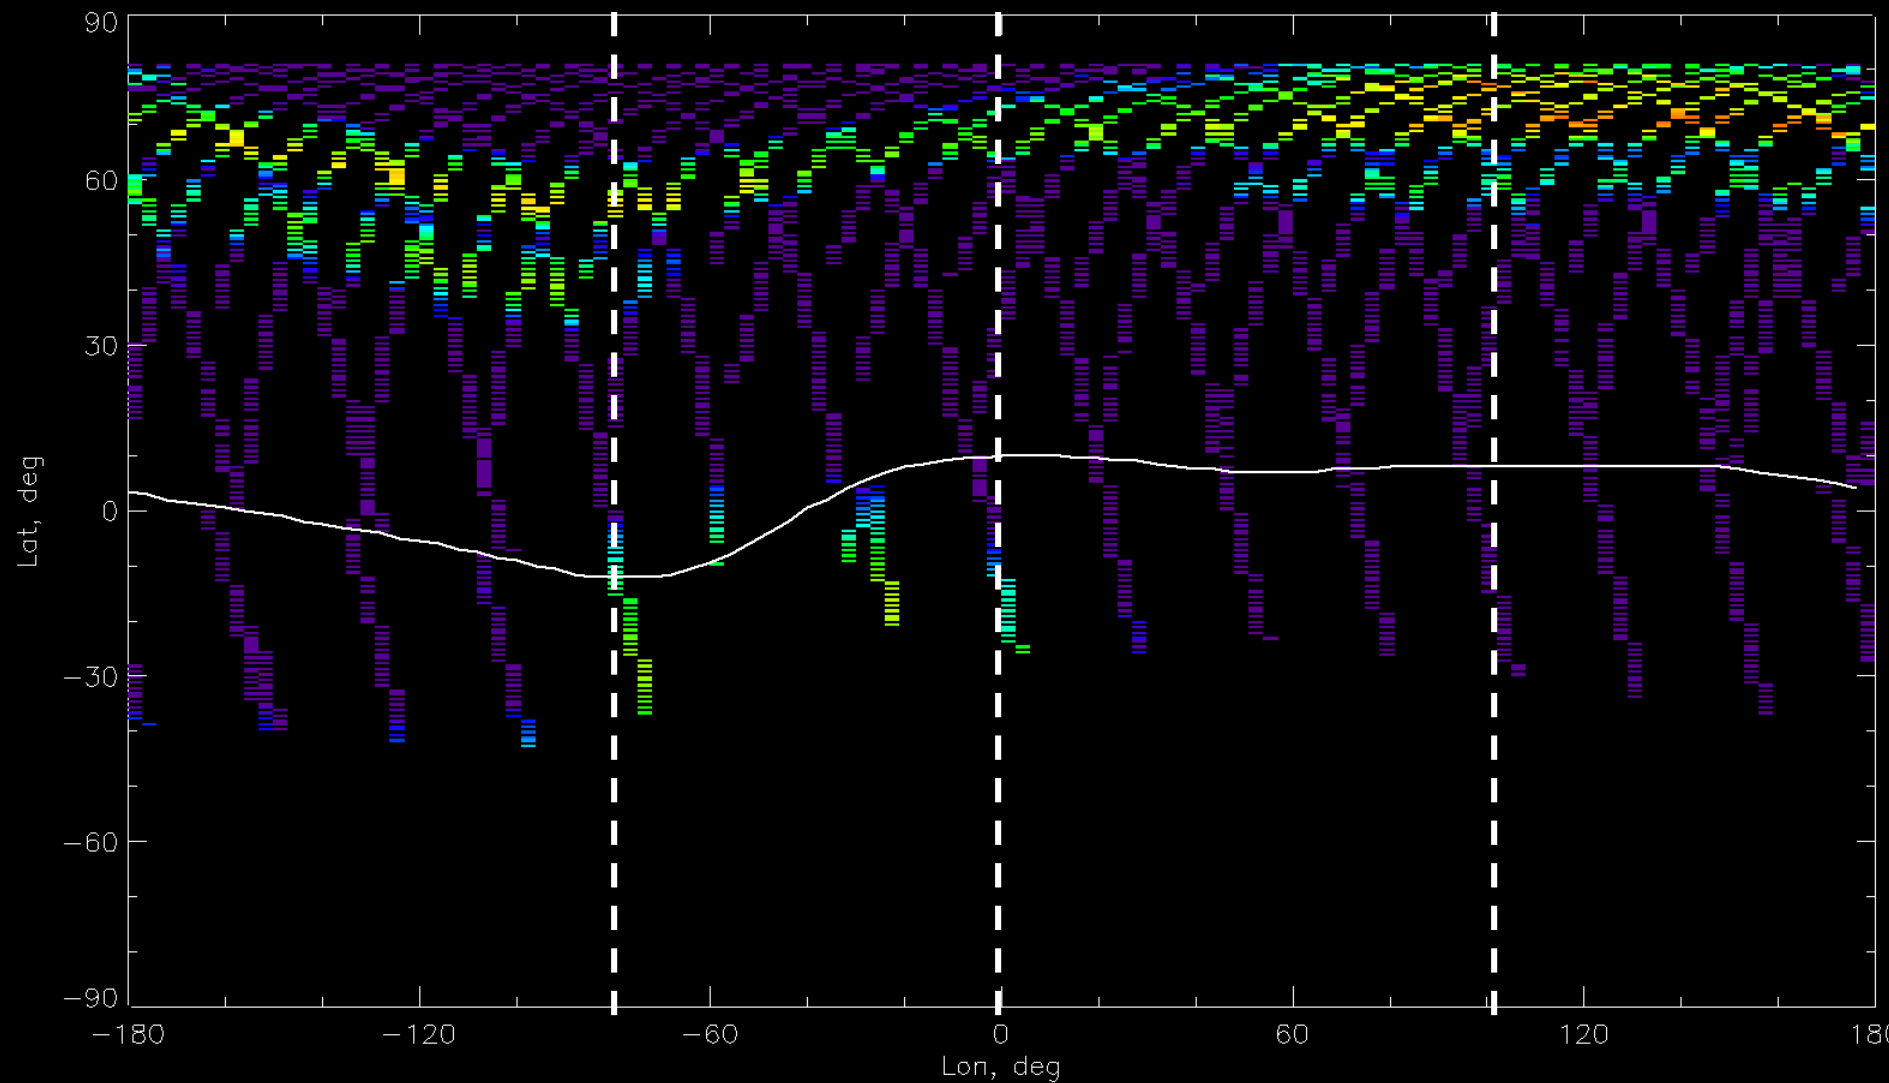



POES  $e > 30$  keV PA=90 avr 2009/08/17 0h - dt=24h

min/max: 1.0E+000/1.0E+005

POES\_mapGsum\_05

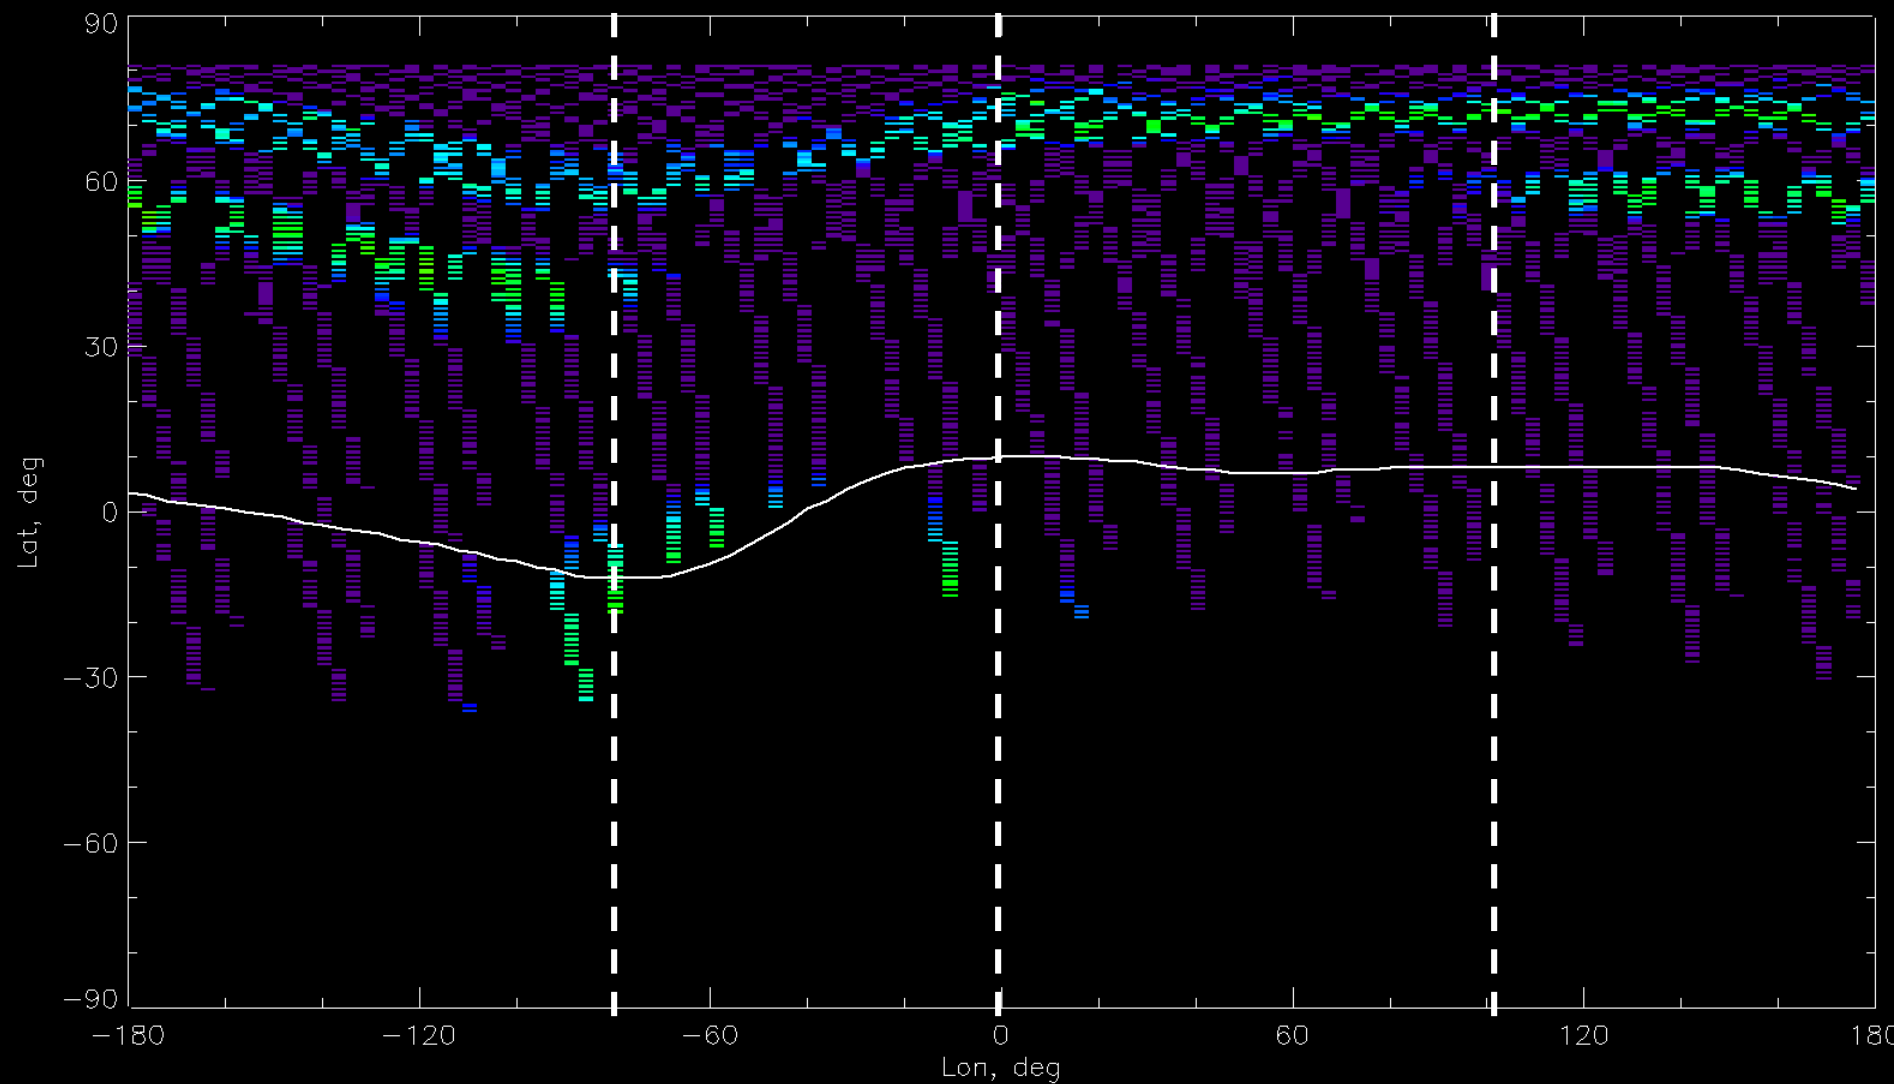

POES  $e > 30$  keV PA=90 avr 2010/08/12 0h - dt=24h

min/max: 1.0E+000/1.0E+005

POES\_mapGsum\_05

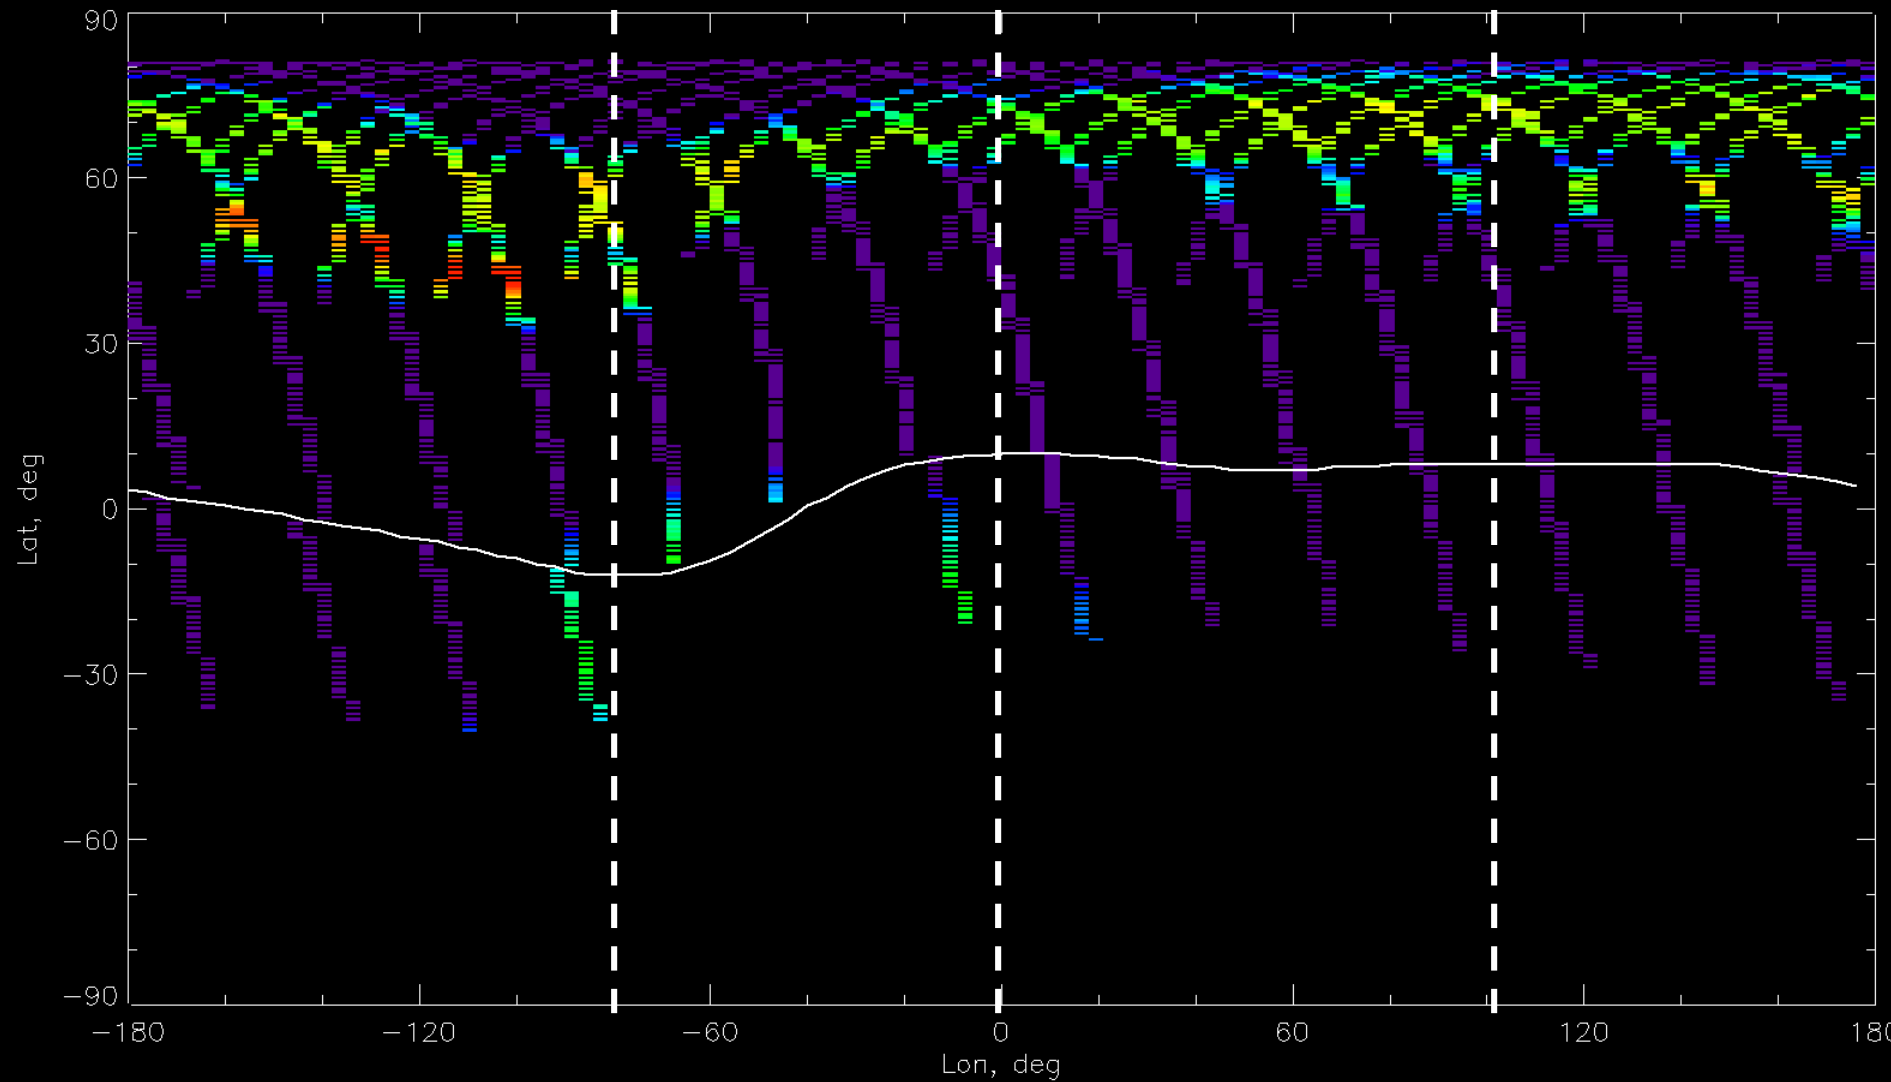

POES  $e > 30$  keV PA=90 avr 2011/08/28 8h - dt=24h

min/max: 1.0E+000/1.0E+005

POES\_mapGsum\_05

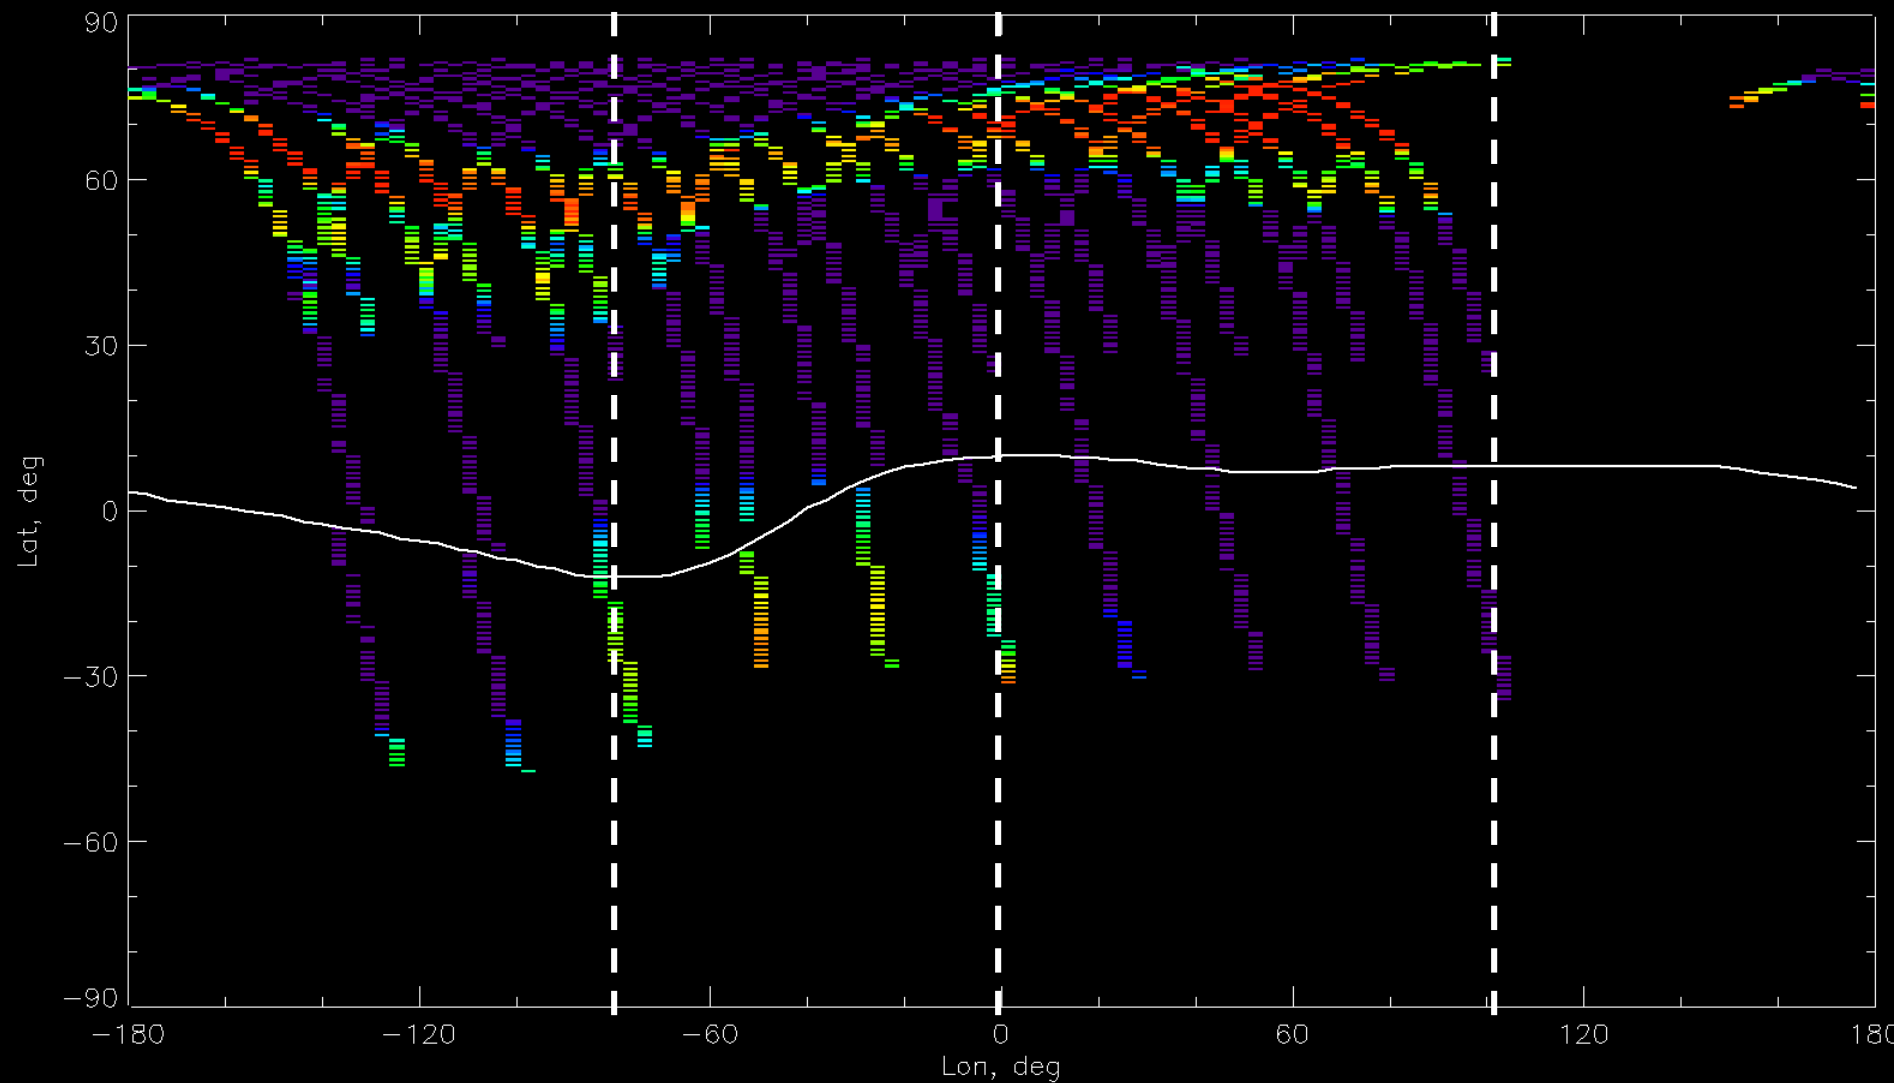

POES  $e > 30$  keV PA=90 avr 2012/08/15 0h - dt=24h

min/max: 1.0E+000/1.0E+005

POES\_mapGsum\_05

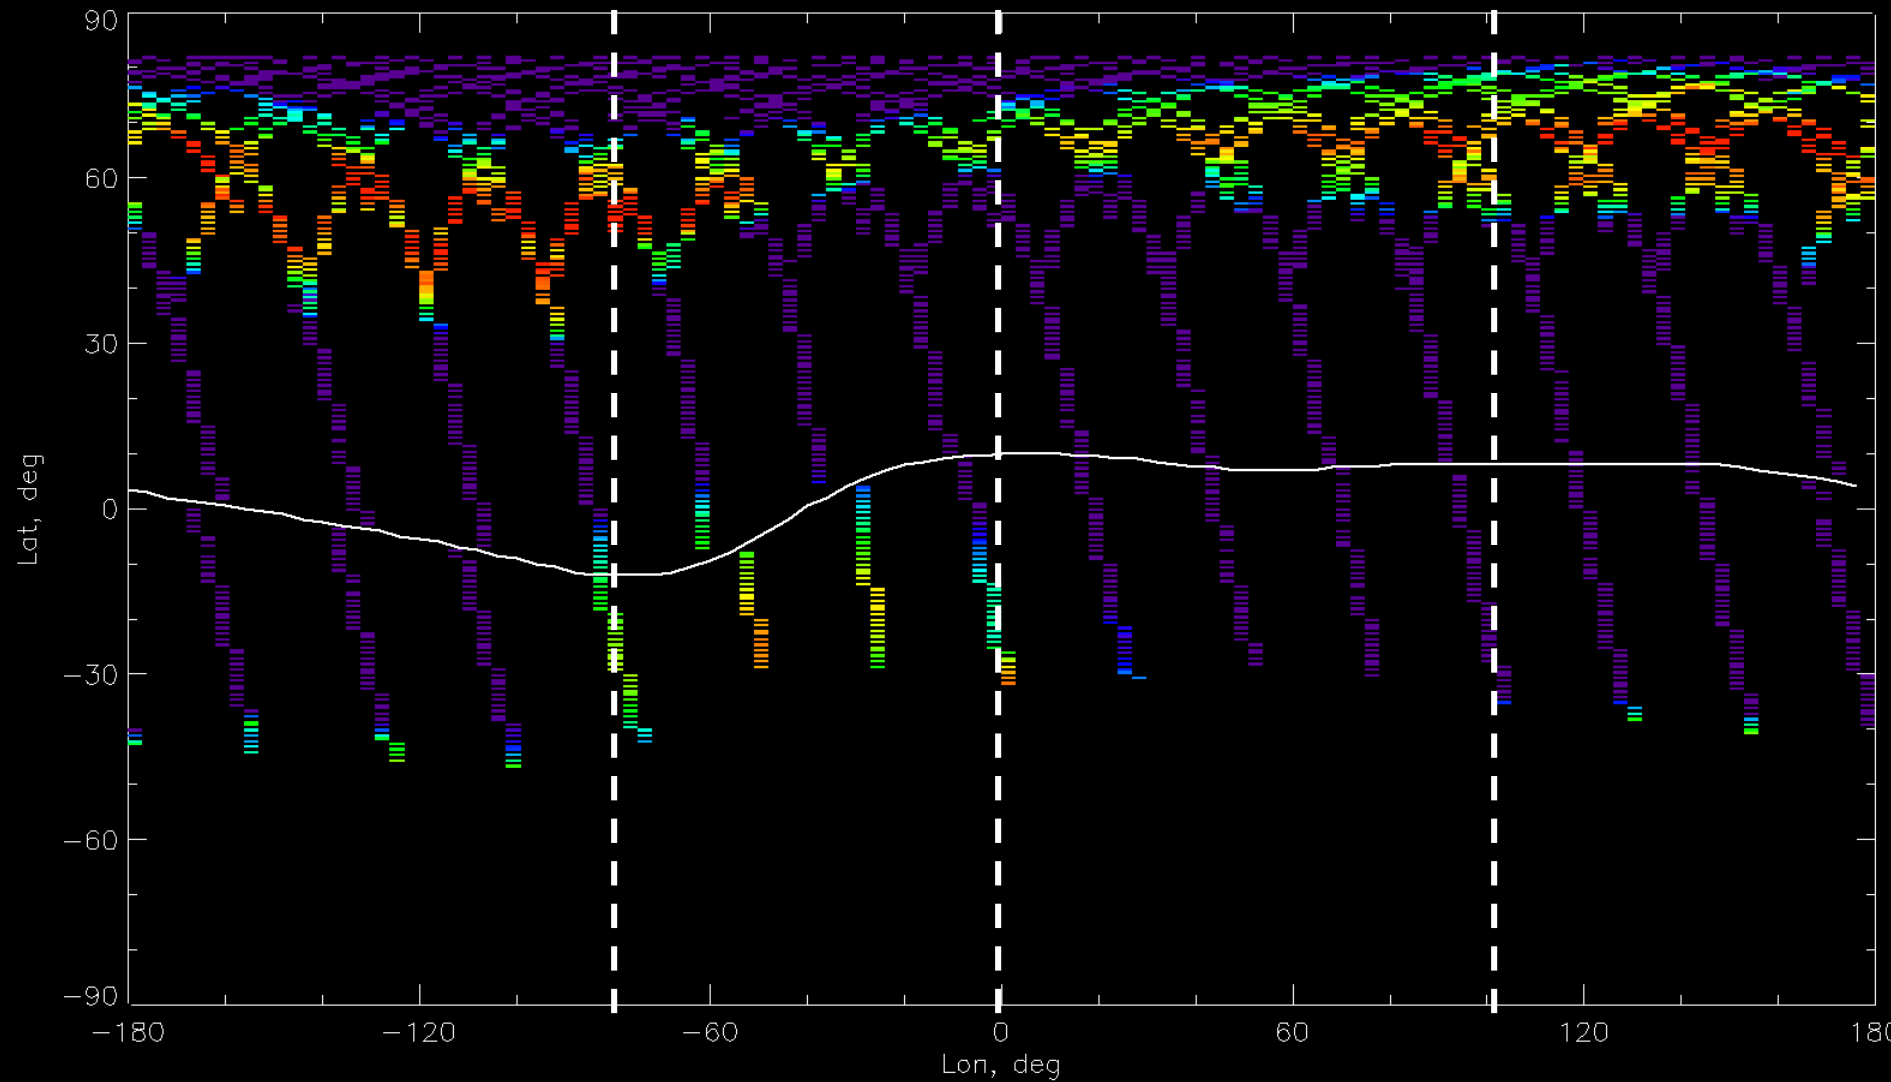

POES e&gt;40 keV PA=90 avr 2013/08/16 0h - dt=24h

min/max: 1.0E+001/1.0E+006

POES\_mapGsum\_05

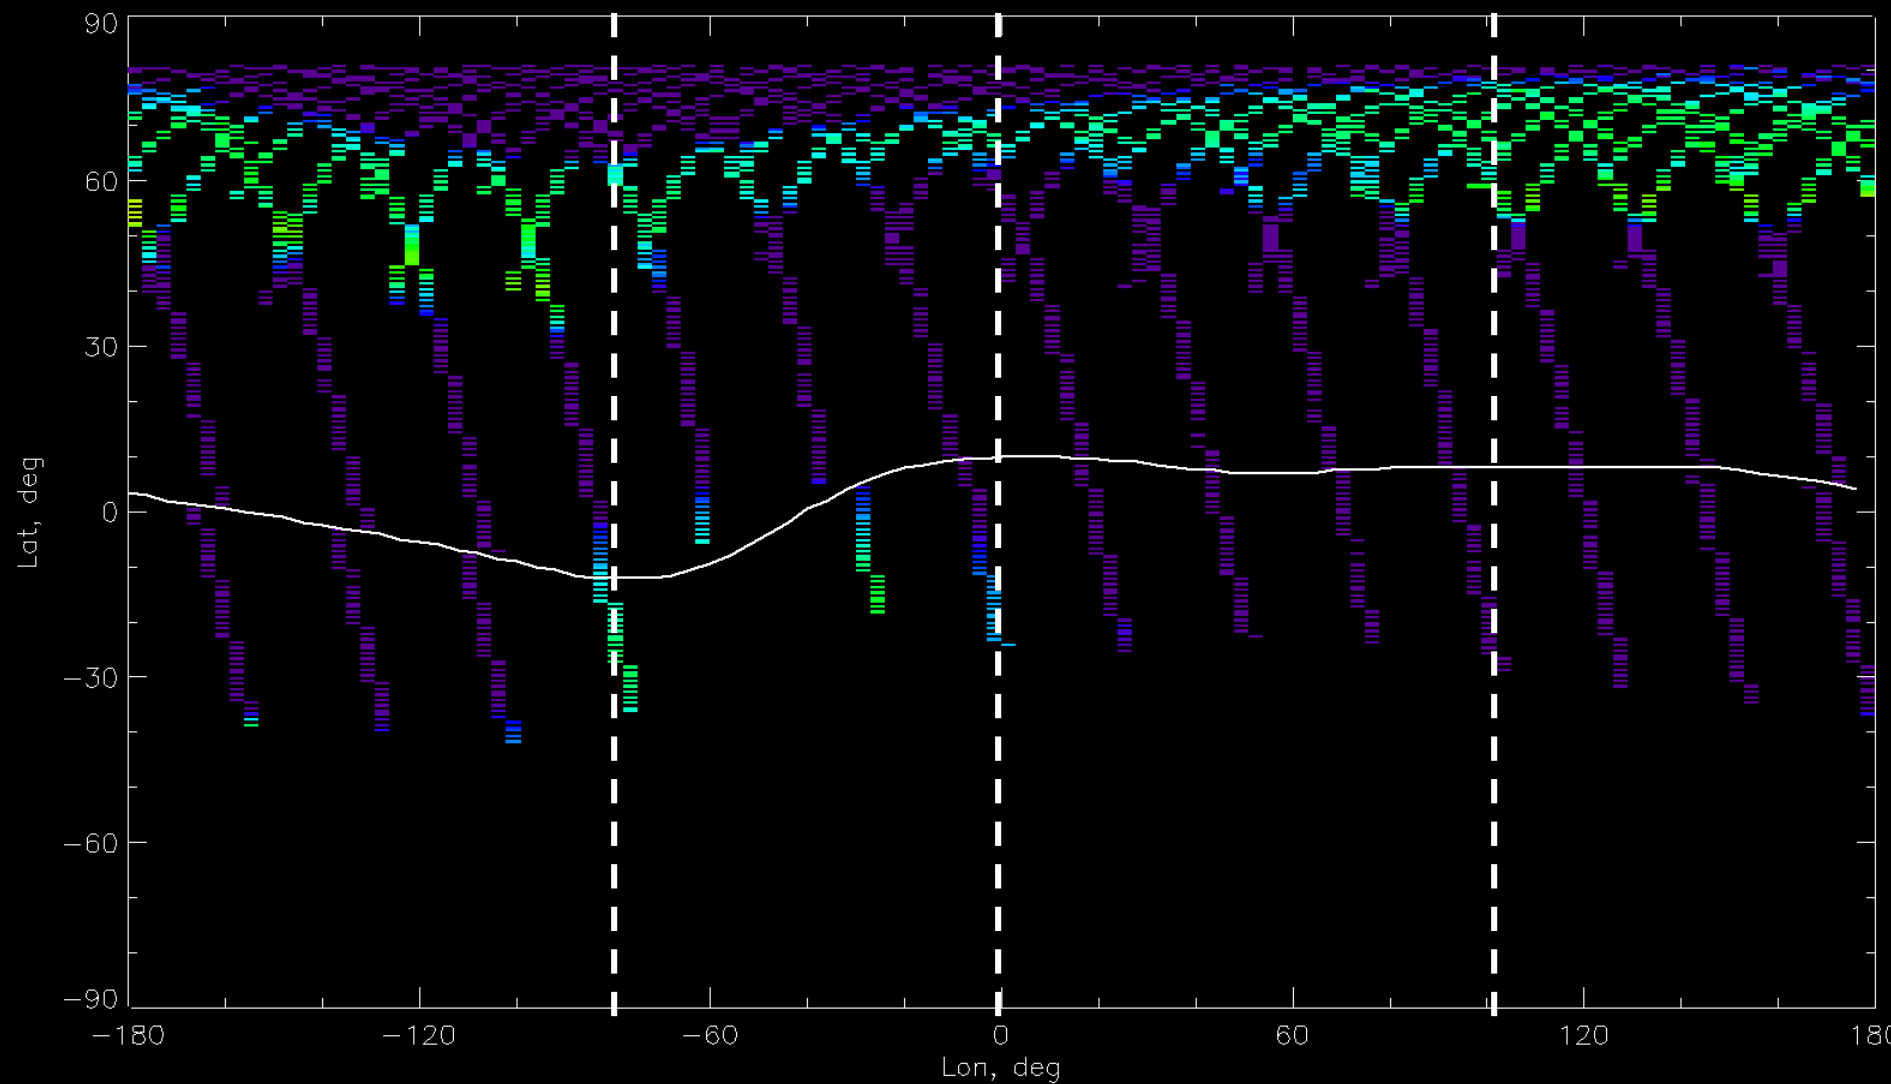

POES e&gt;40 keV PA=90 avr 2014/08/01 0h - dt=36h

min/max: 1.0E+001/1.0E+006

POES\_mapGsum\_05

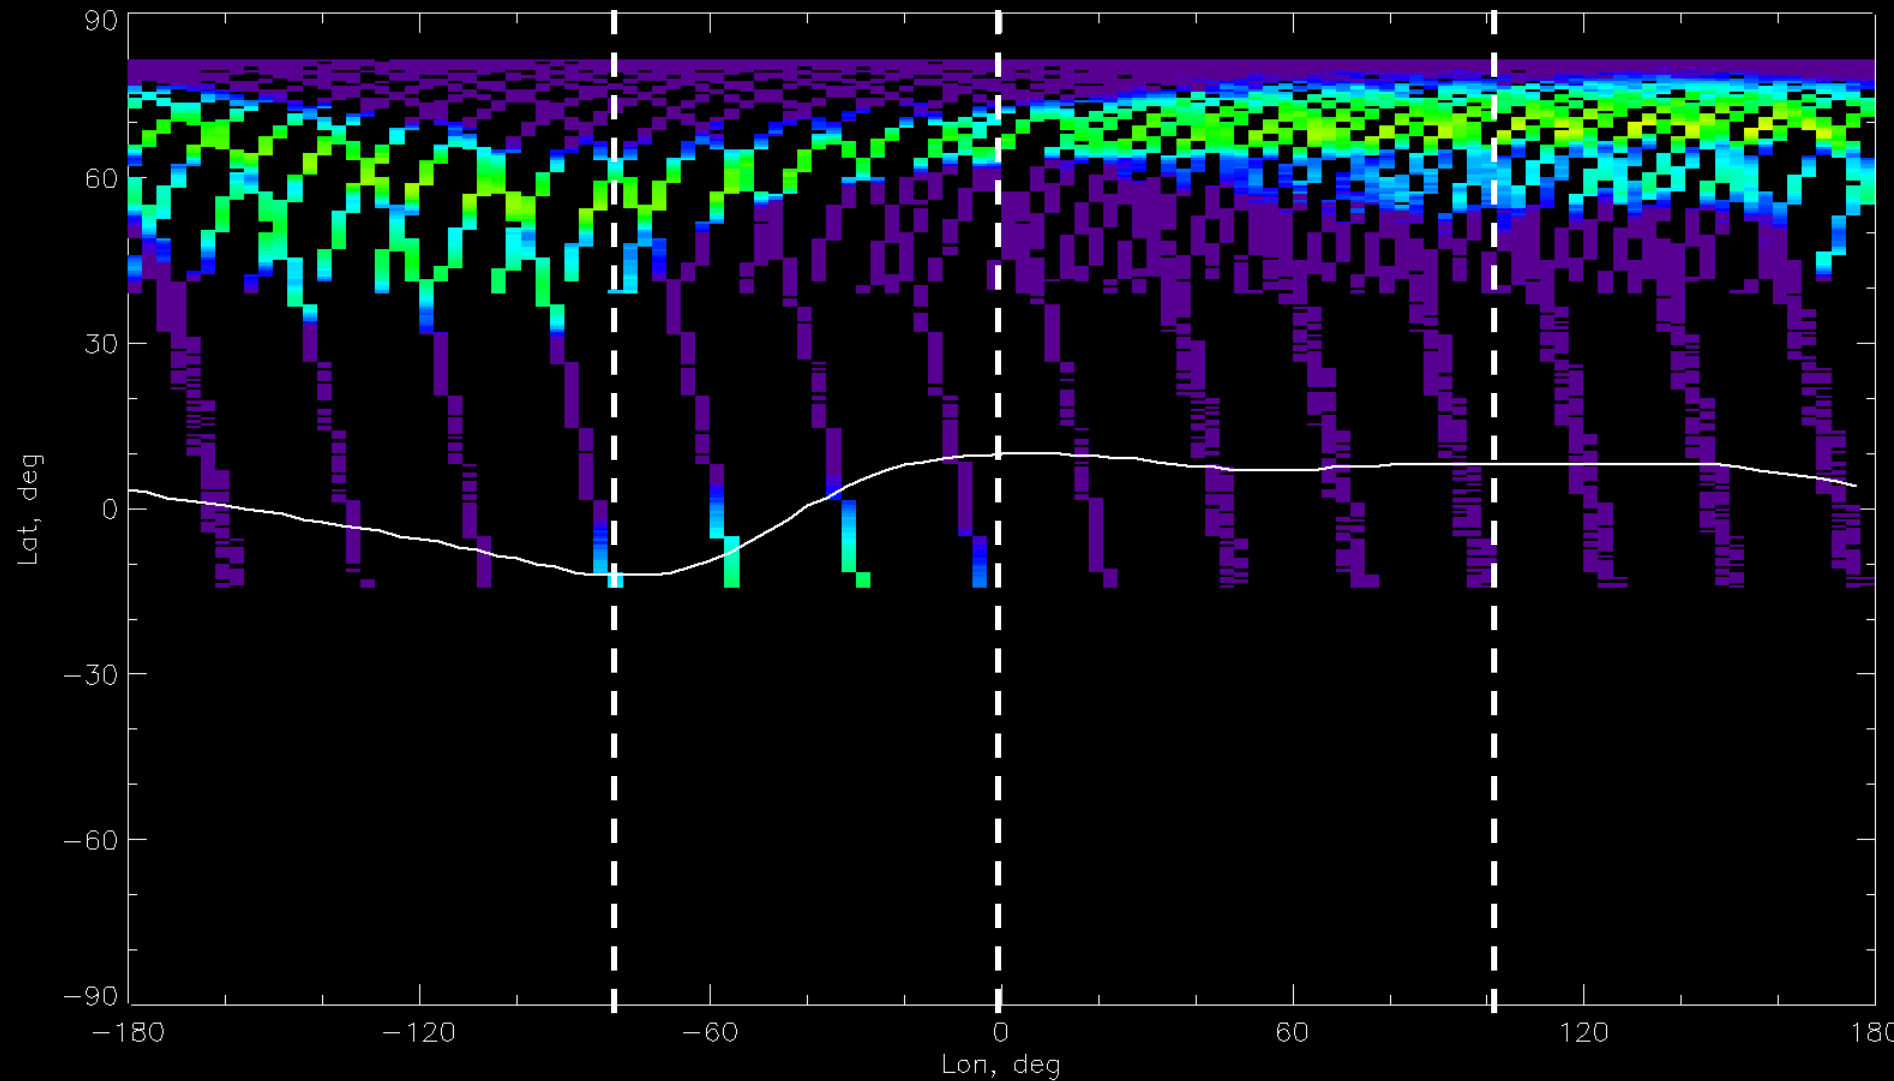

POES  $e > 40$  keV PA=90 avr 2015/08/04 0h - dt=24h

min/max: 1.0E+001/1.0E+006

POES\_mapGsum\_05

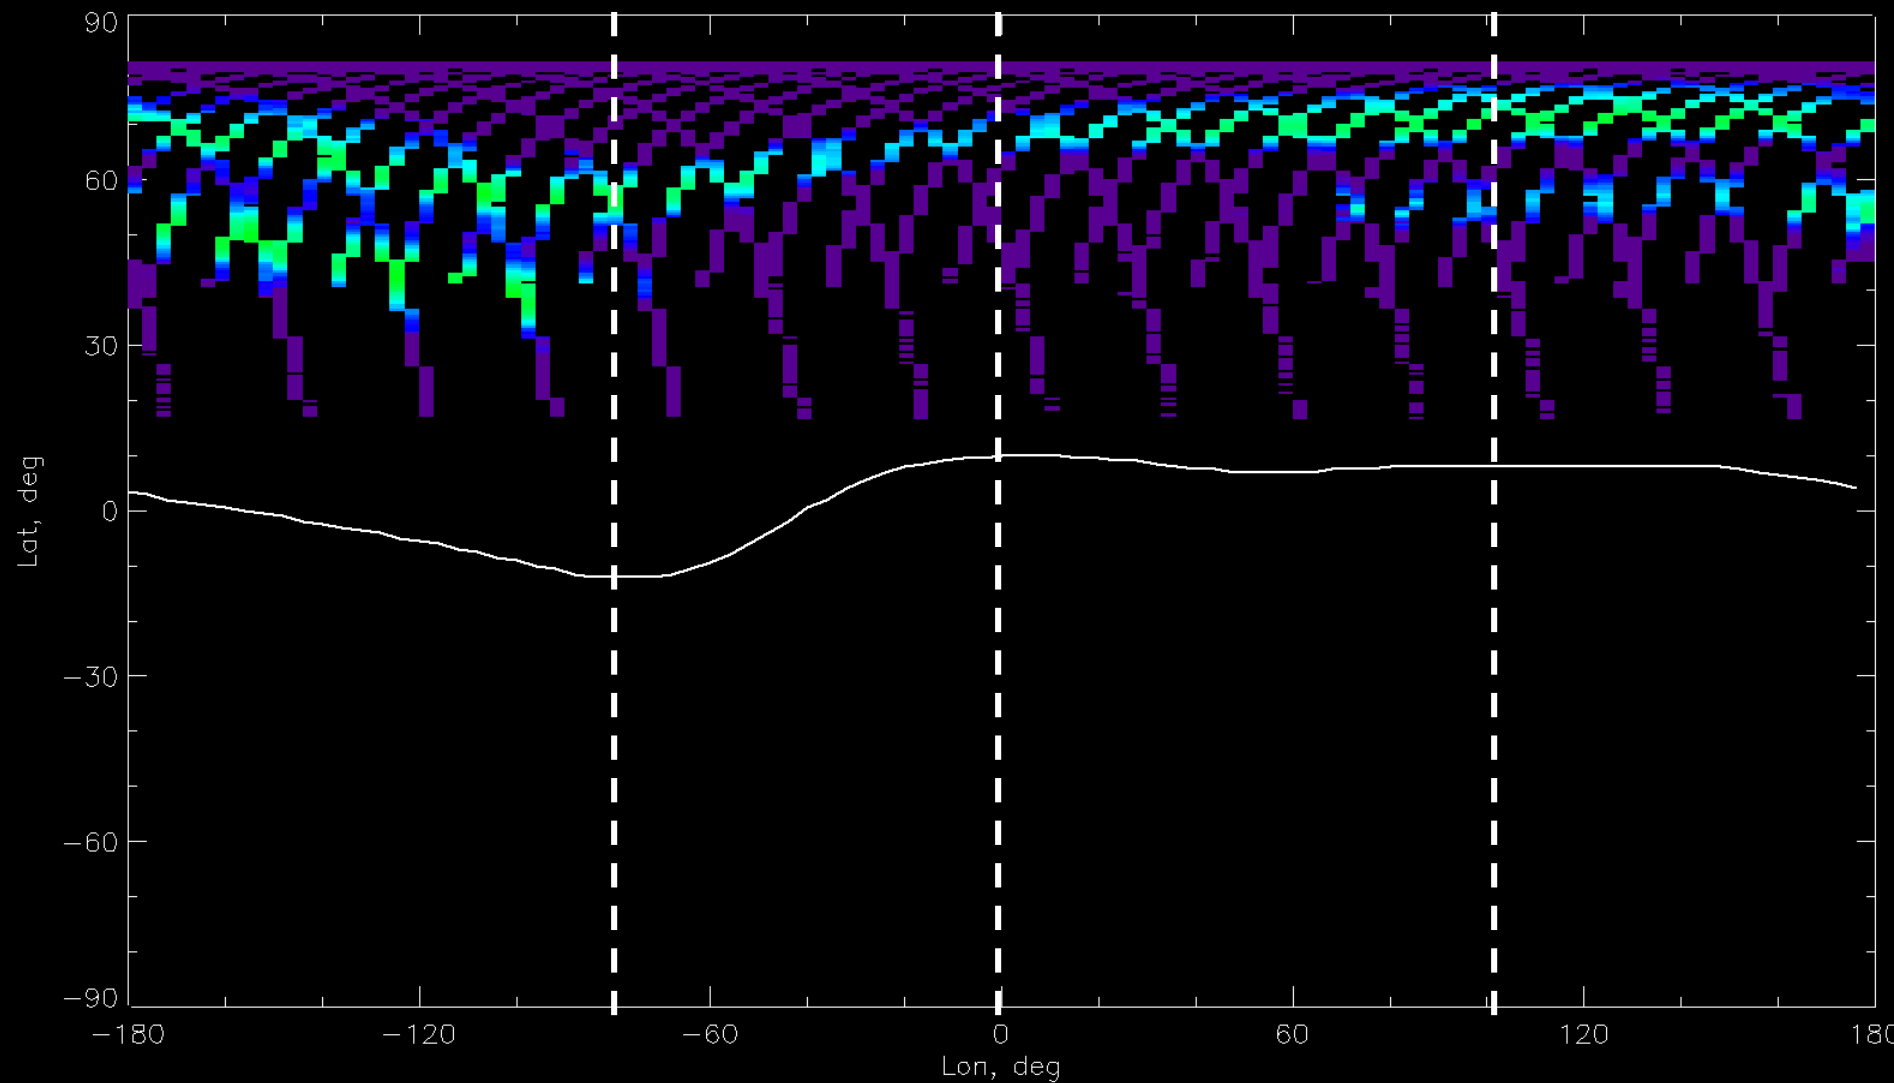

POES e &gt; 30 keV PA=90 avr 2016/06/03 0h - dt=24h

min/max: 3.0E+001/3.0E+006

POES\_mapGsum\_05

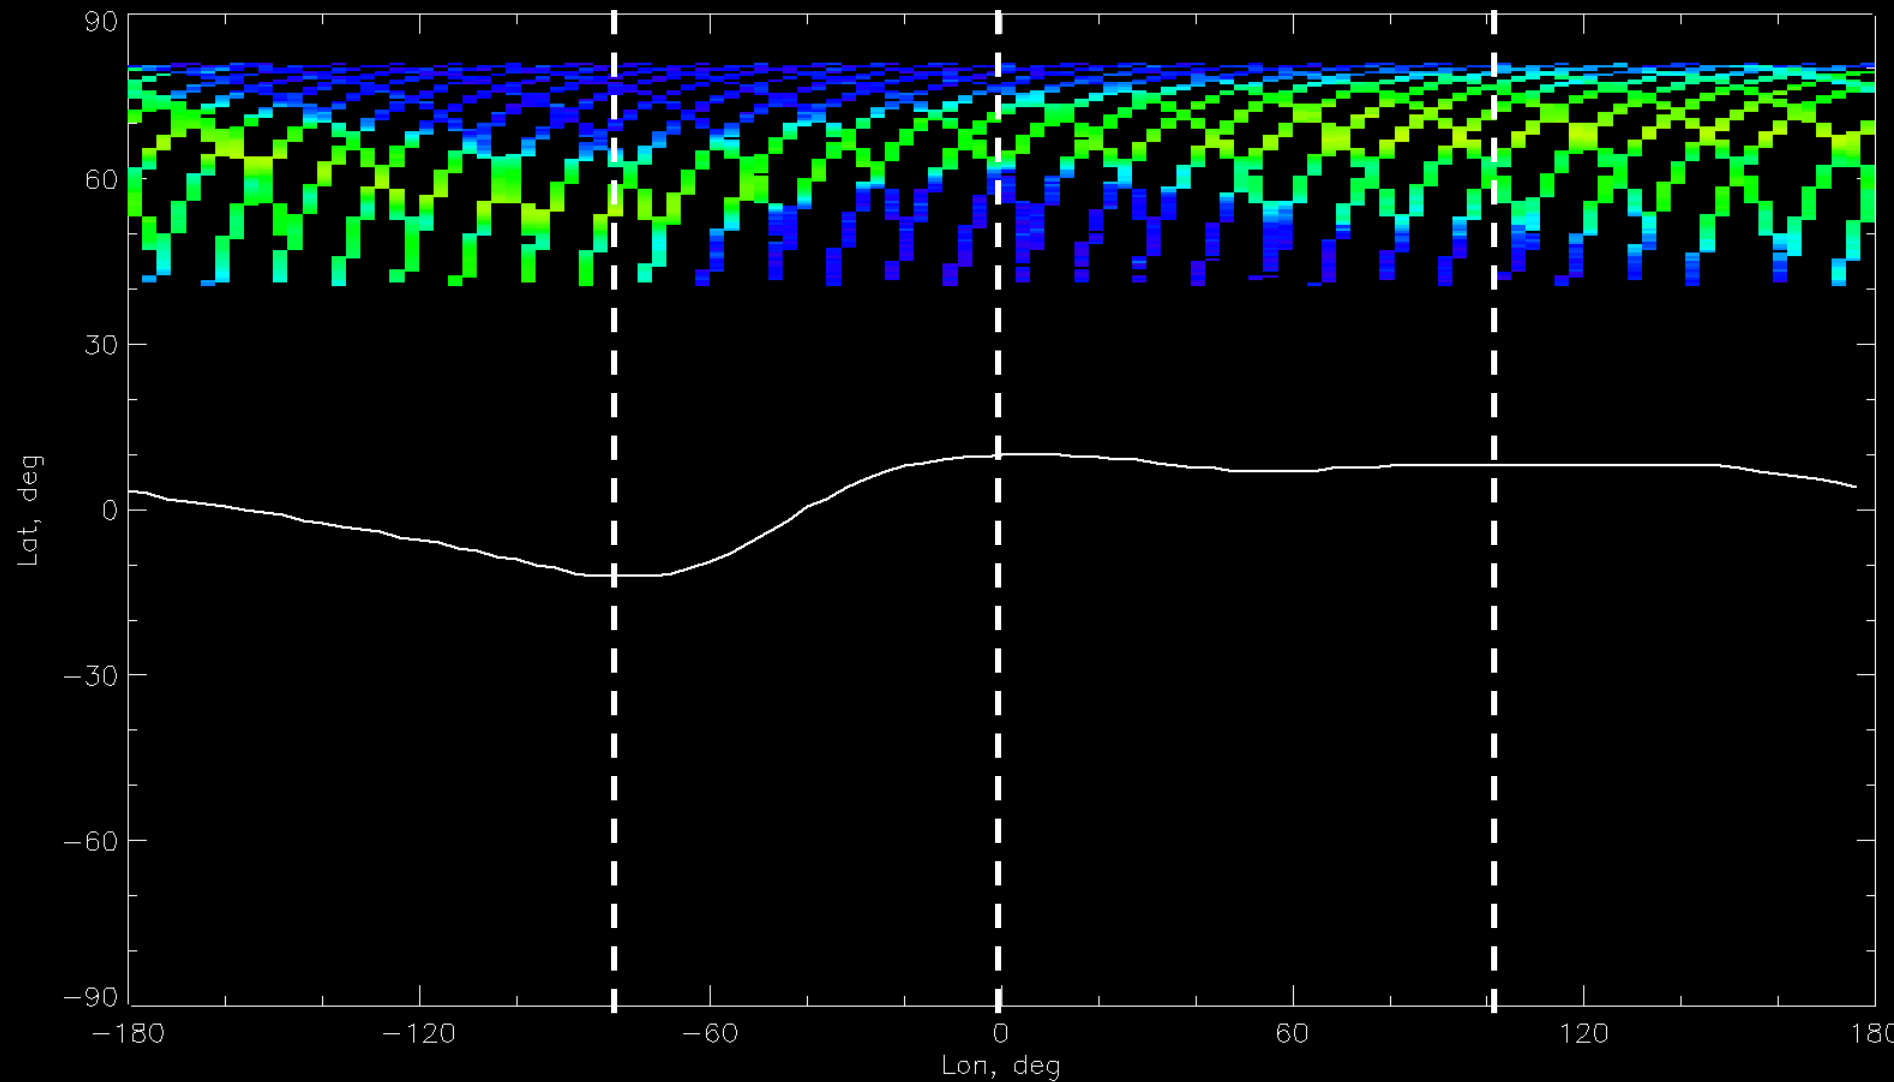



POES e&gt;40 keV PA=90 avr 2017/08/09 8h - dt=24h

min/max: 1.0E+000/1.0E+005

POES\_mapGsum\_05

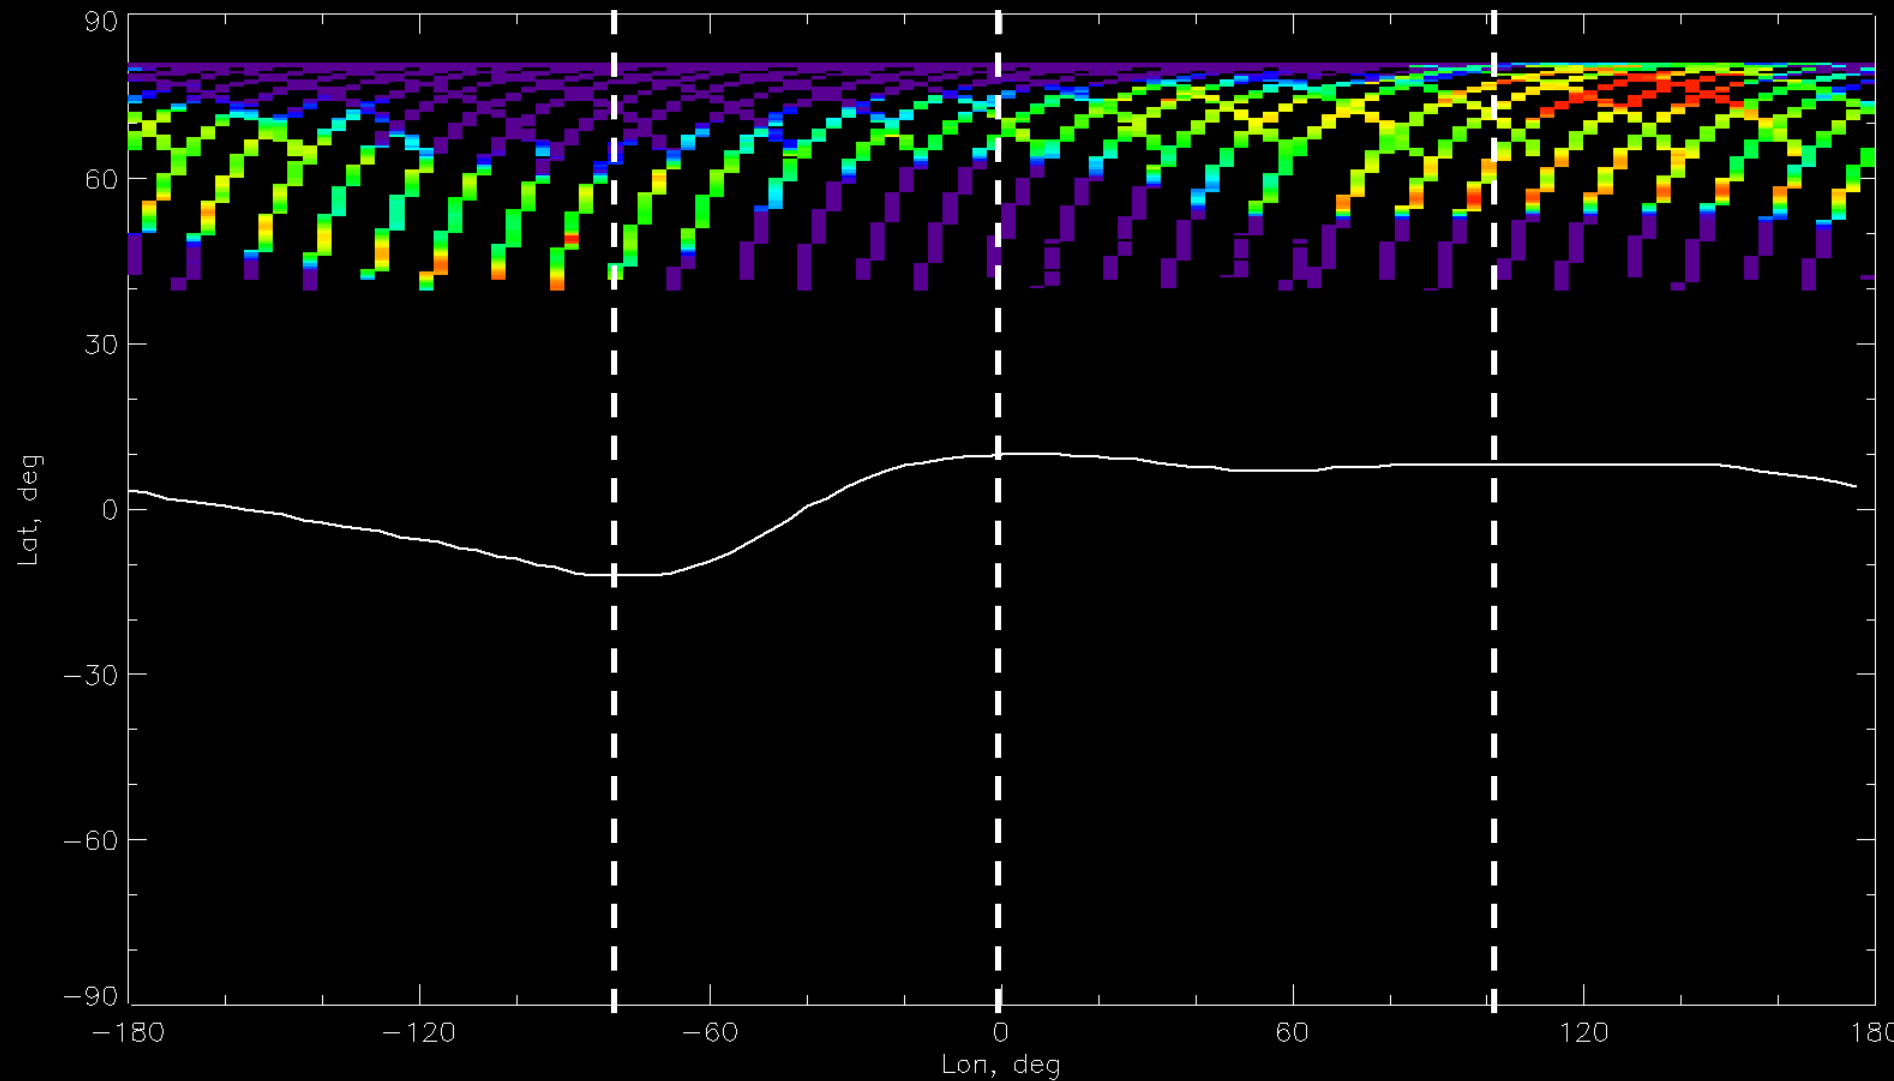

POES e &gt; 30 keV PA=90 avr 2018/06/12 08h - dt=24h

min/max: 1.0E+003/1.0E+006

POES\_mapGsum\_05

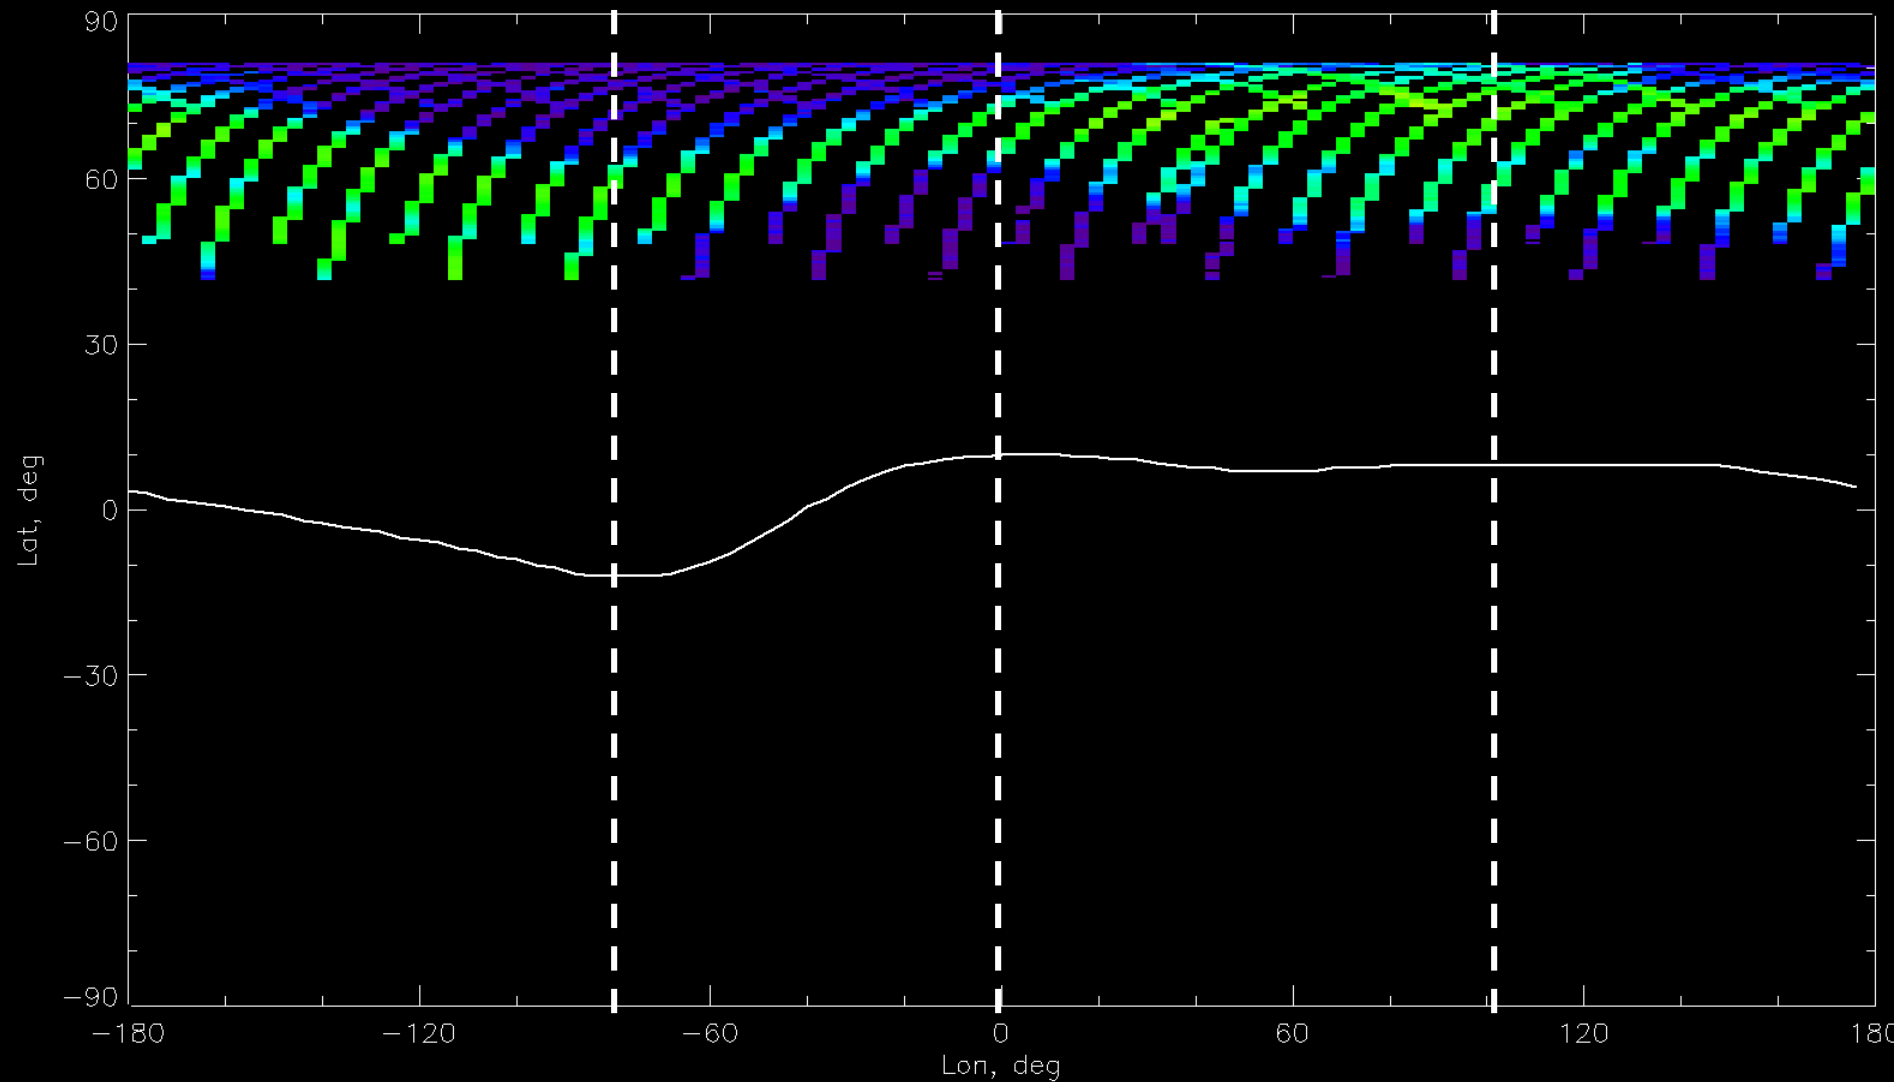

# Set map100

POES e > 100 keV PA=90 avr 2001/06/29 0h - dt=24h

min/max: 1.0E+003/1.0E+006

POES\_mapGsum\_05

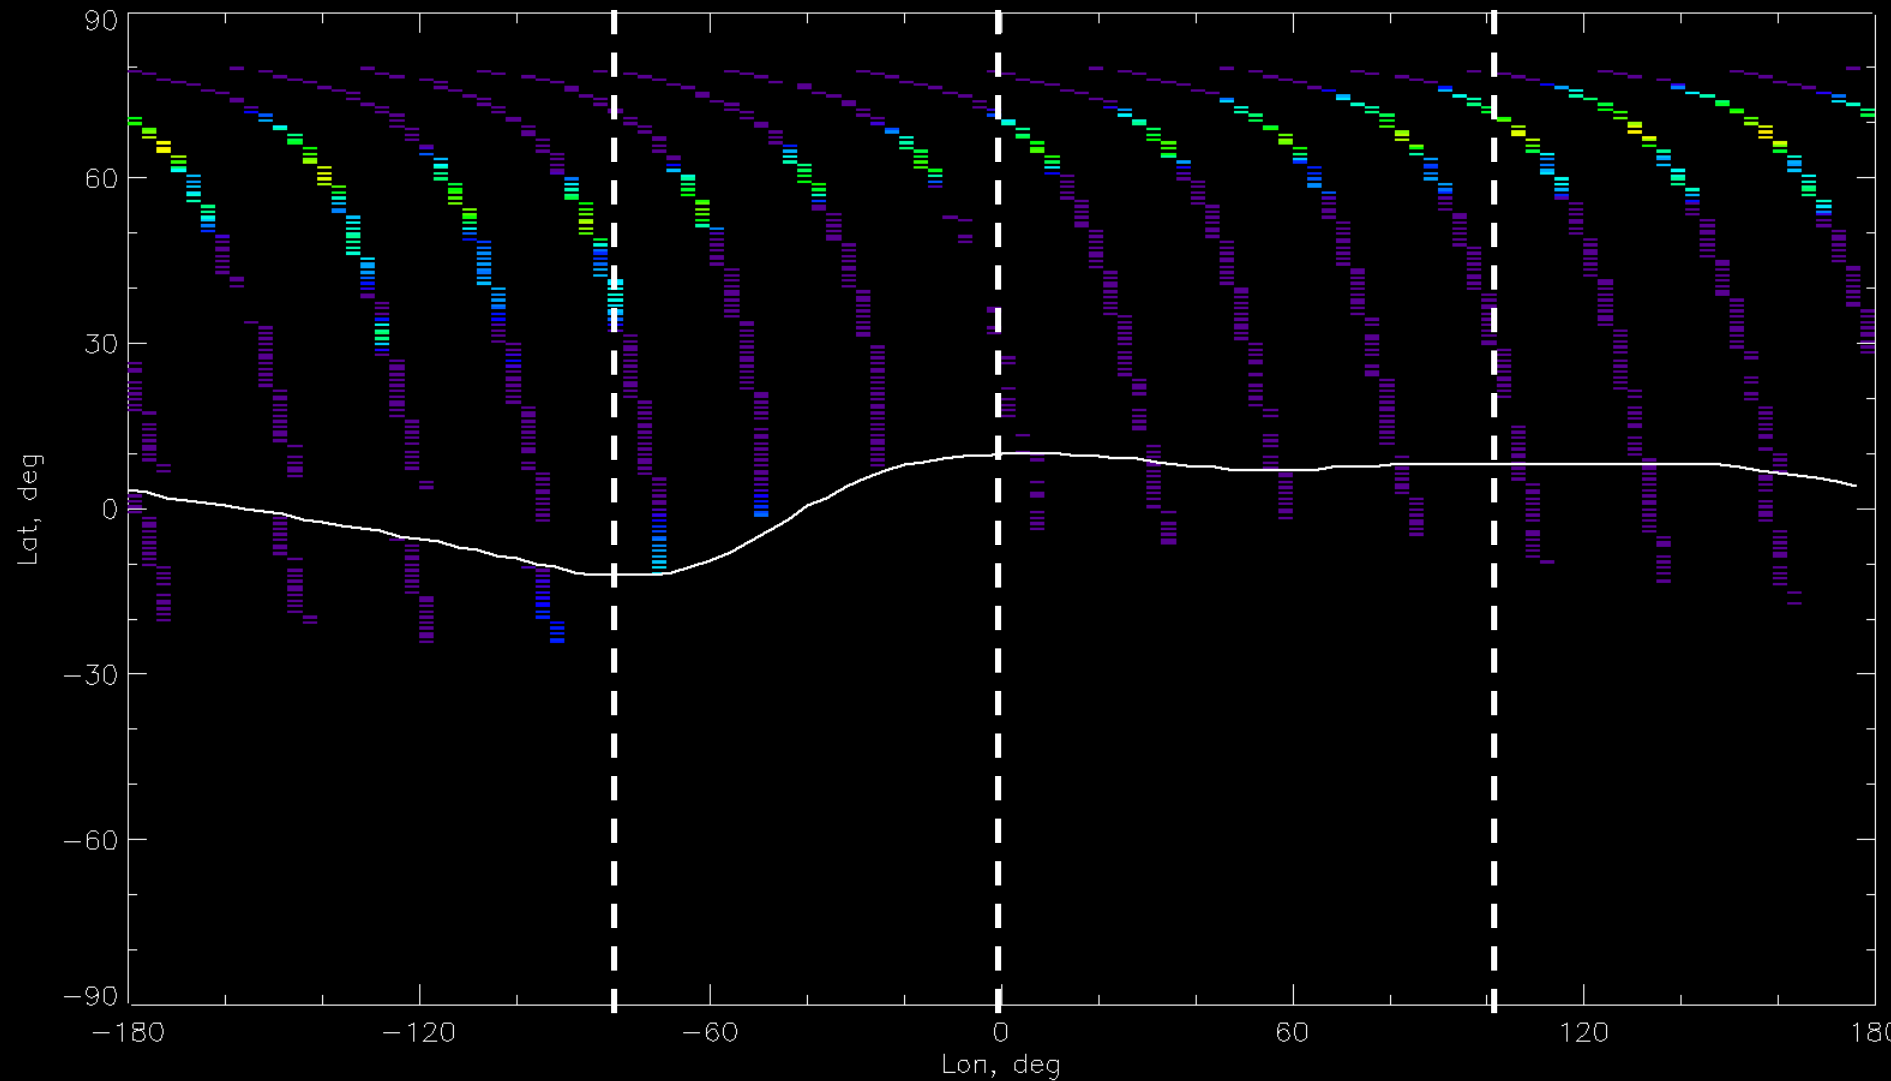

POES e &gt; 100 keV PA=90 avr 2002/06/28 0h - dt=24h

min/max: 1.0E+003/1.0E+006

POES\_map3sum\_05

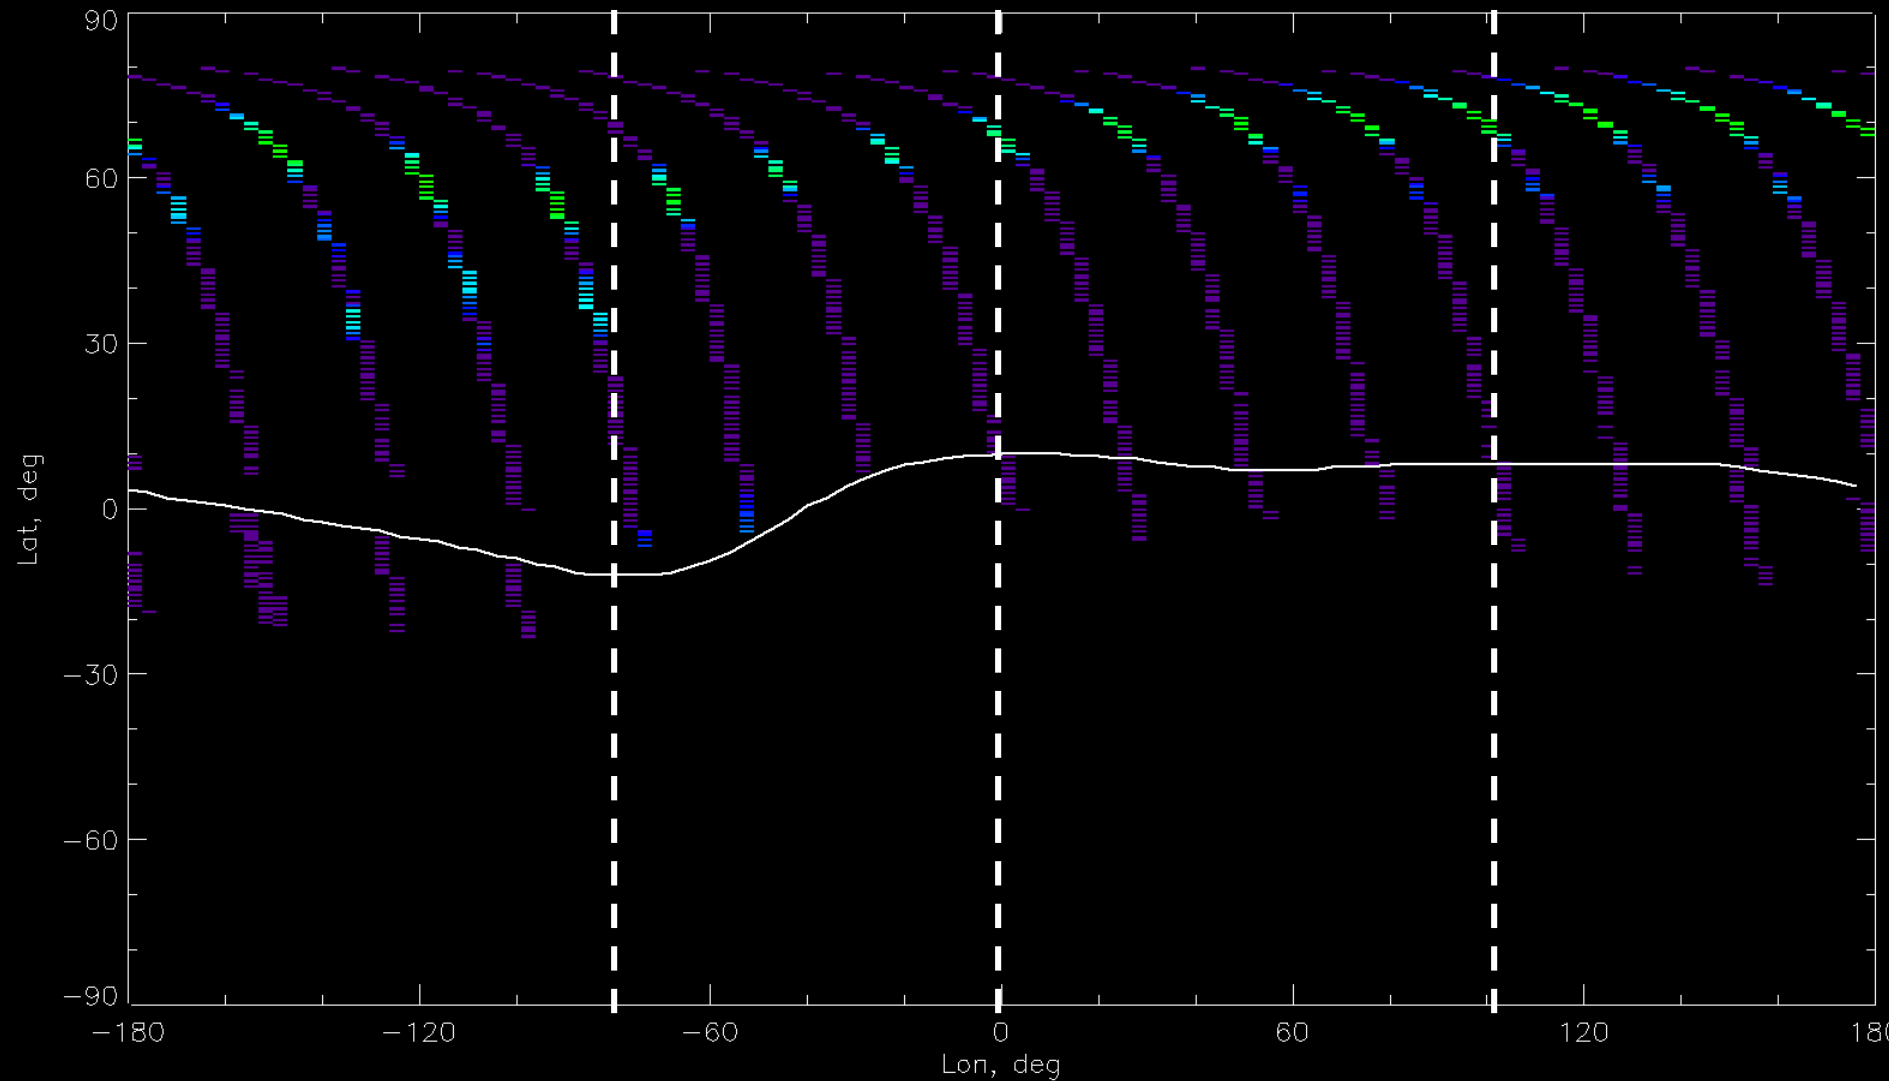

POES e &gt; 100 keV PA=90 avr 2004/06/24 12h - dt=24h

min/max: 1.0E+003/1.0E+006

POES\_mapGsum\_05

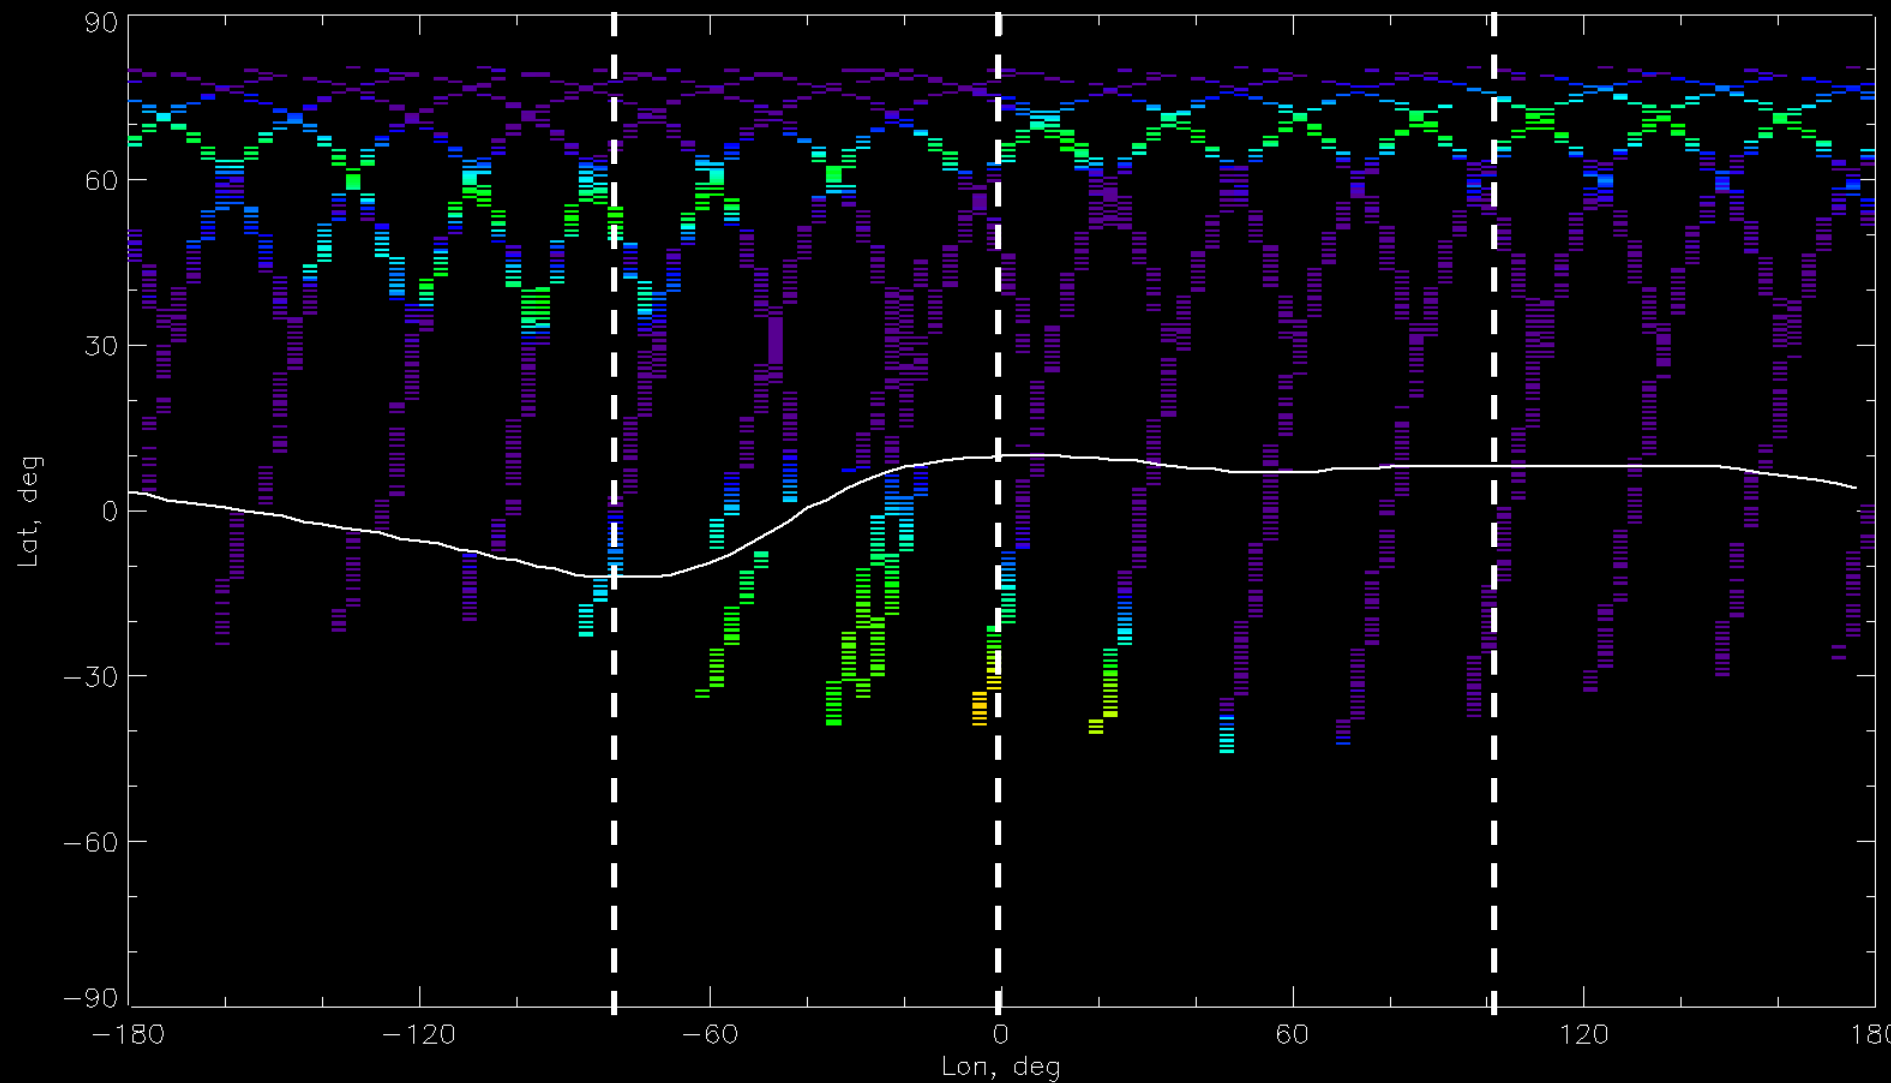

POES e &gt; 100 keV PA=90 avr 2005/06/21 0h - dt=18h

min/max: 1.0E+003/1.0E+006

POES\_mapGsum\_05

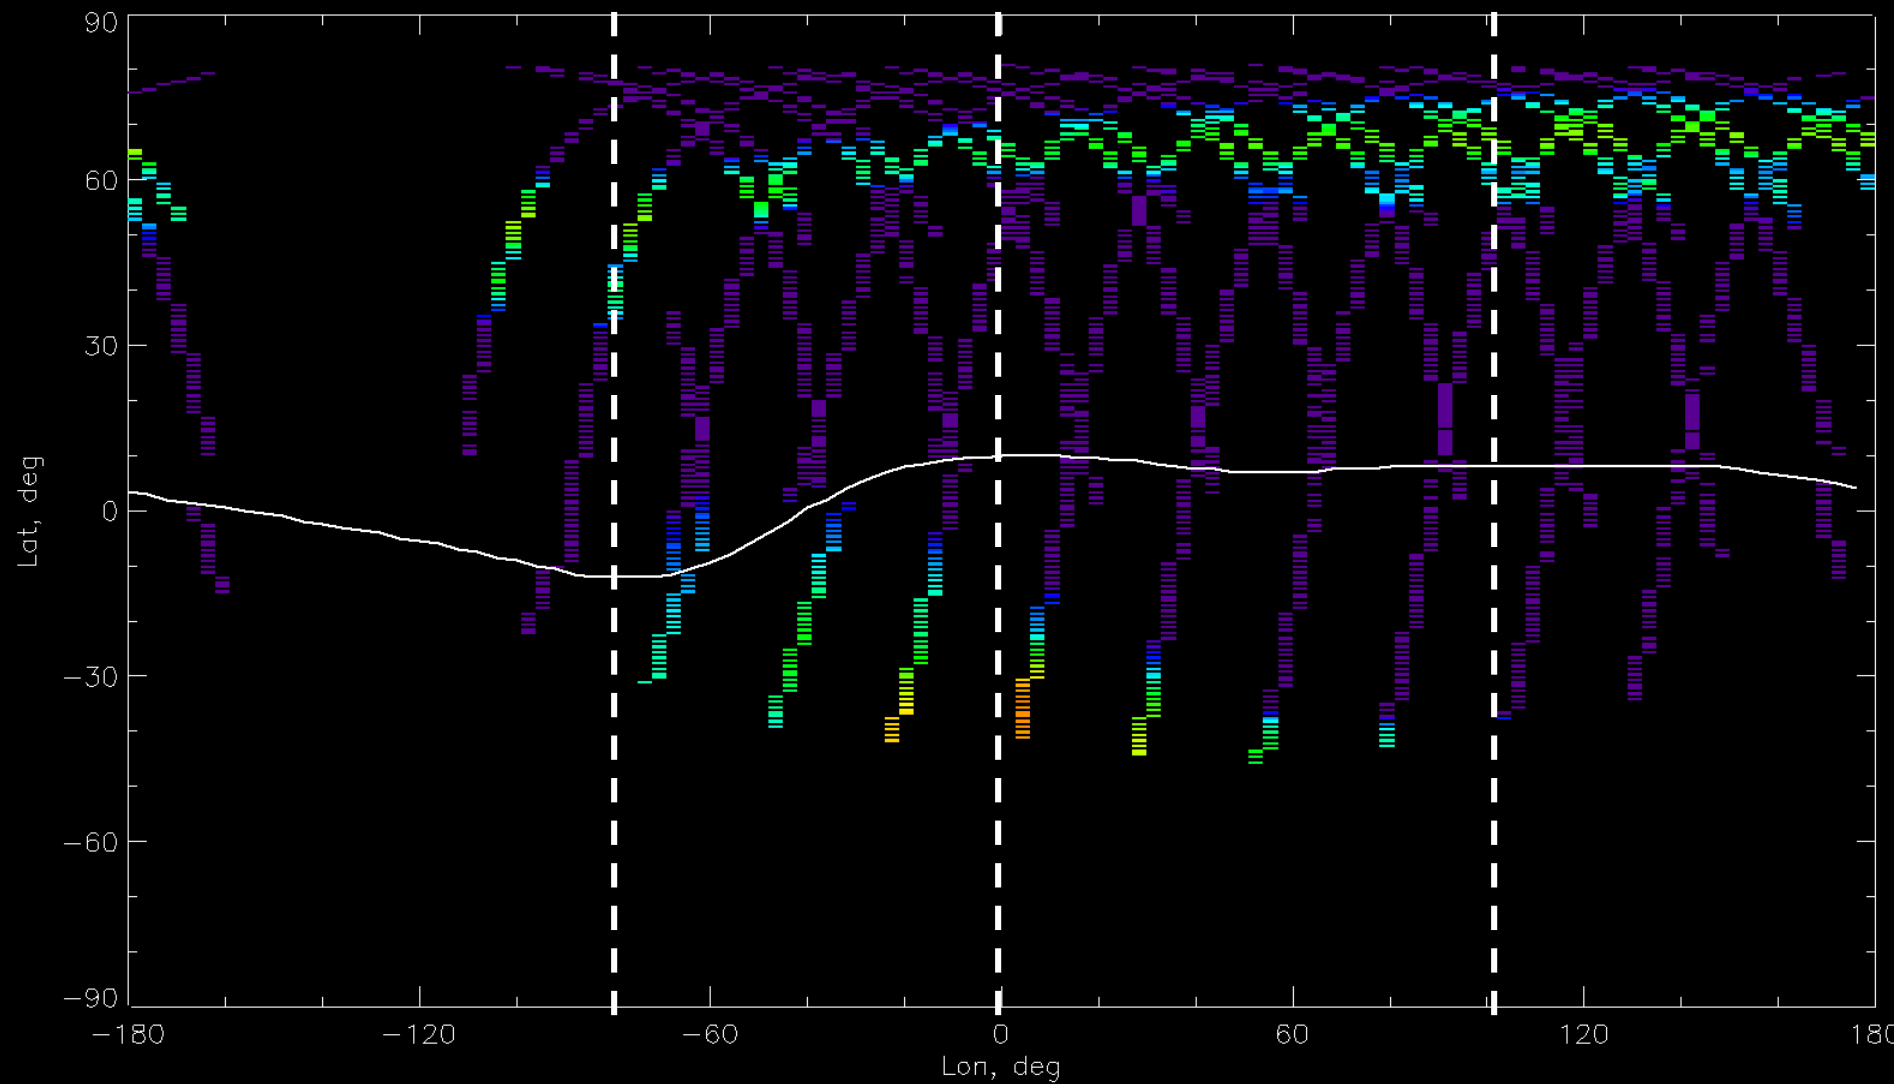

POES e &gt; 100 keV PA=90 avr 2006/06/23 0h - dt=24h

min/max: 1.0E+003/1.0E+006

POES\_mapGsum\_05

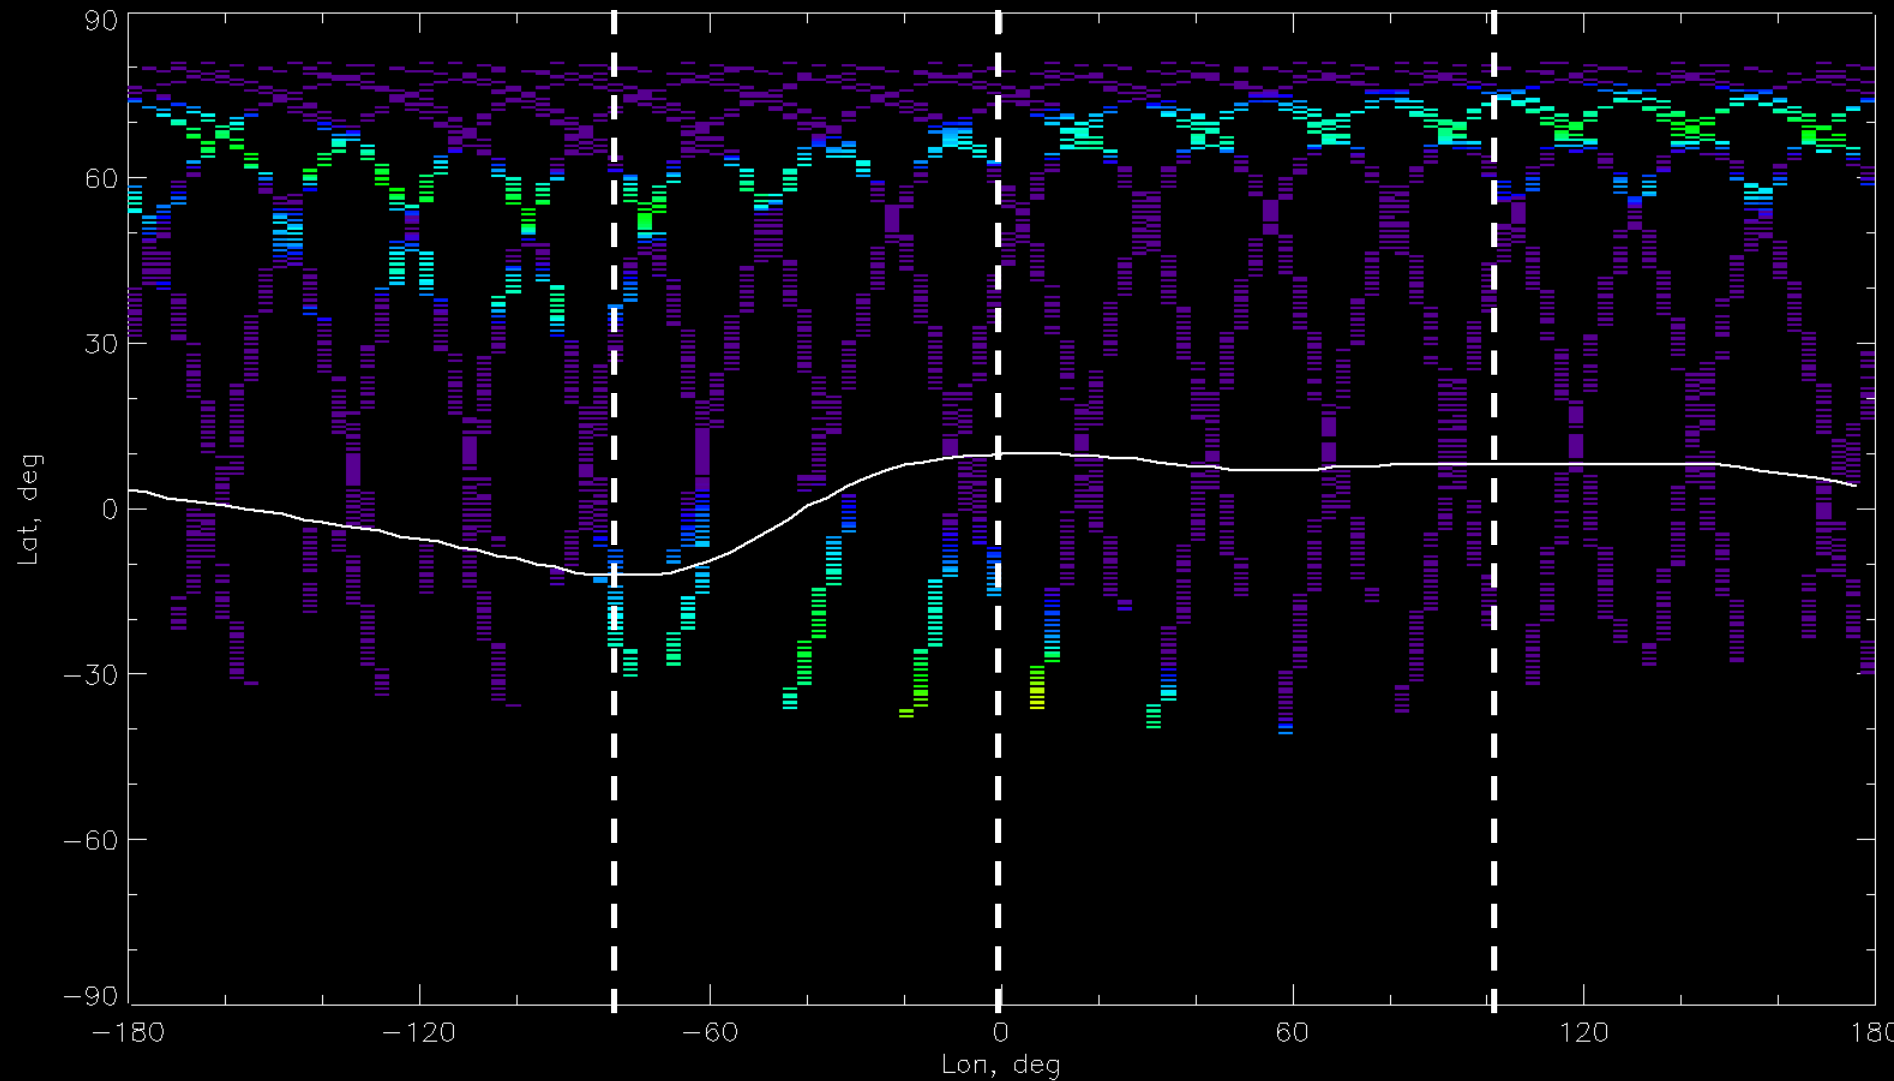

POES e &gt; 100 keV PA=90 avr 2008/06/13 0h - dt=24h

min/max: 1.0E+003/1.0E+006

POES\_mapGsum\_05

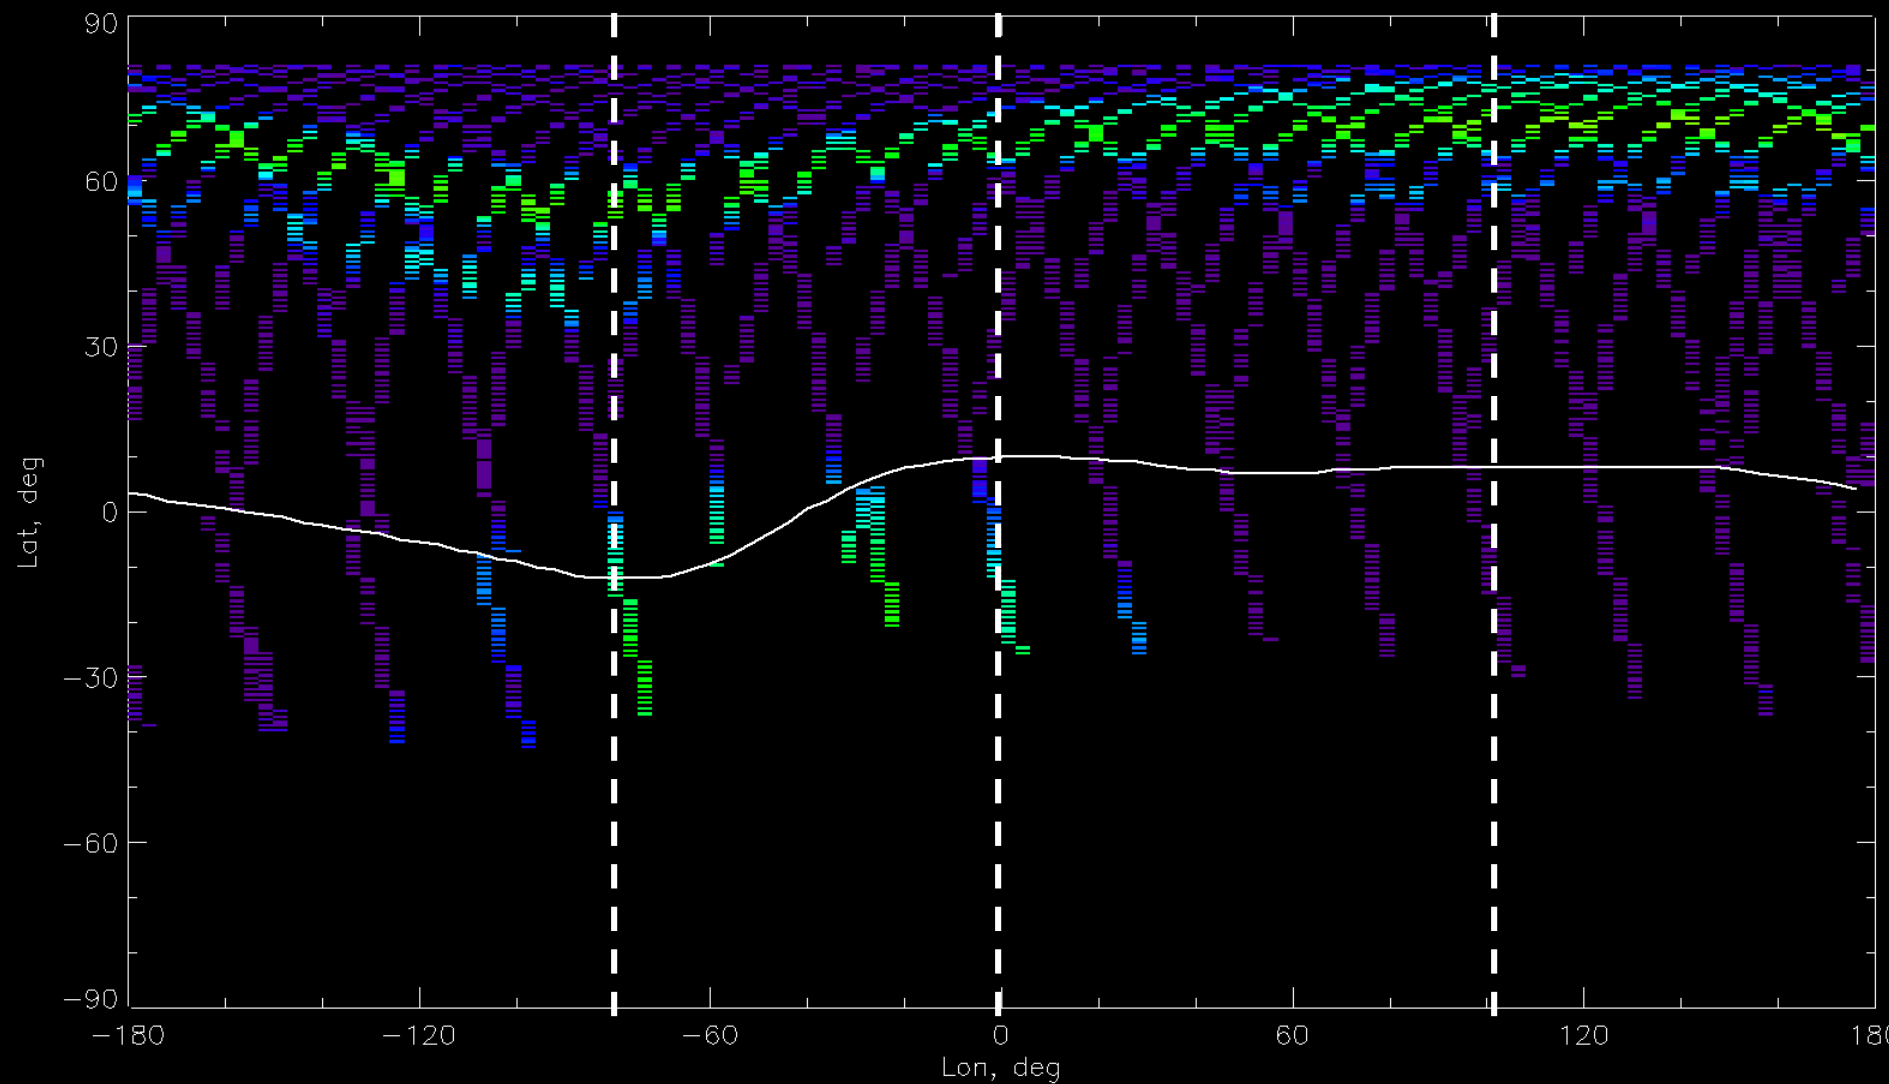



POES e &gt; 100 keV PA=90 avr 2009/06/17 0h - dt=24h

min/max: 1.0E+001/1.0E+004

POES\_mapGsum\_05

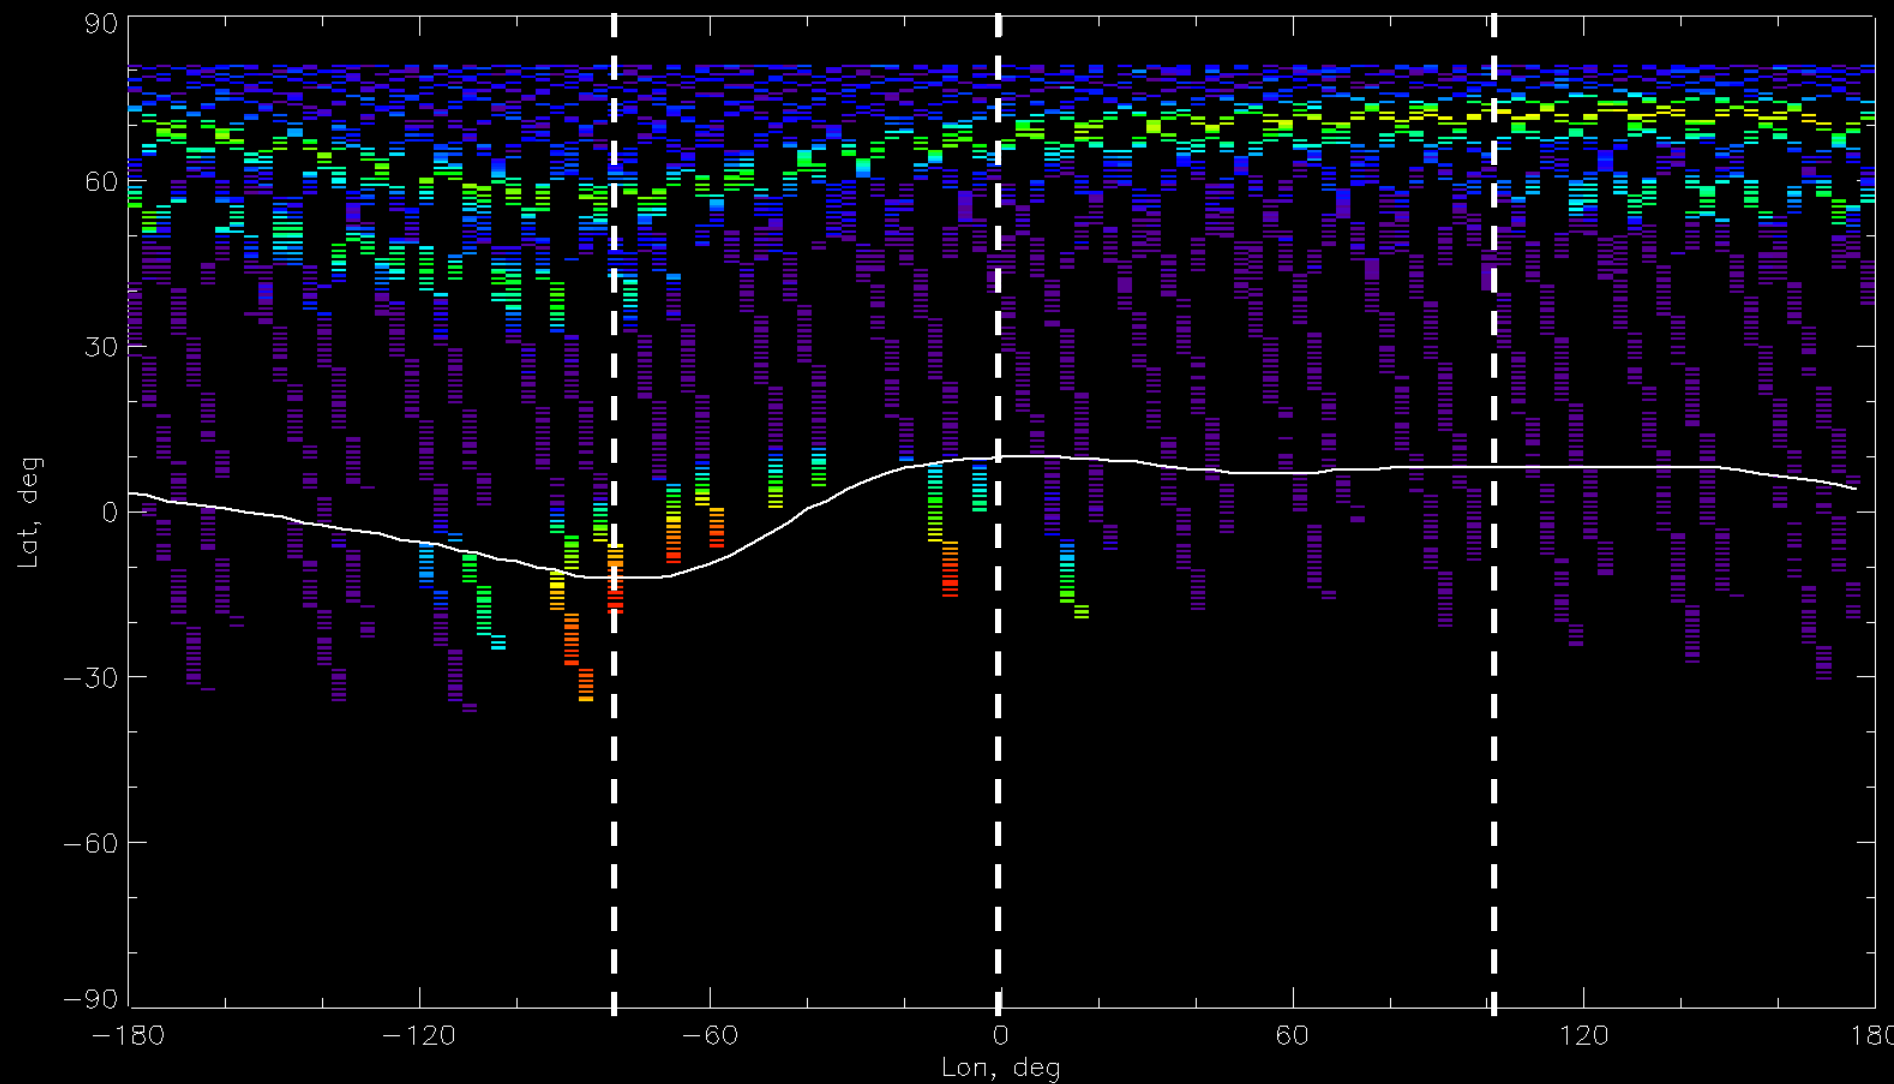

POES e &gt; 100 keV PA=90 avr 2010/06/12 0h - dt=24h

min/max: 1.0E+003/1.0E+006

POES\_mapGsum\_05

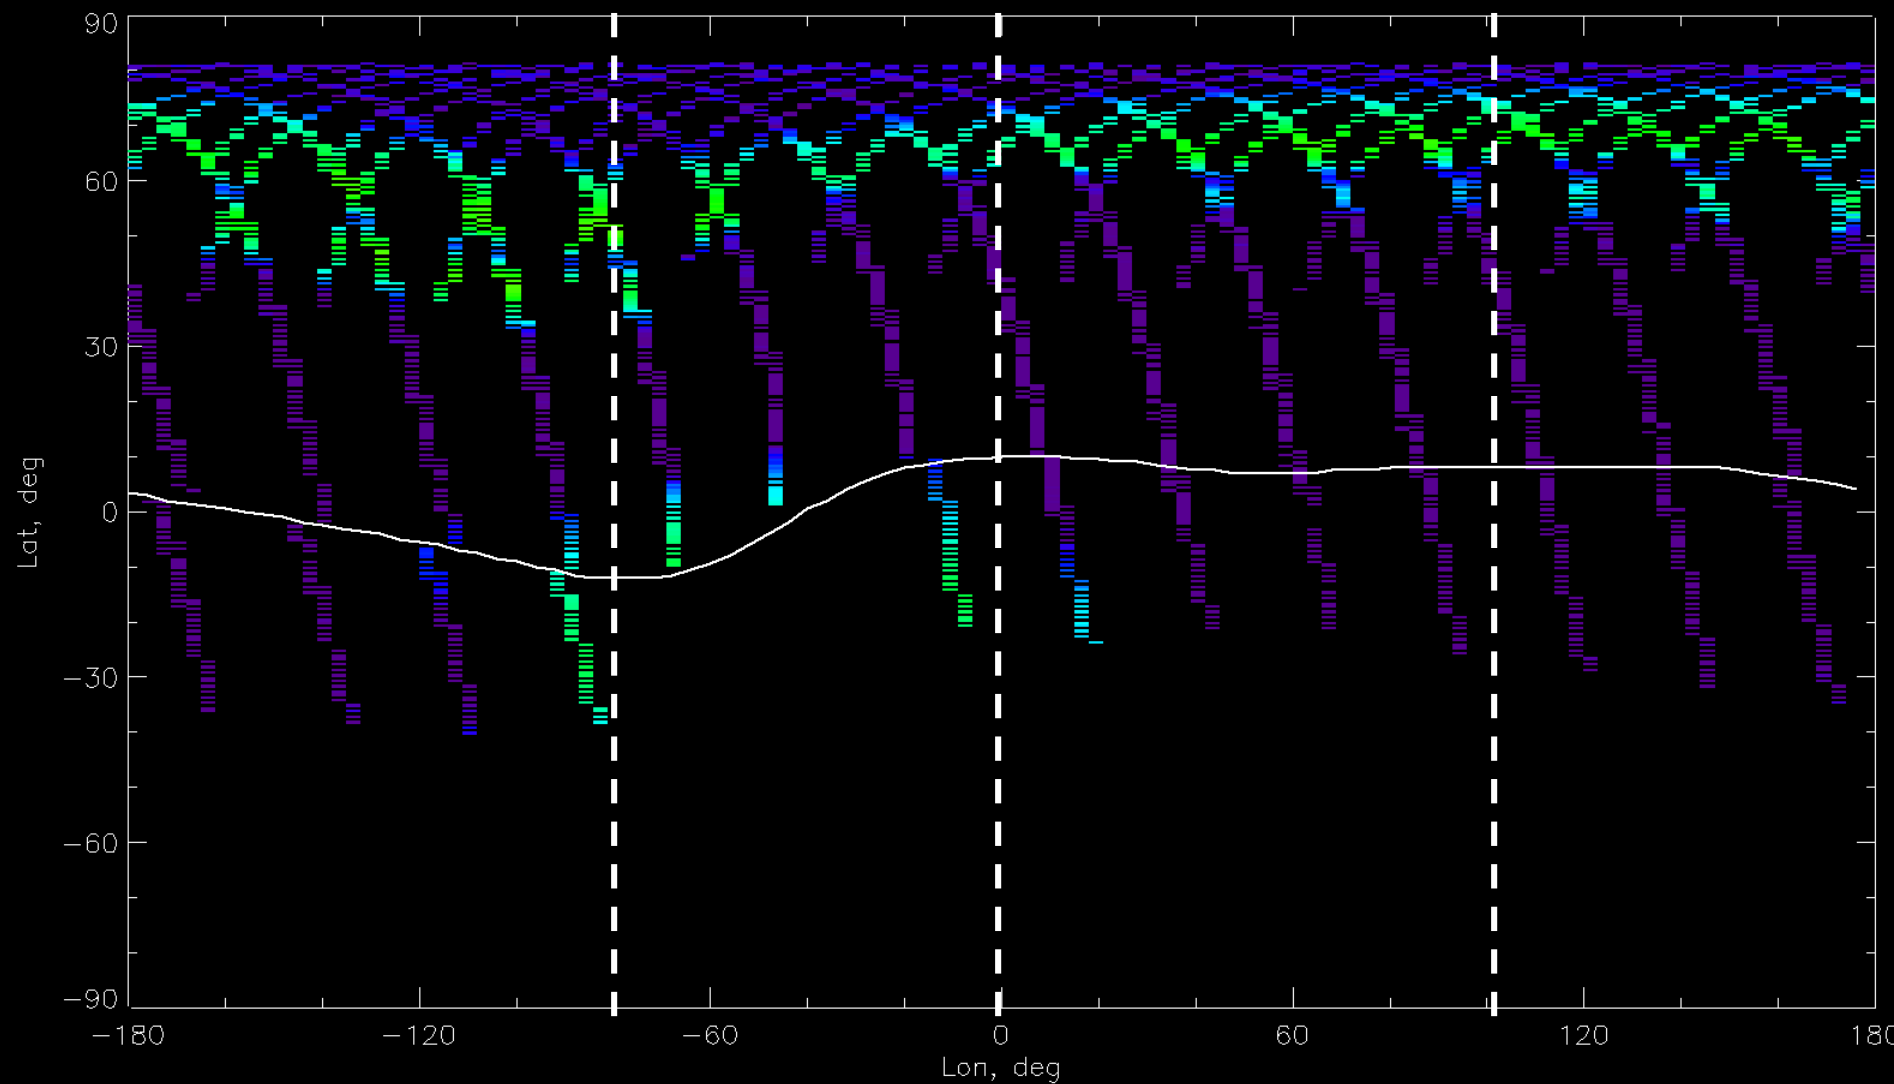

POES e &gt; 100 keV PA=90 avr 2011/06/28 6h - dt=24h

min/max: 1.0E+003/1.0E+006

POES\_mapGsum\_05

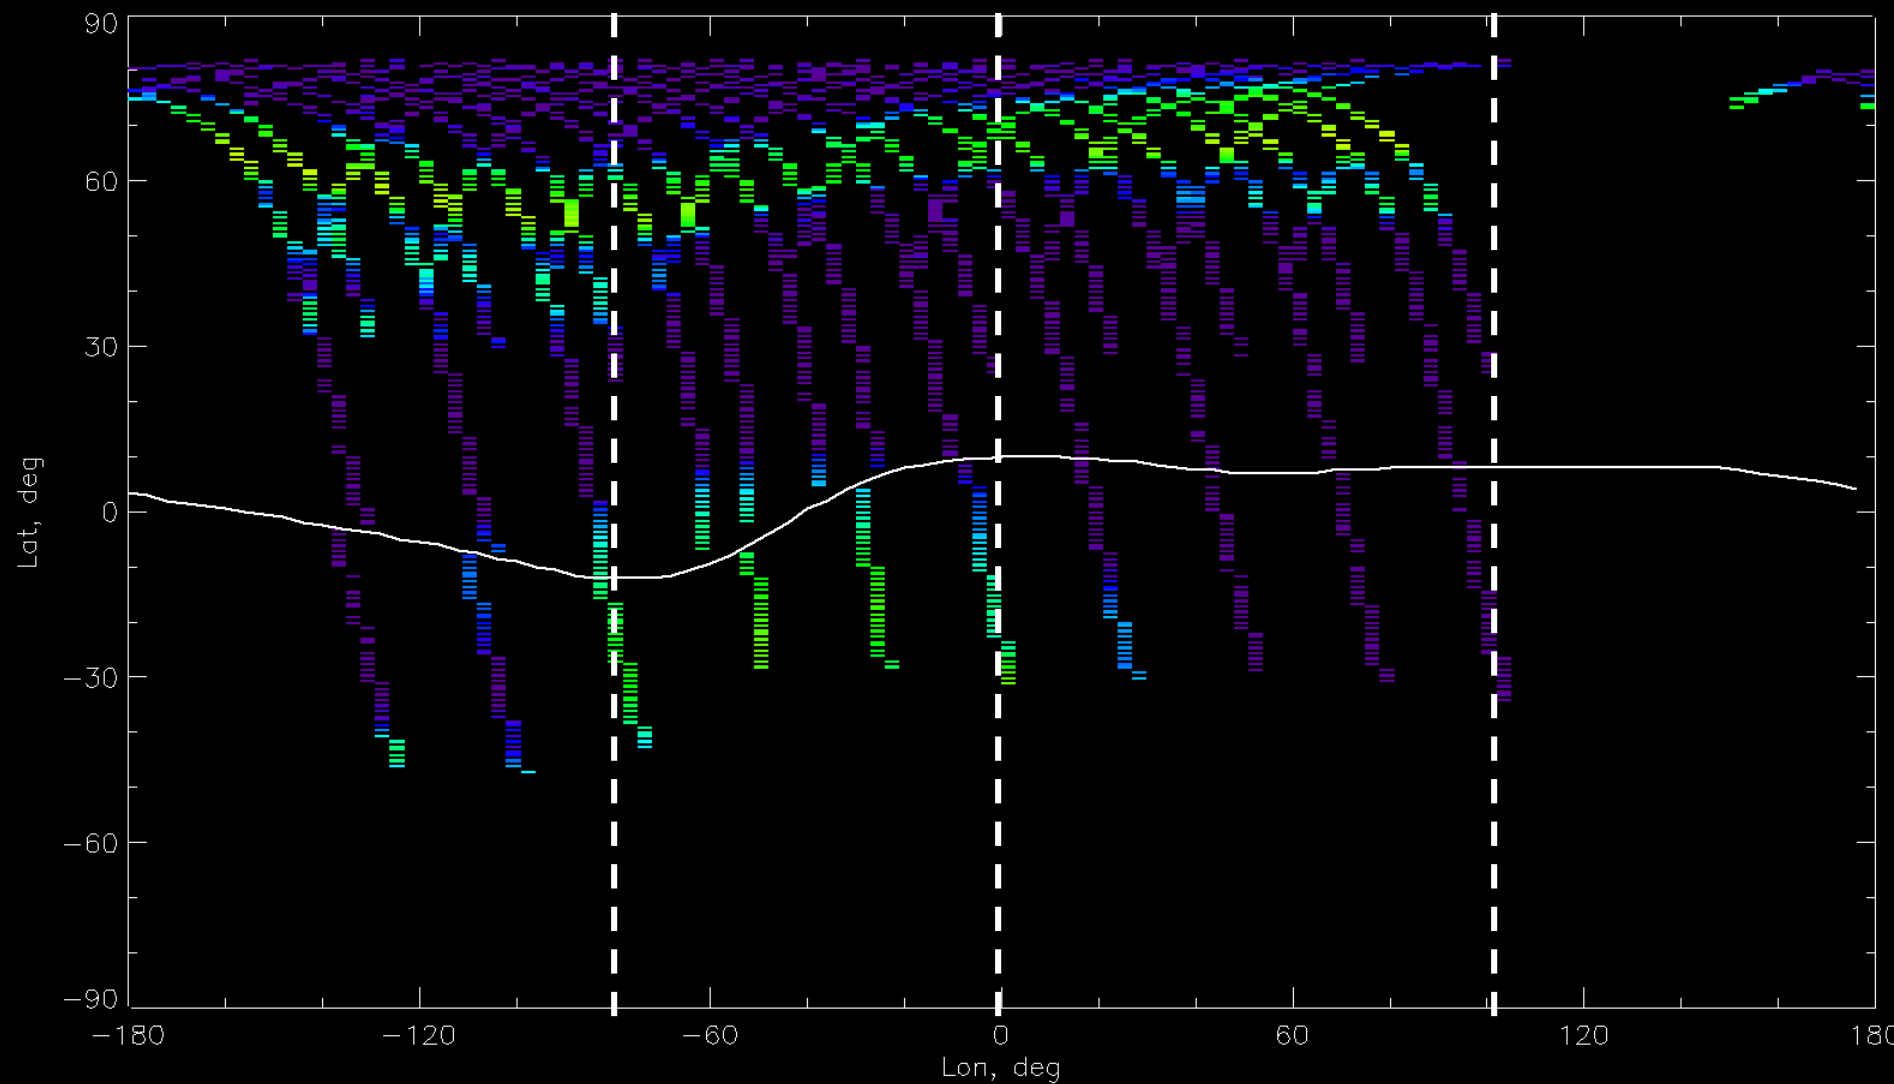

POES e &gt; 100 keV PA=90 avr 2012/06/15 0h - dt=24h

min/max: 1.0E+003/1.0E+006

POES\_mapGsum\_05

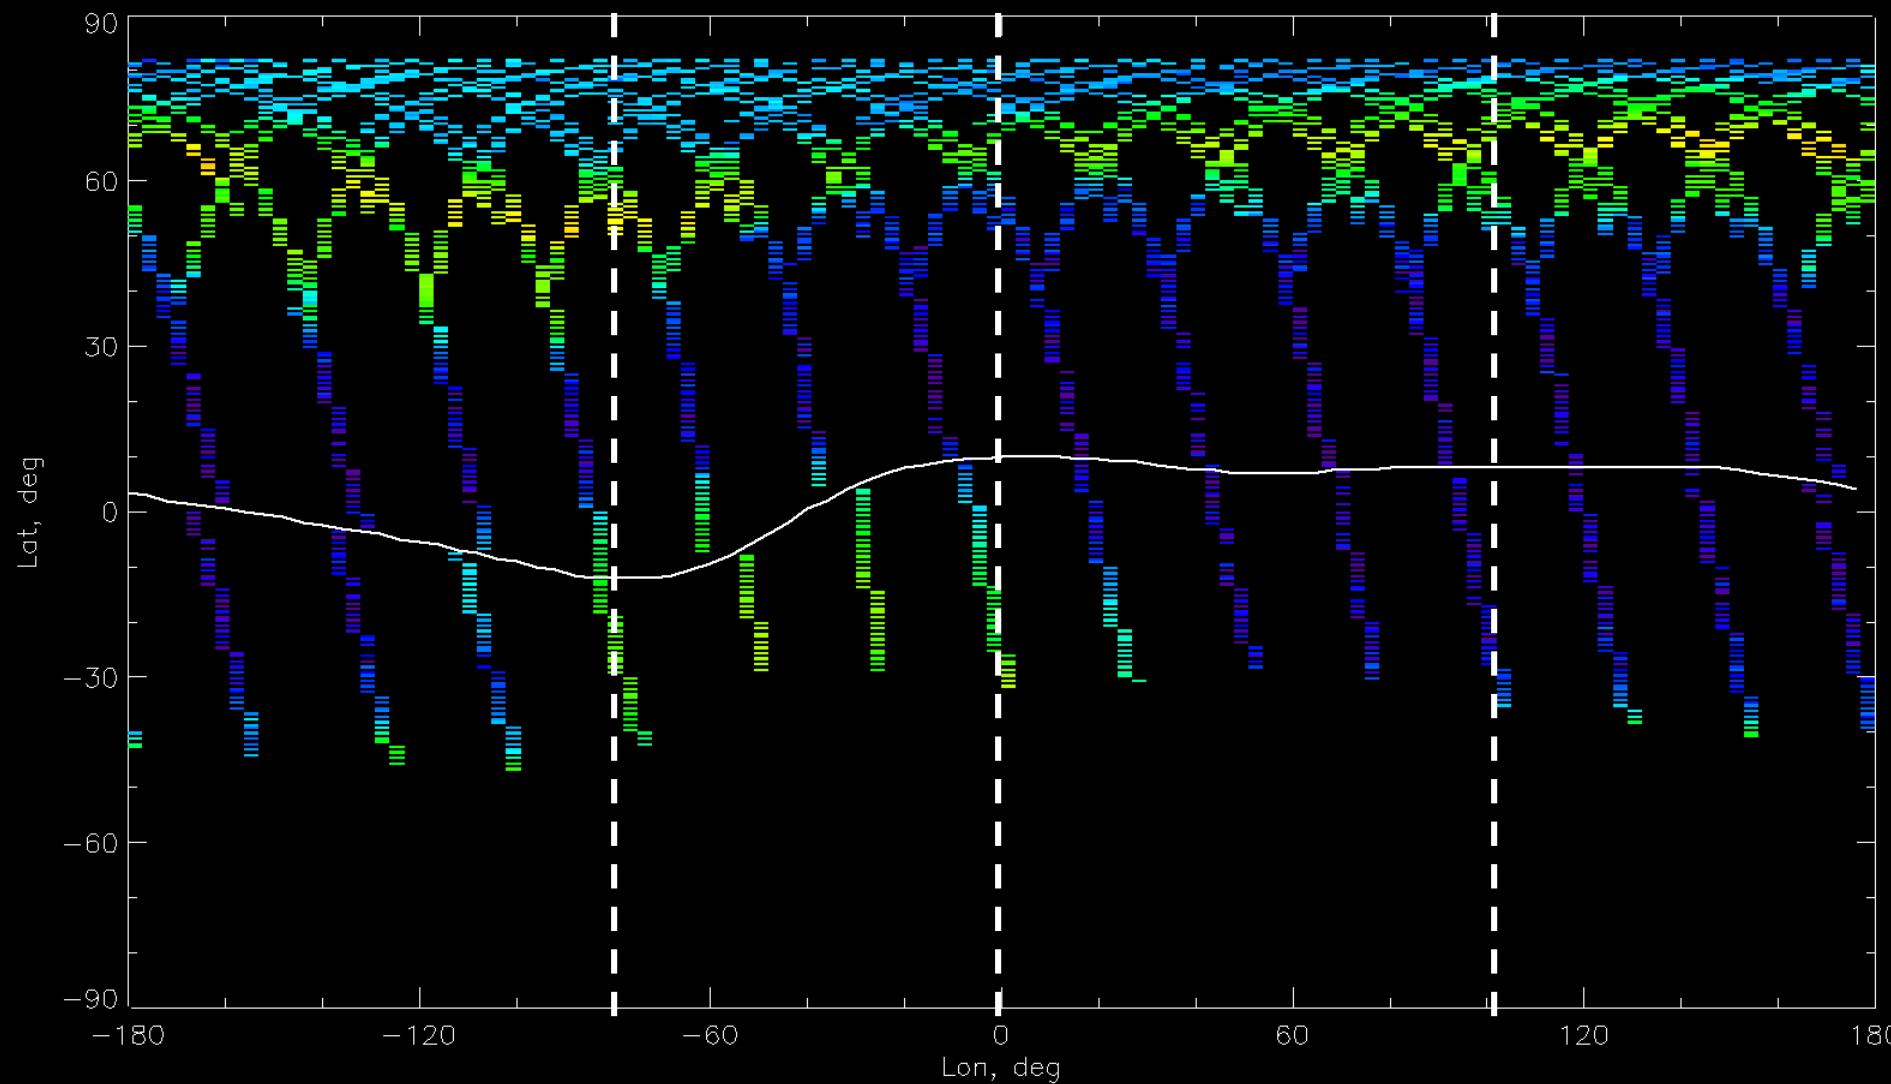

# Set map100

POES e > 100 keV PA=90 avr 2013/06/16 0h - dt=24h

min/max: 1.0E+003/1.0E+006

POES\_mapGsum\_05

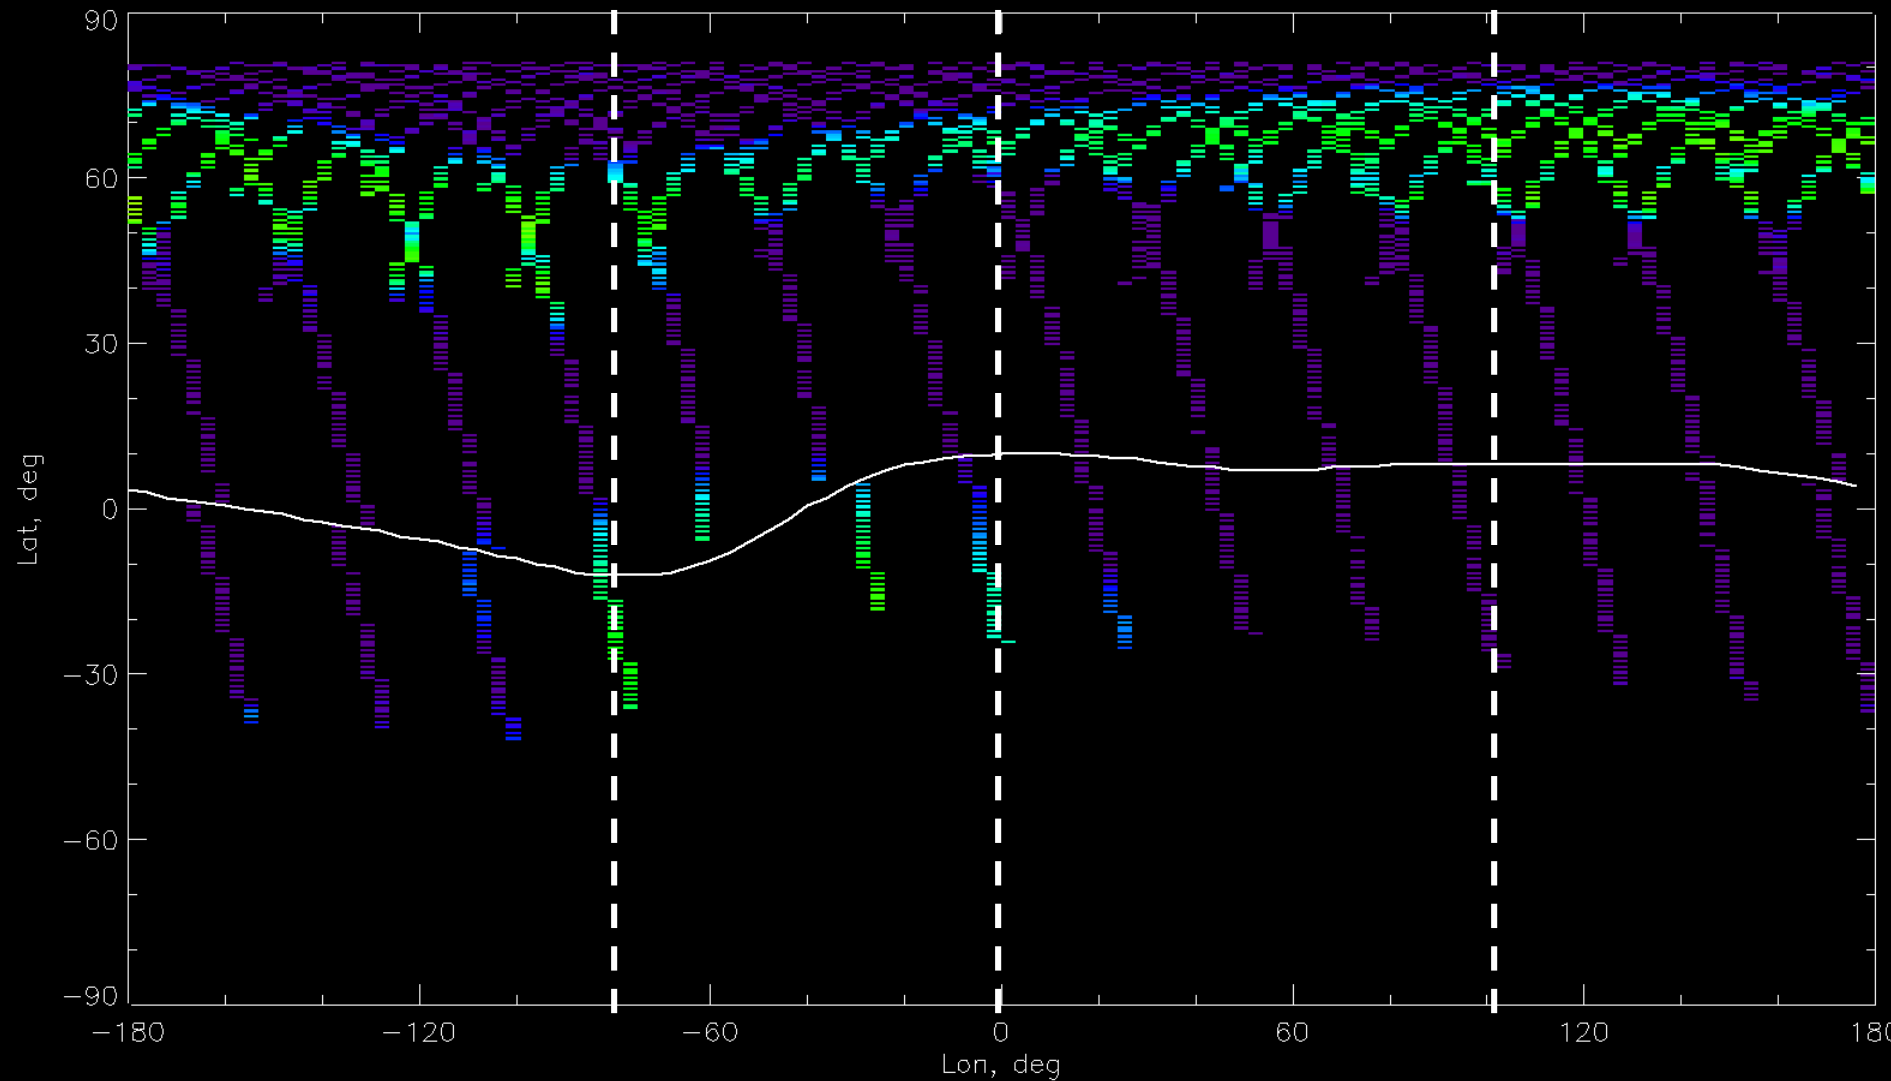

POES e > 130 keV PA=90 avr 2014/06/01 0h - dt=36h

min/max: 1.0E+001/1.0E+006

POES\_mapGsum\_05

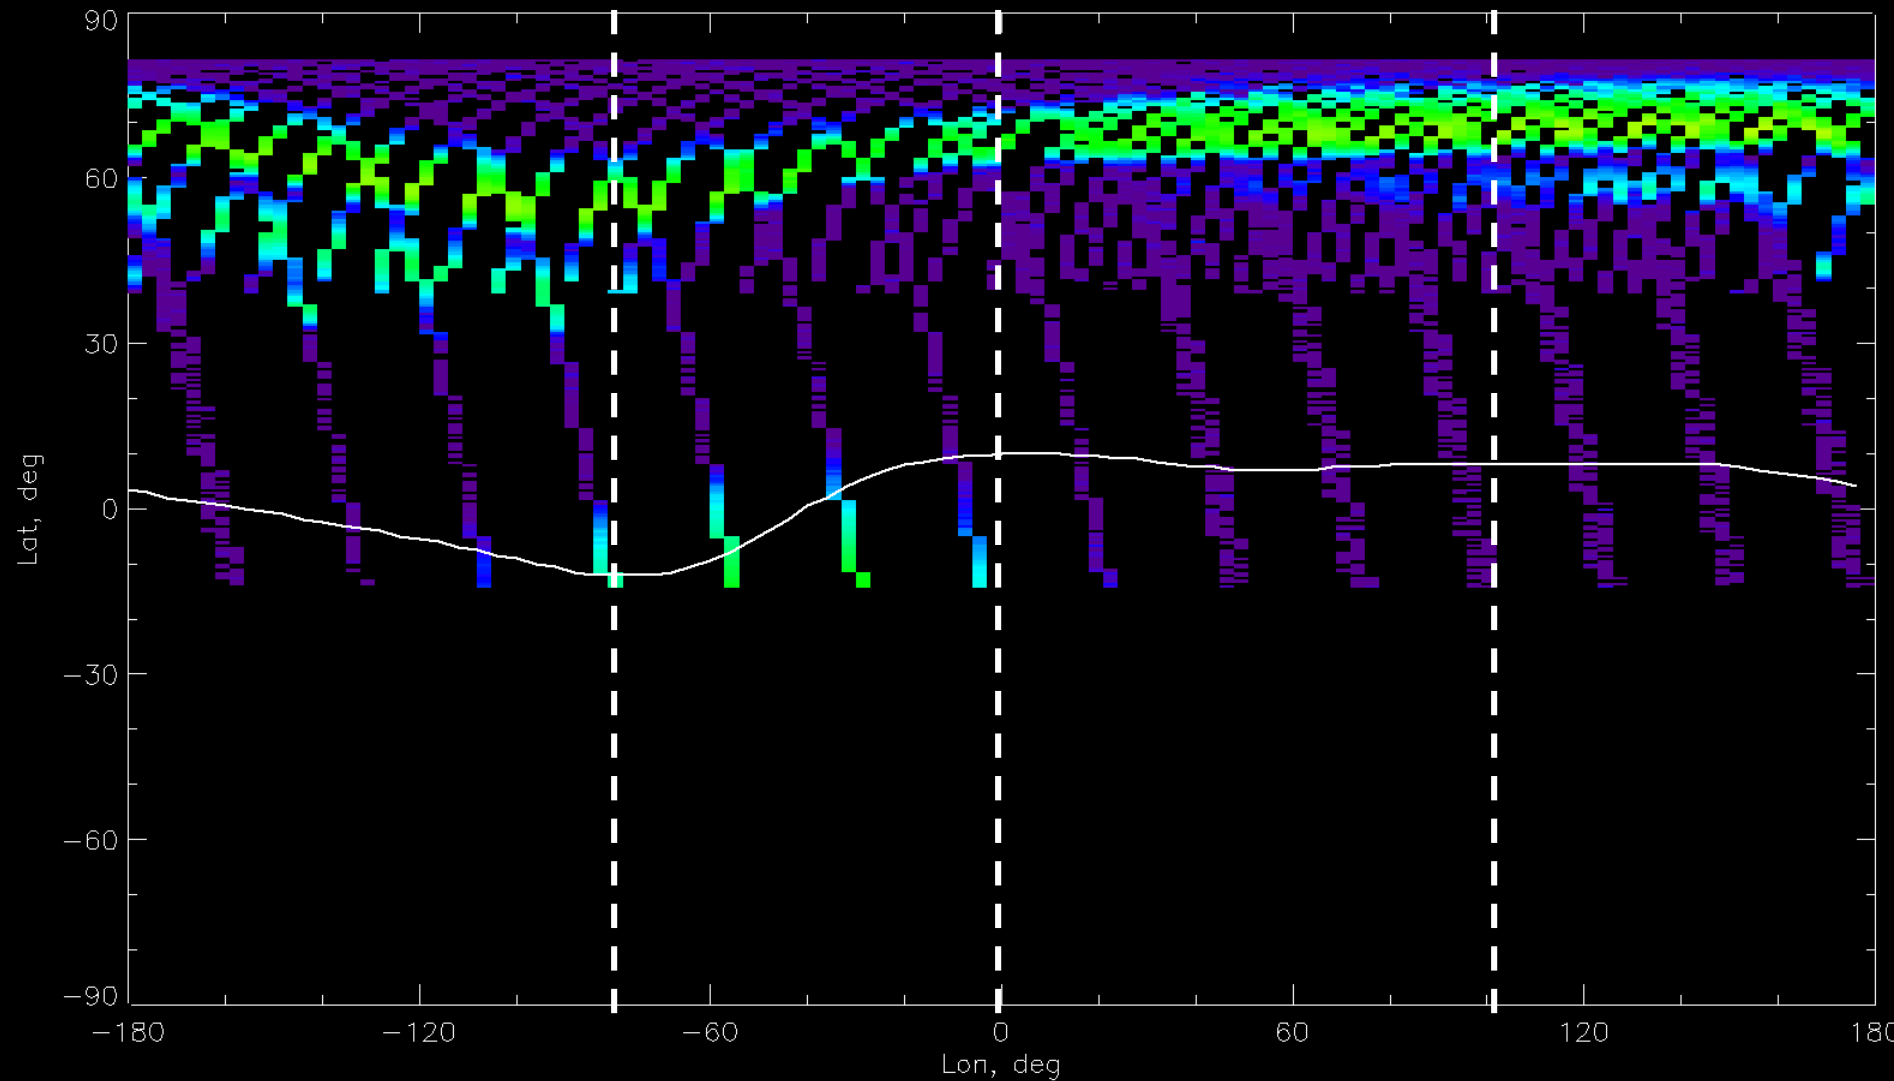

# Set map100

POES e > 130 keV PA=90 avr 2015/06/04 0h - dt=24h

min/max: 1.0E+001/1.0E+006

POES\_mapGsum\_05

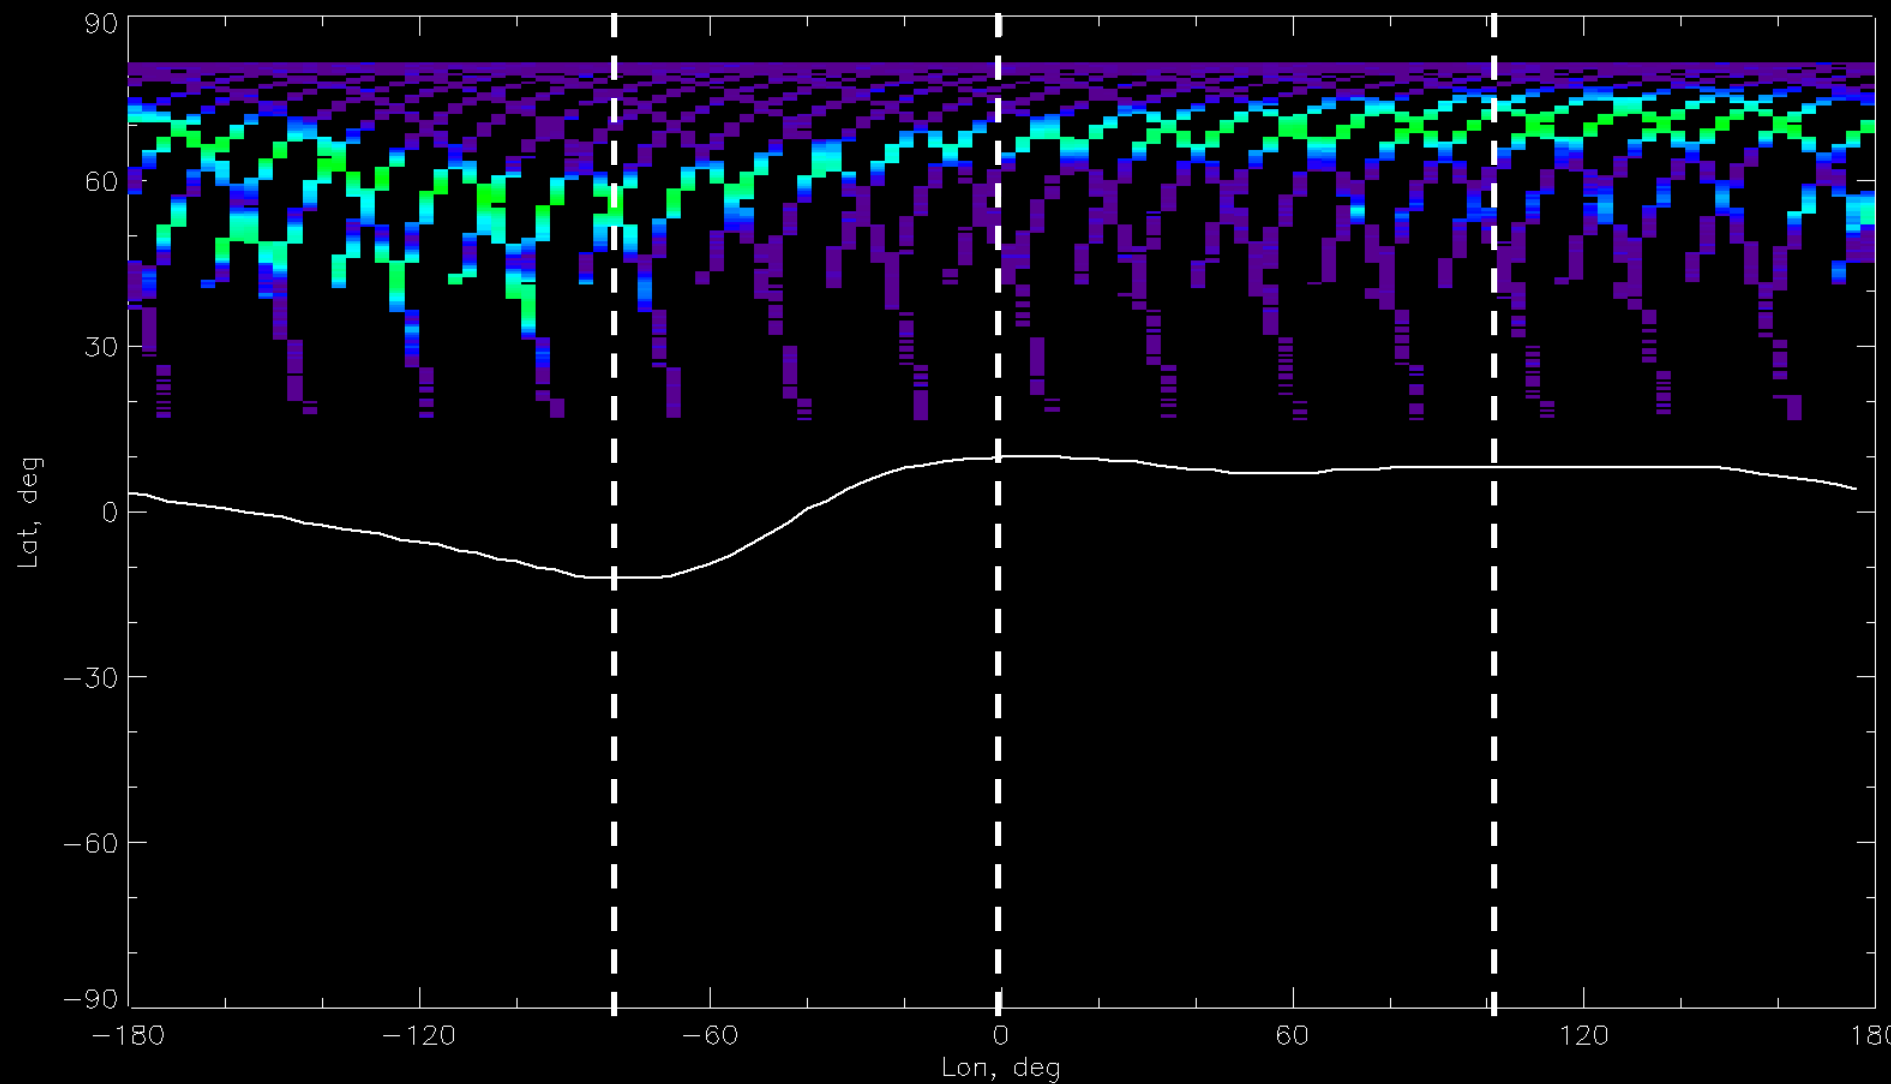

POES e &gt; 100 keV PA=90 avr 2016/06/03 0h - dt=24h

min/max: 1.0E+003/1.0E+006

POES\_mapGsum\_05

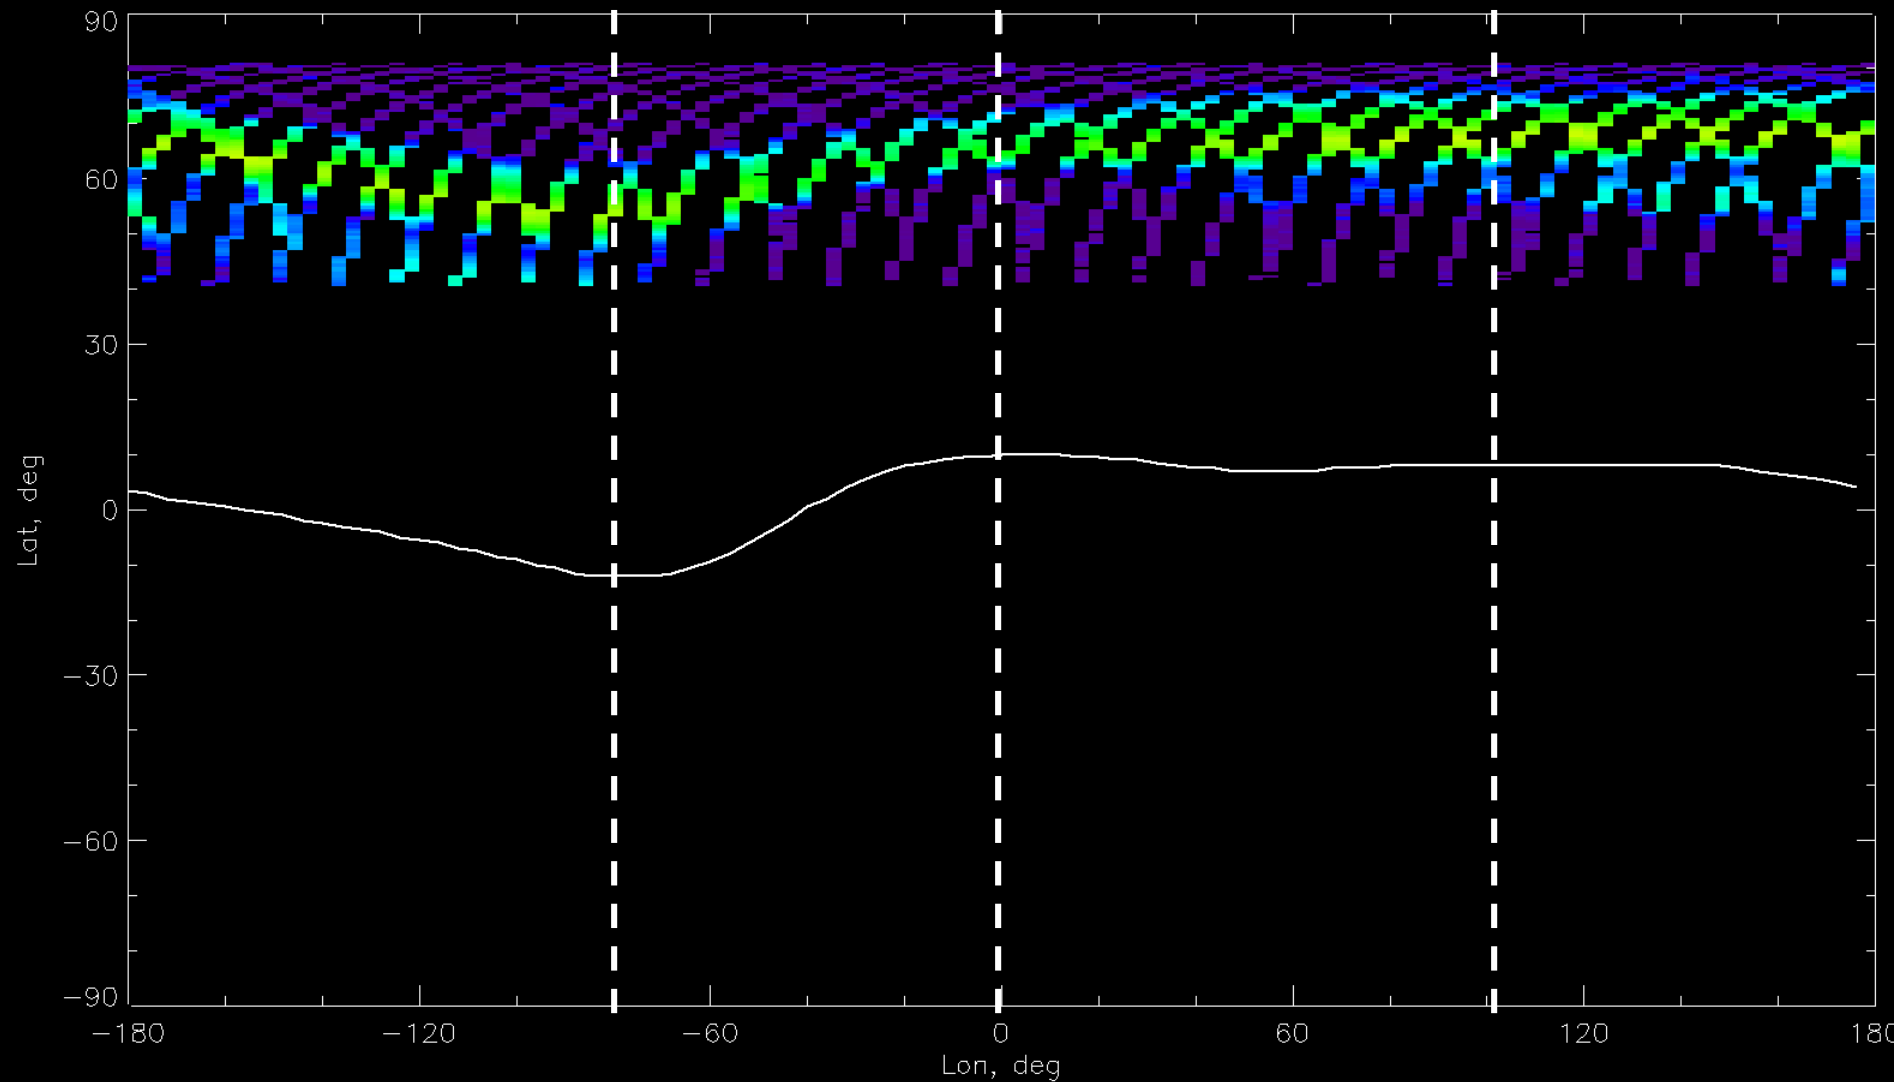



# Set map100

POES e > 130 keV PA=90 avr 2017/06/09 6h - dt=24h

min/max: 1.0E+002/1.0E+005

POES\_mapGsum\_05

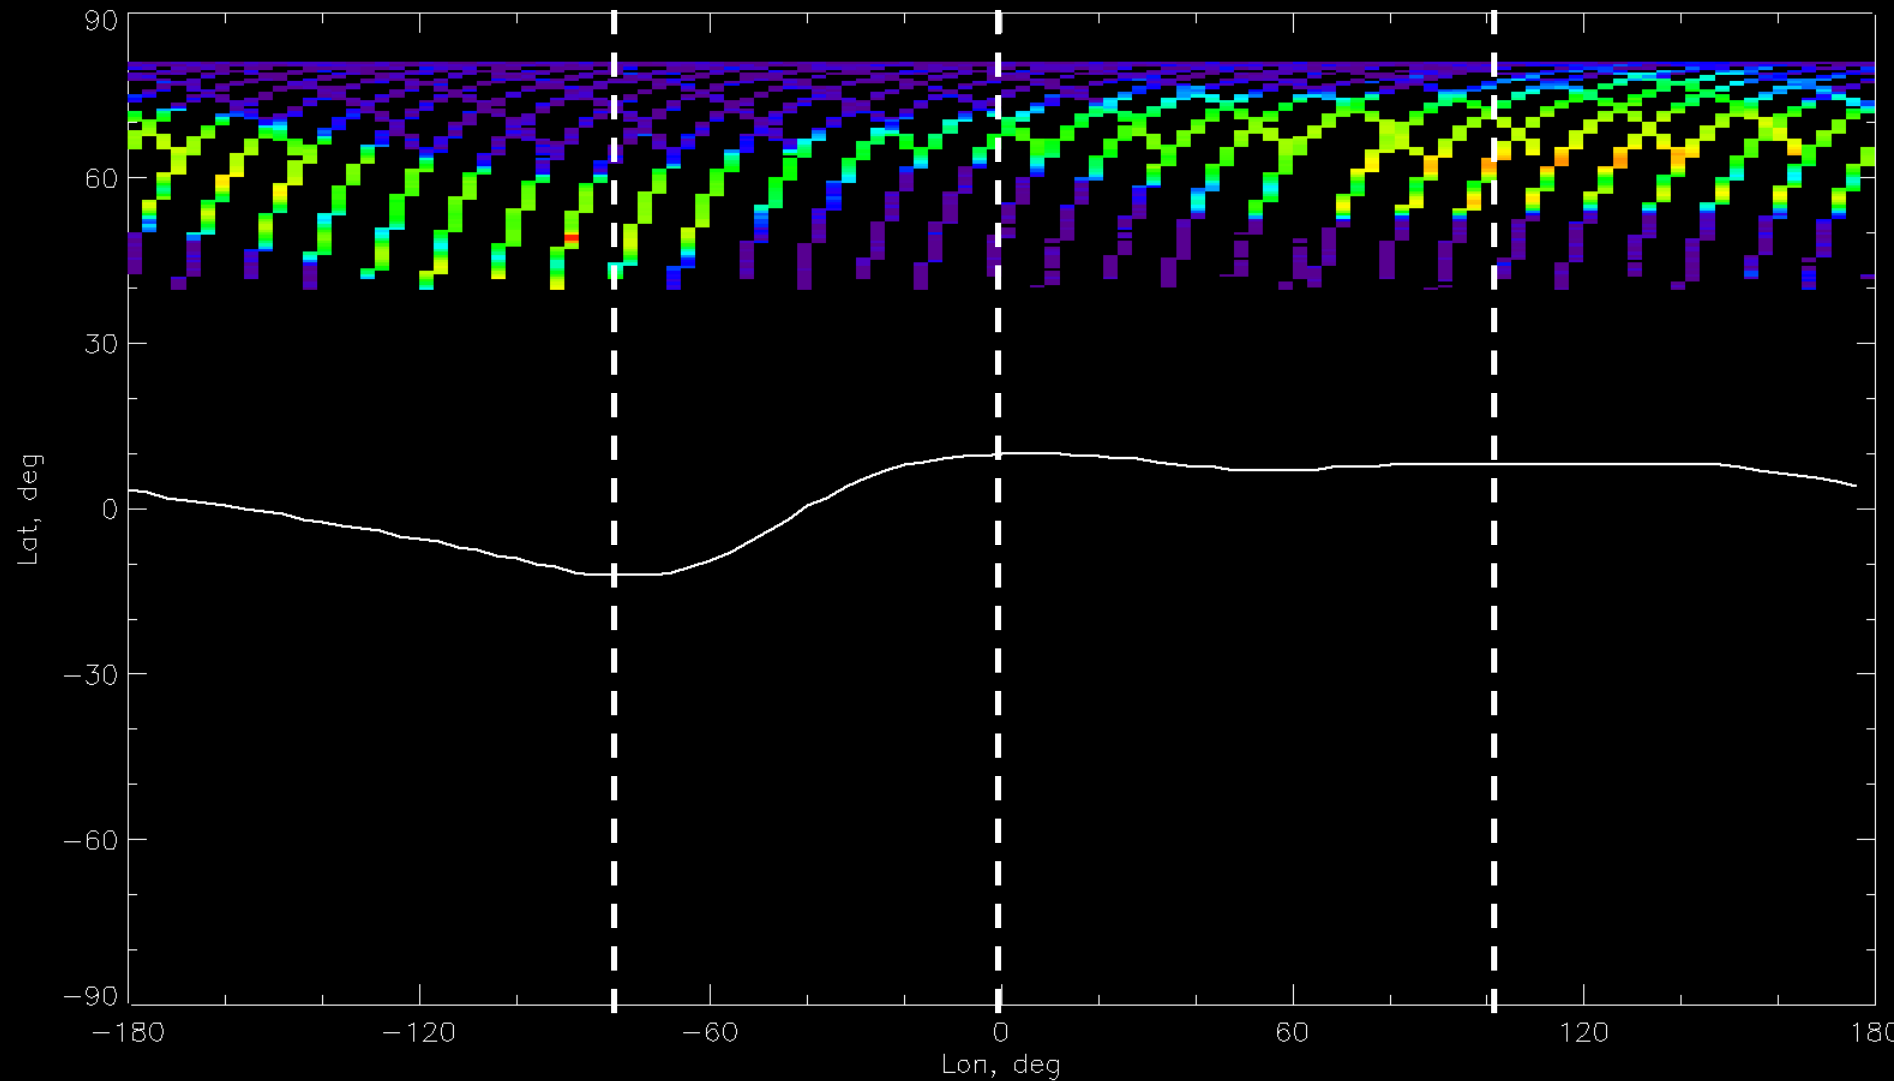

POES e > 100 keV PA=90 avr 2018/06/12 08h - dt=24h

min/max: 1.0E+003/1.0E+006

POES\_mapGsum\_05

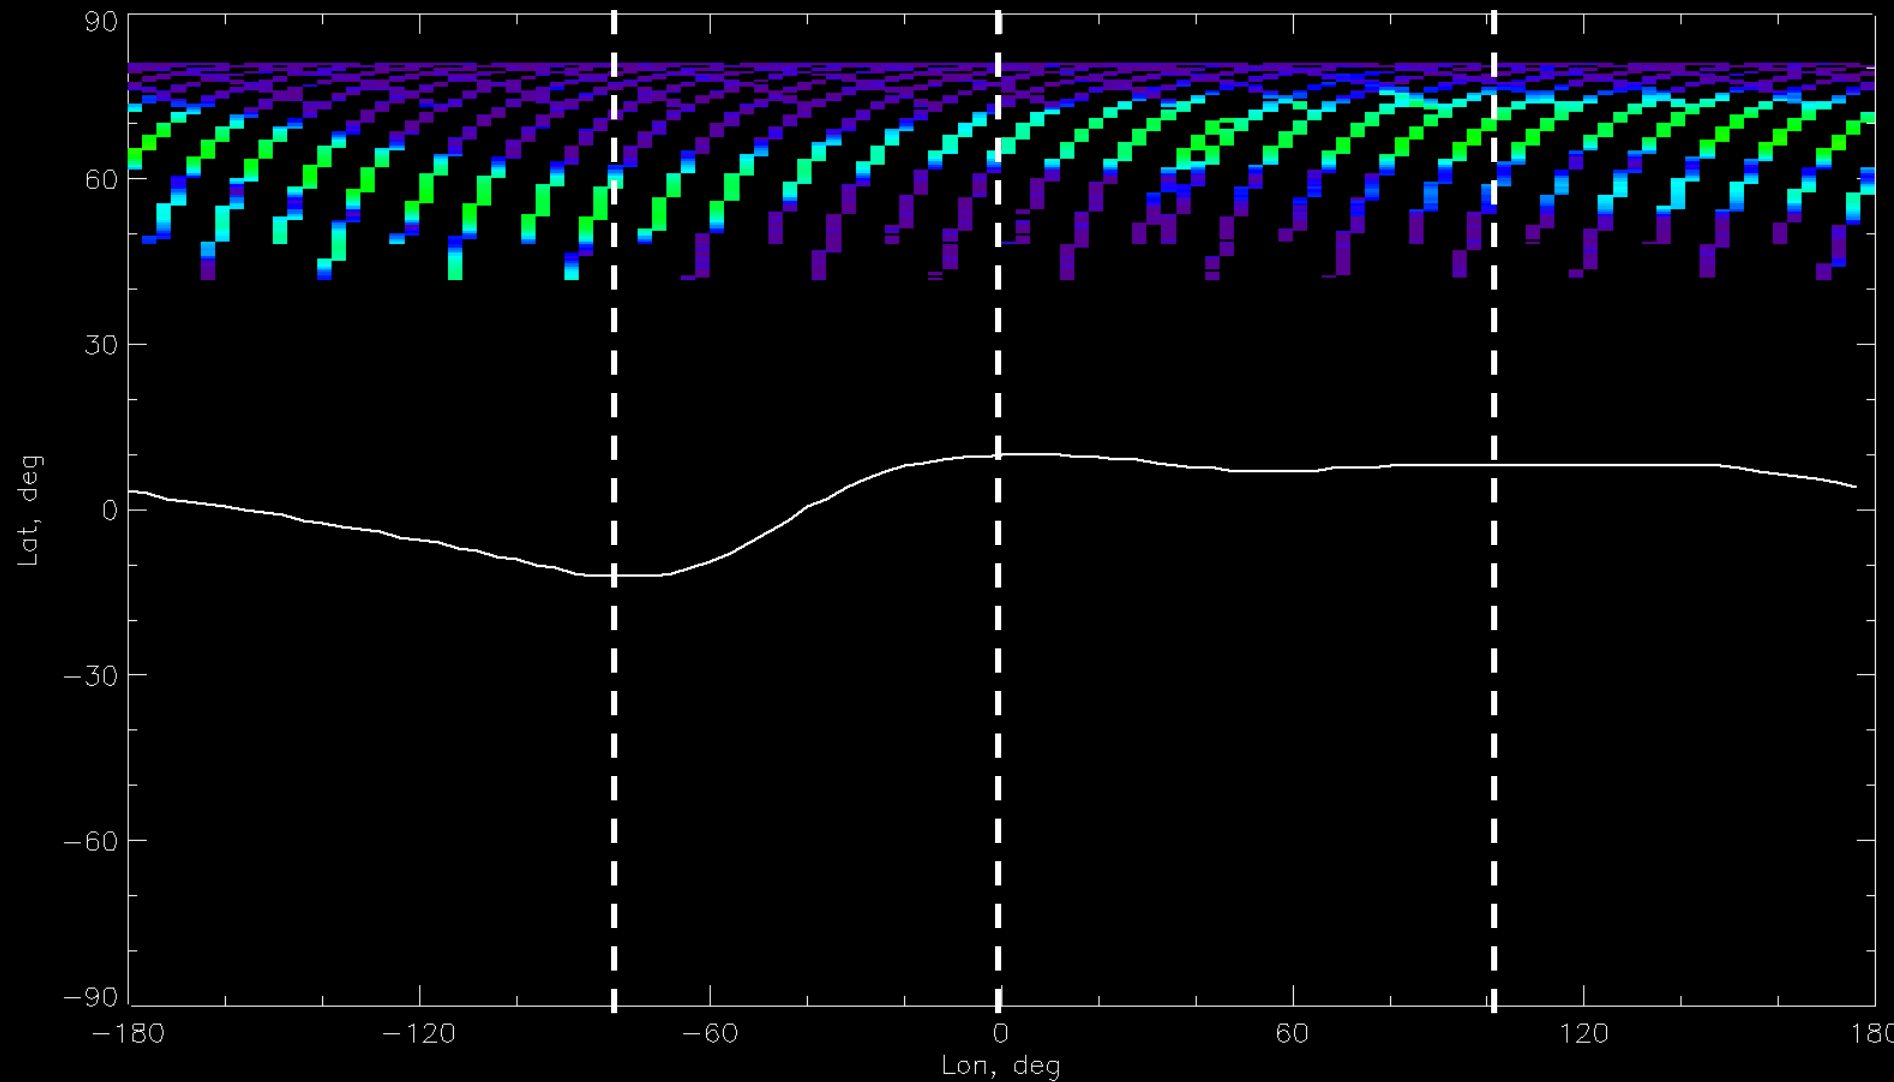

POES  $e > 300$  keV PA=90 avr 2001/08/29 0h - dt=24hmin/max:  $1.0E-001/1.0E+004$ 

POES\_mapGsum\_05

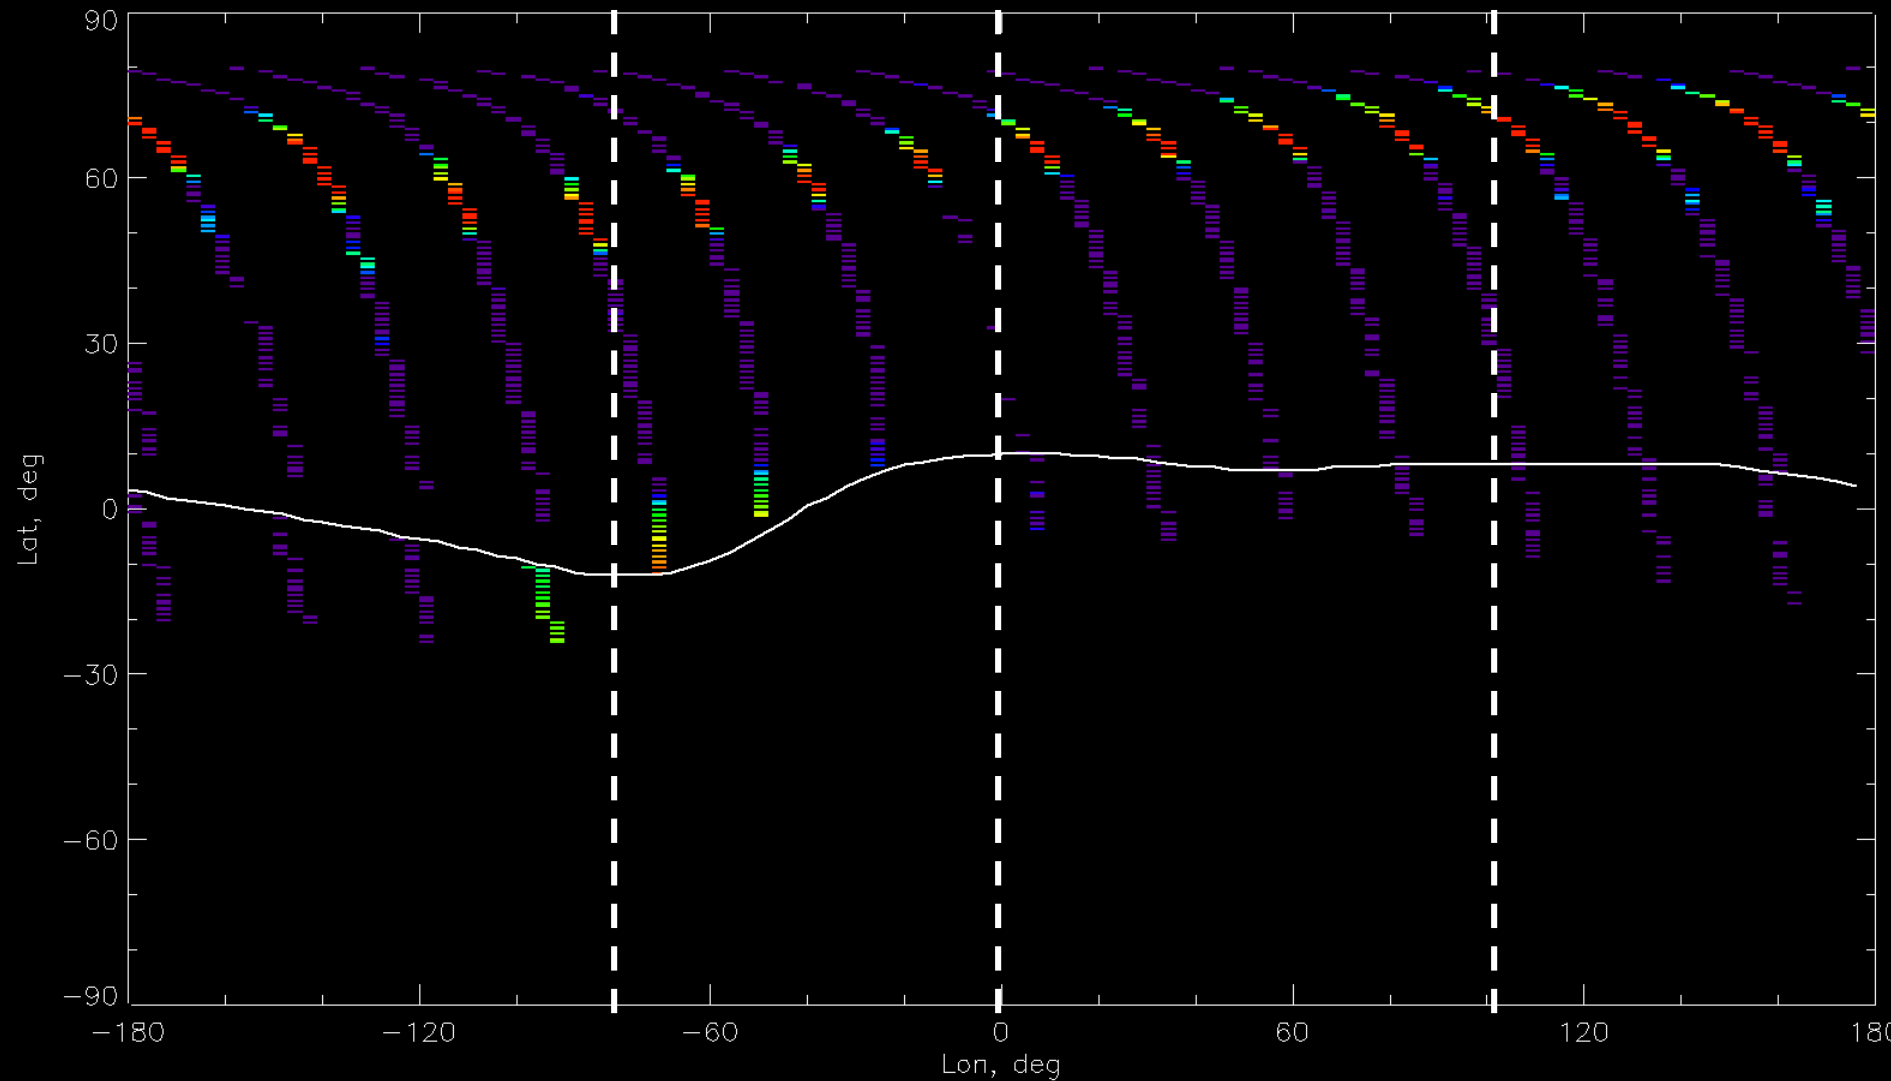

POES  $e > 300$  keV PA=90 avr 2002/08/28 0h - dt=24hmin/max:  $1.0E-001/1.0E+004$ 

POES\_mapGsum\_05

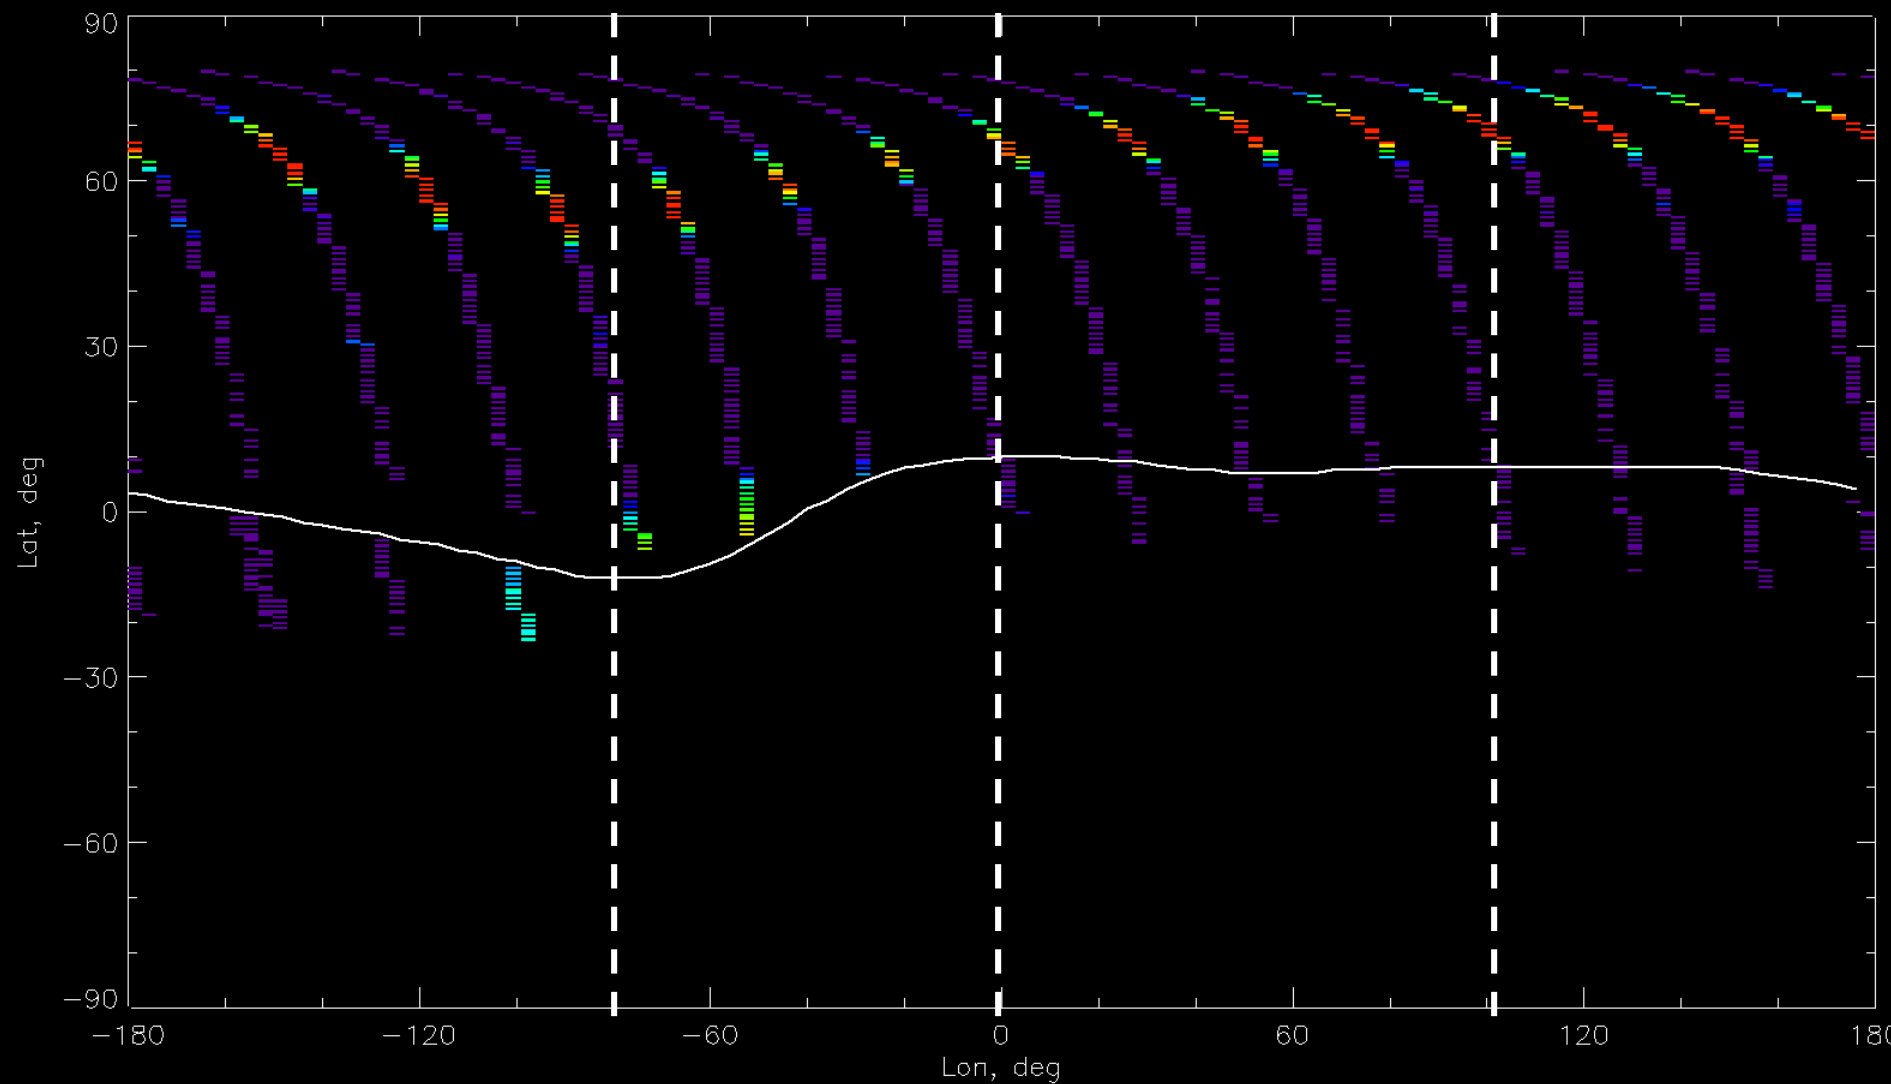

POES  $e > 300$  keV PA=90 avr 2004/08/24 12h - dt=24hmin/max:  $1.0E-001/1.0E+004$ 

POES\_mapGsum\_05

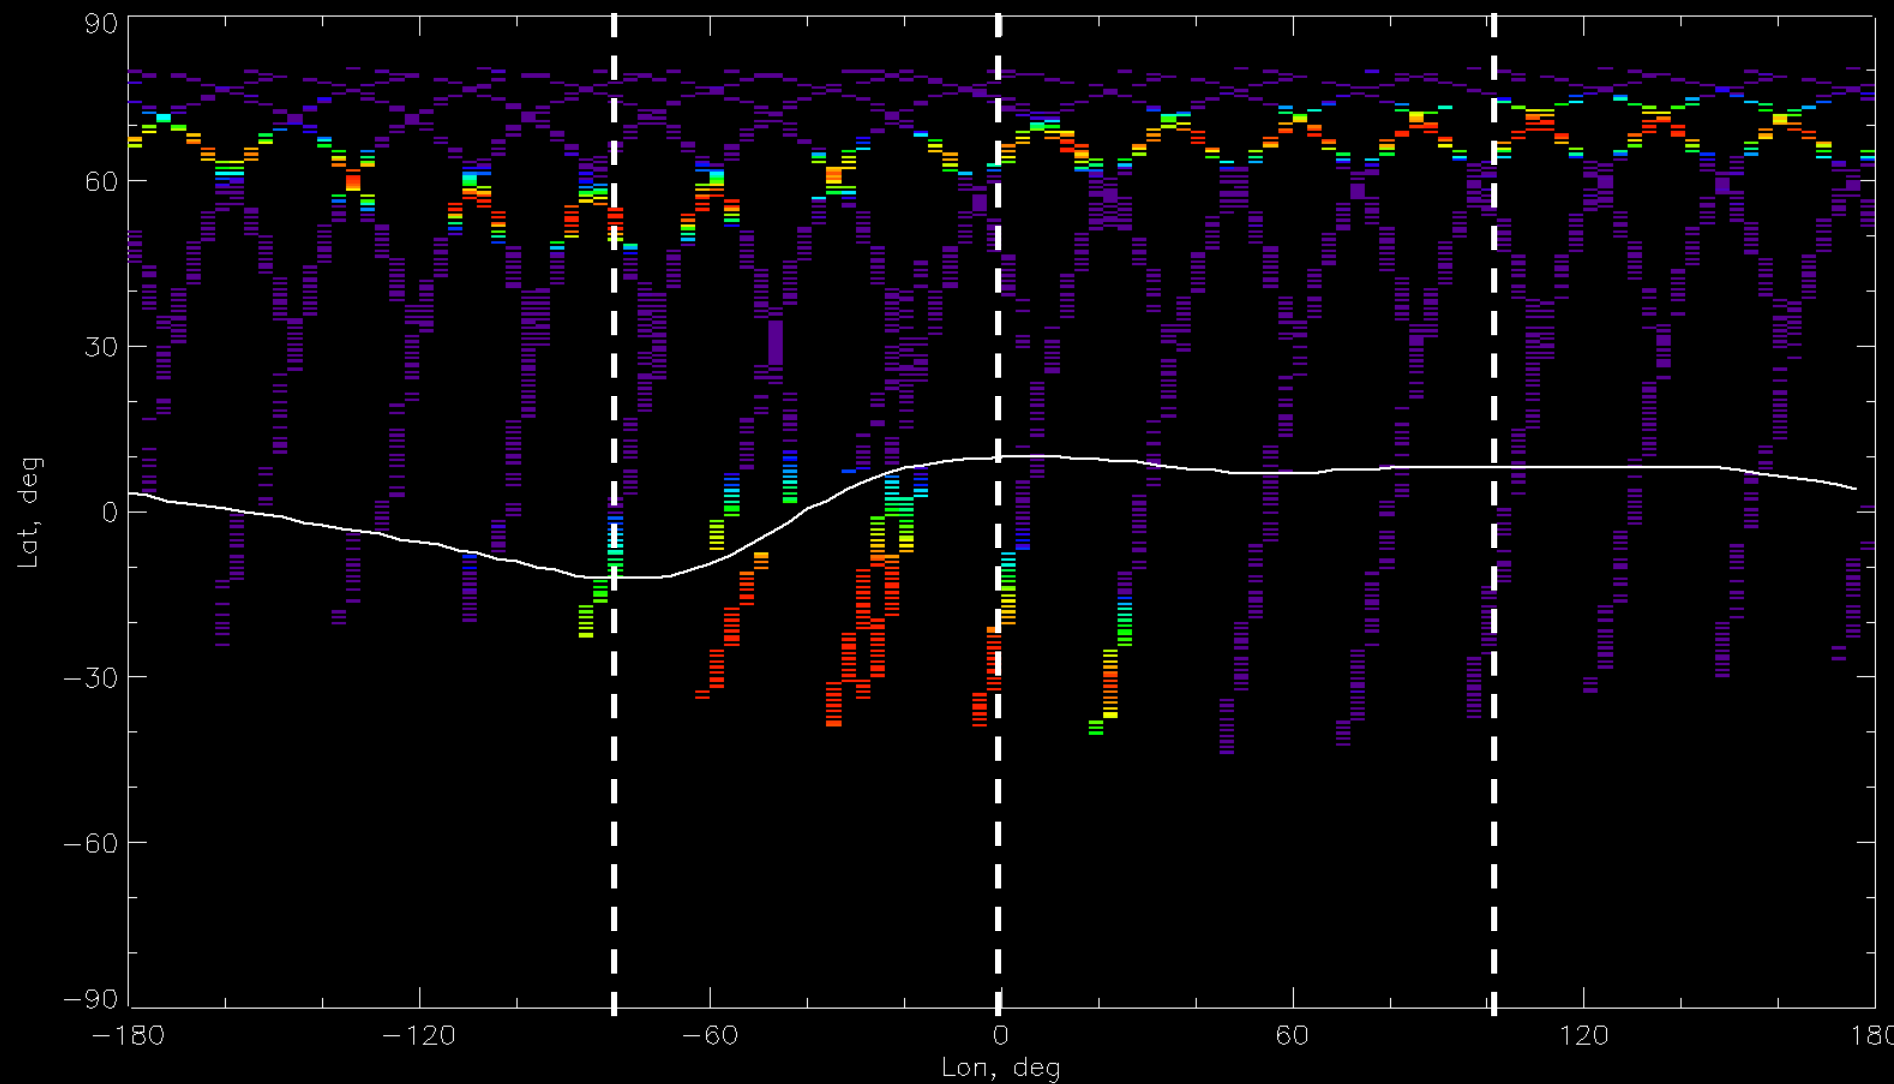

# Set map300

POES  $e > 300$  keV PA=90 avr 2005/08/21 0h - dt=18h

min/max:  $1.0E-001/1.0E+004$

POES\_mapGsum\_05

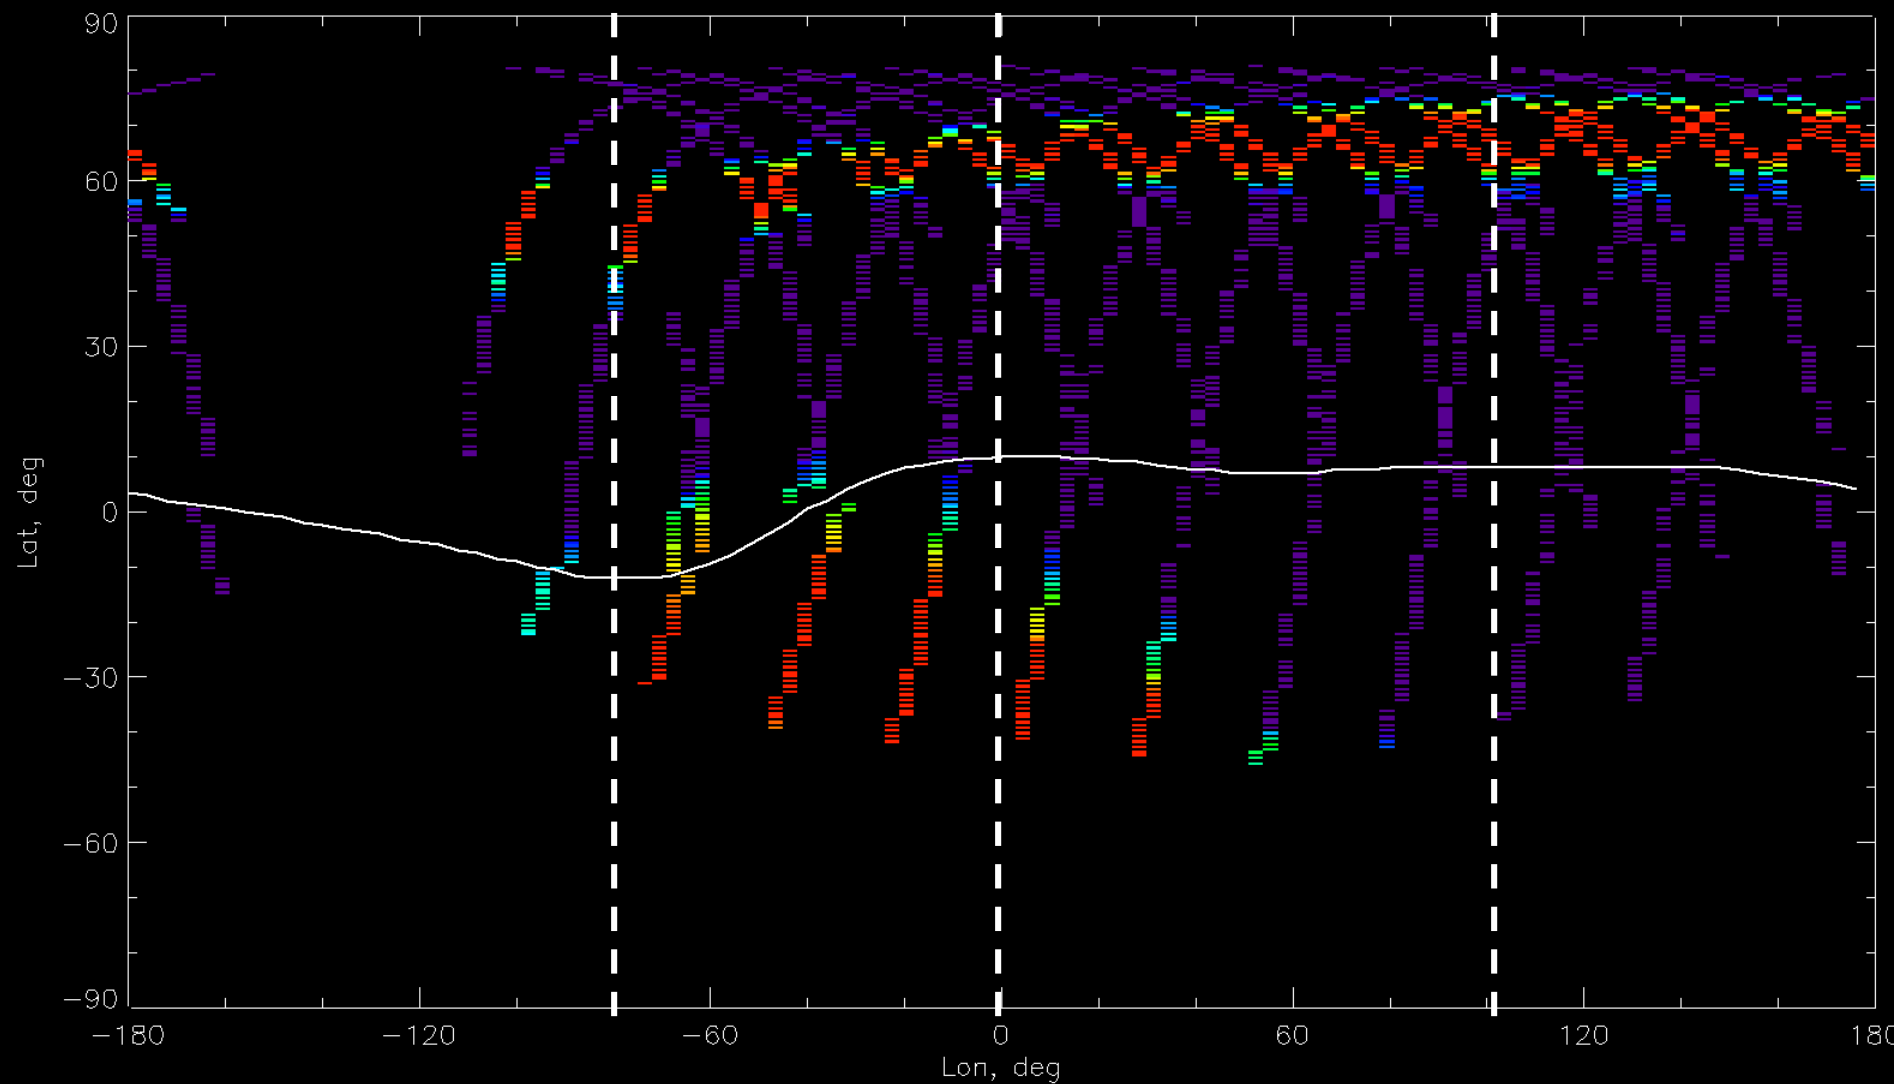

POES  $e > 300$  keV PA=90 avr 2006/08/23 0h - dt=24hmin/max:  $1.0E-001/1.0E+004$ 

POES\_mapGsum\_05

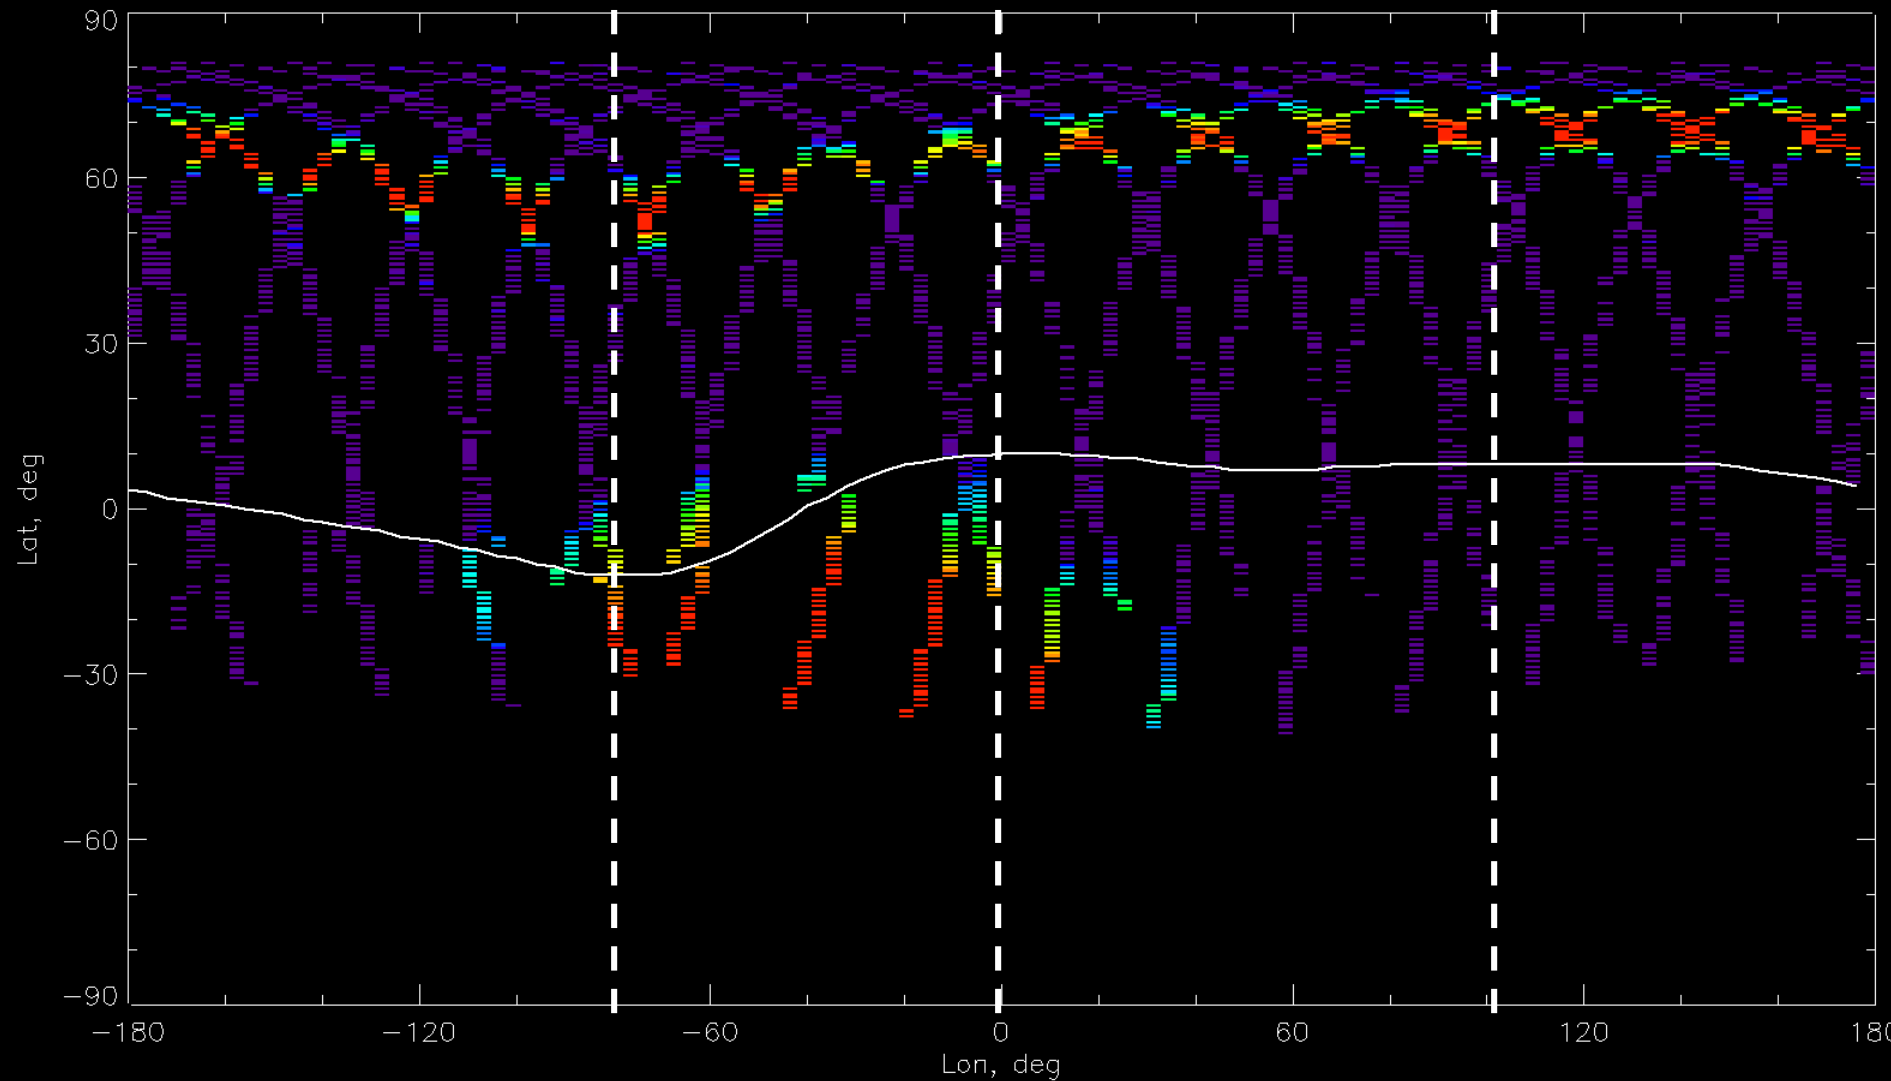

POES  $e > 300$  keV PA=90 avr 2008/08/13 0h - dt=24hmin/max:  $1.0E-001/1.0E+004$ 

POES\_mapGsum\_05

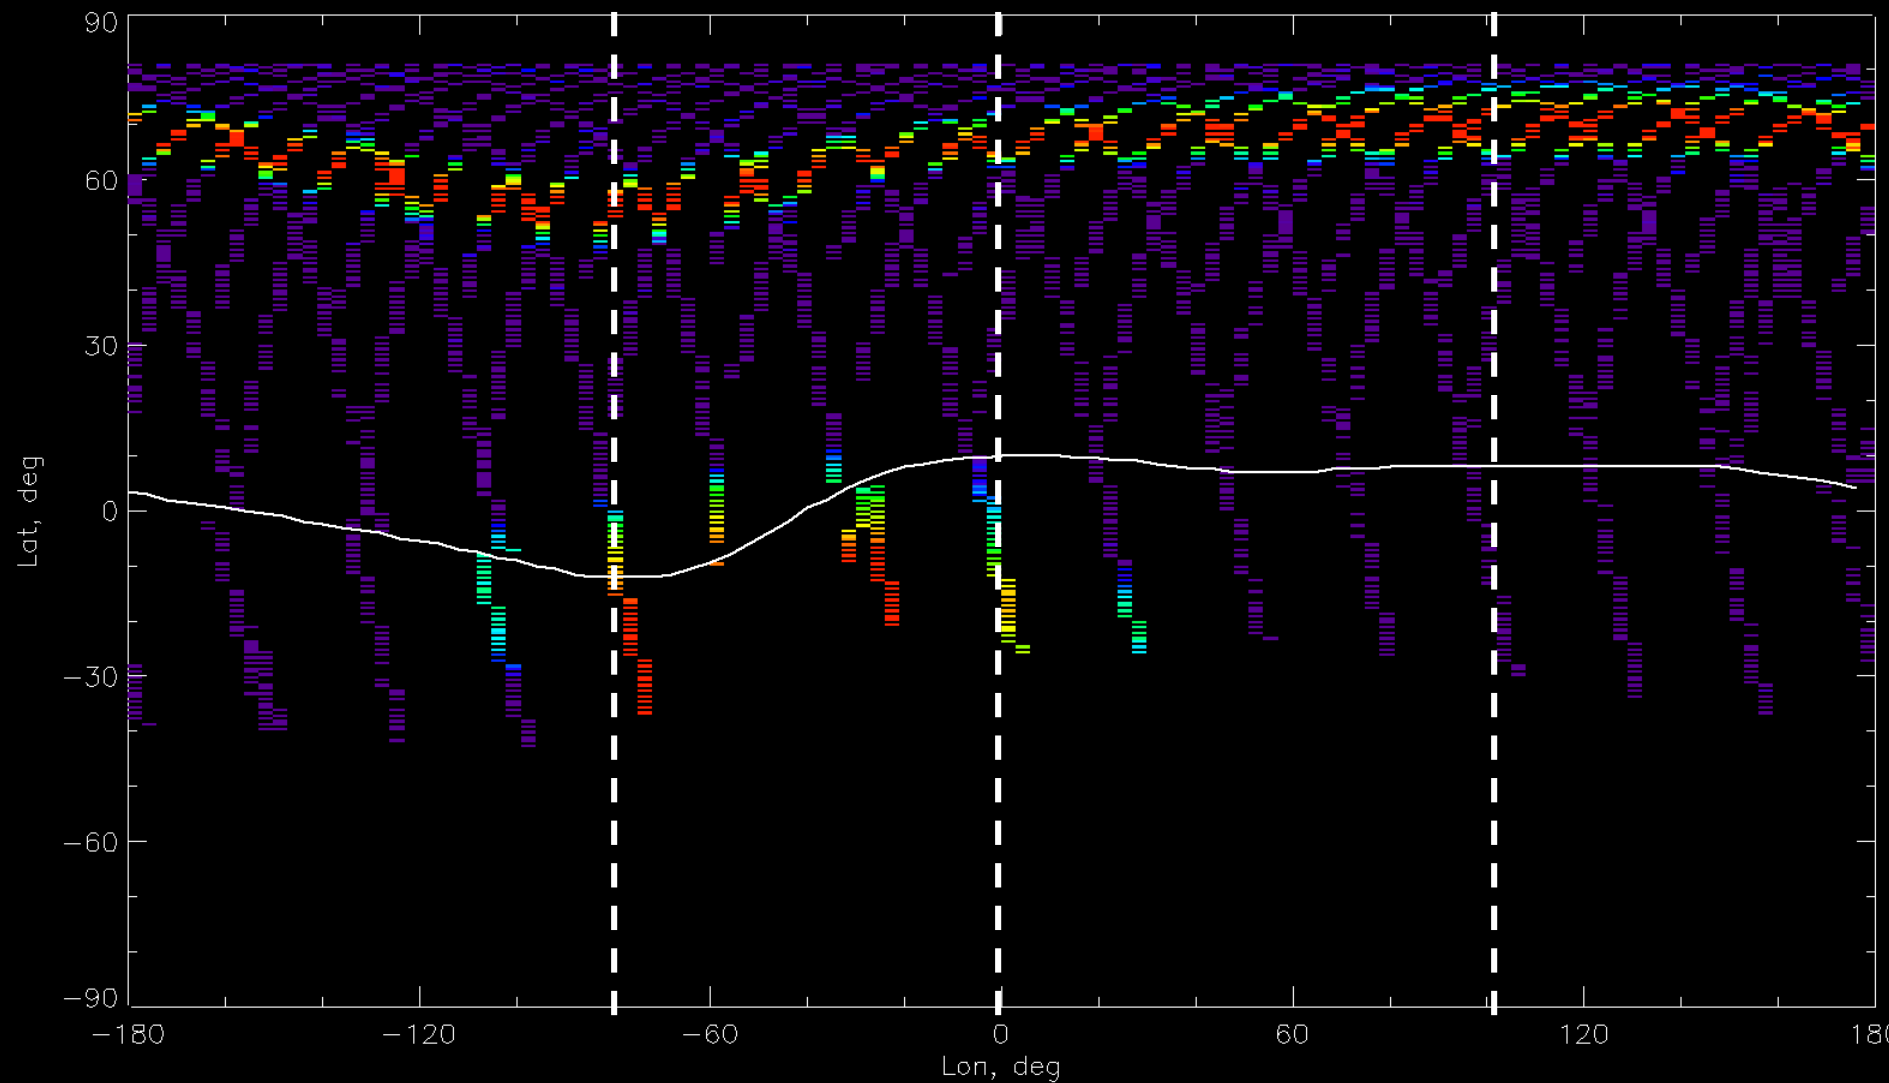



# Set map300

POES e>300 keV PA=90 avr 2009/08/17 0h - dt=24h

min/max: 1.0E-001/1.0E+004

POES\_mapGsum\_05

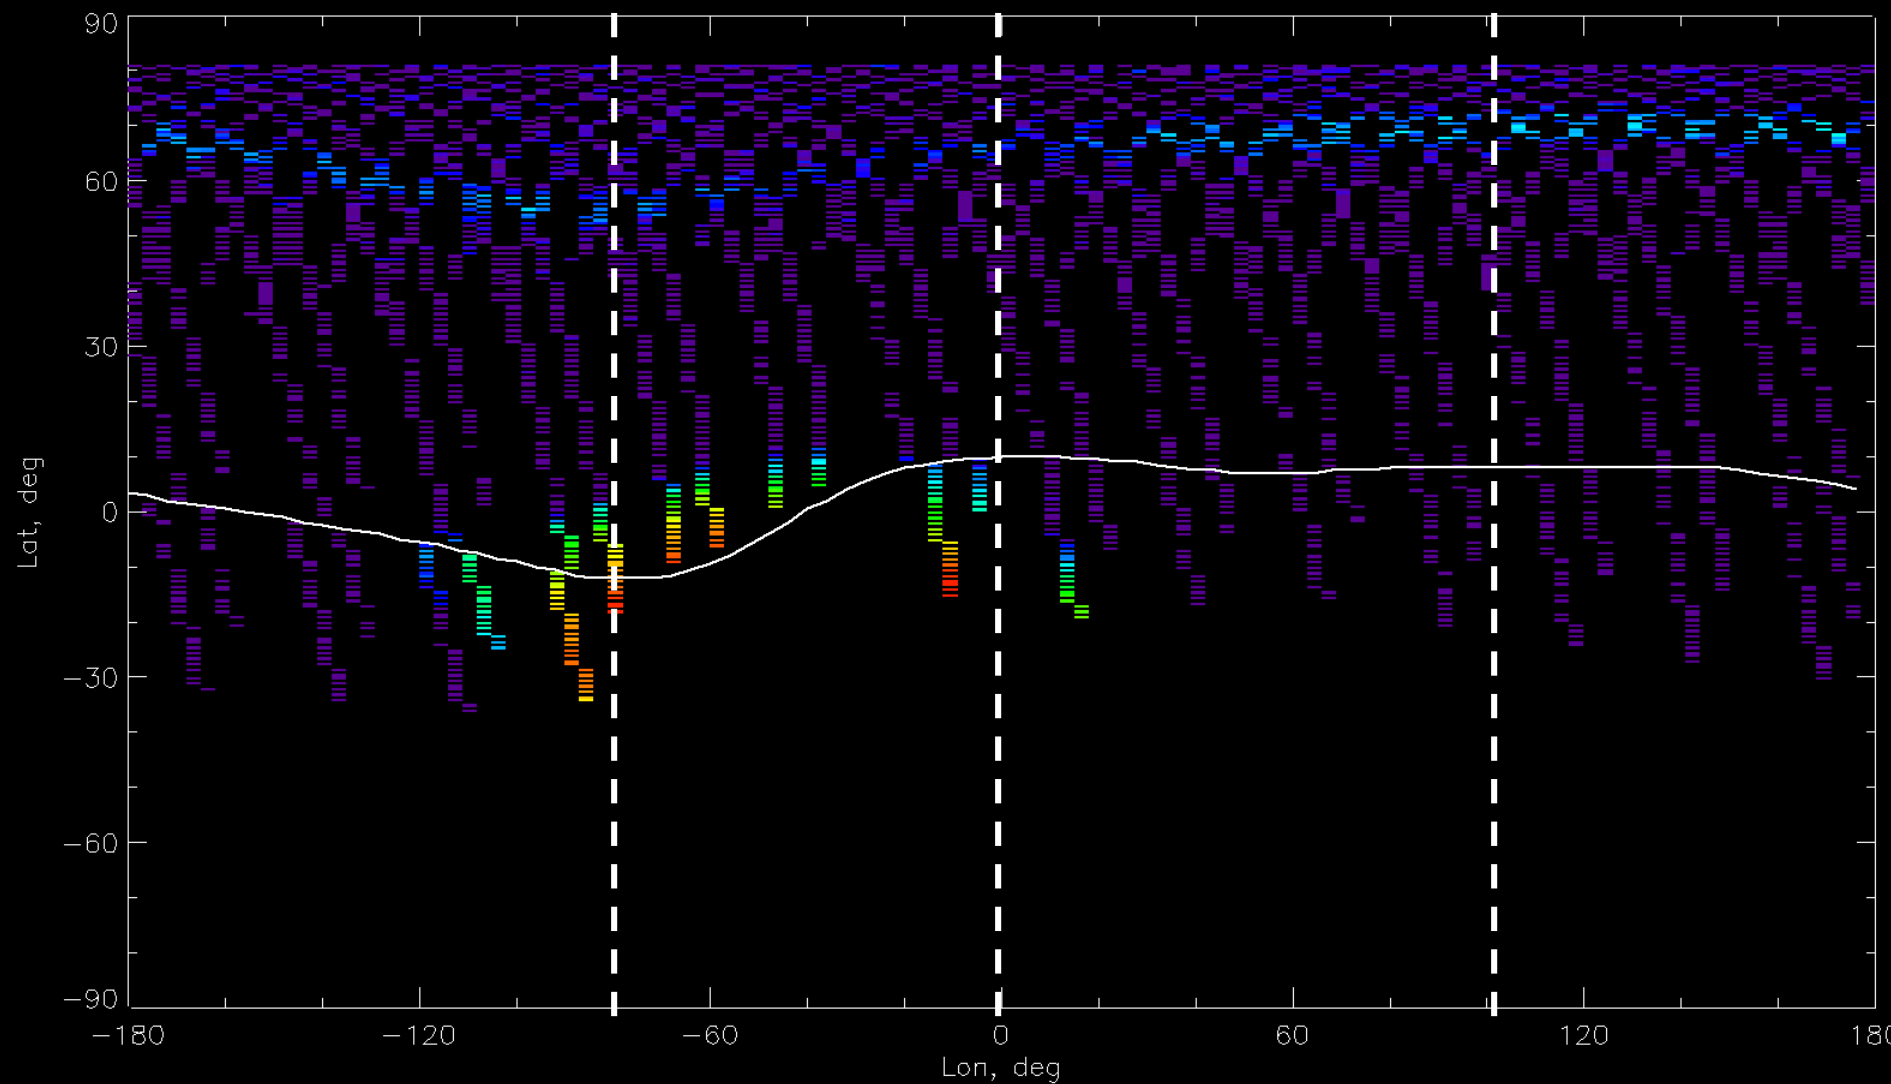

POES  $e > 300$  keV PA=90 avr 2010/08/12 0h - dt=24hmin/max:  $1.0E-001/1.0E+004$ 

POES\_mapGsum\_05

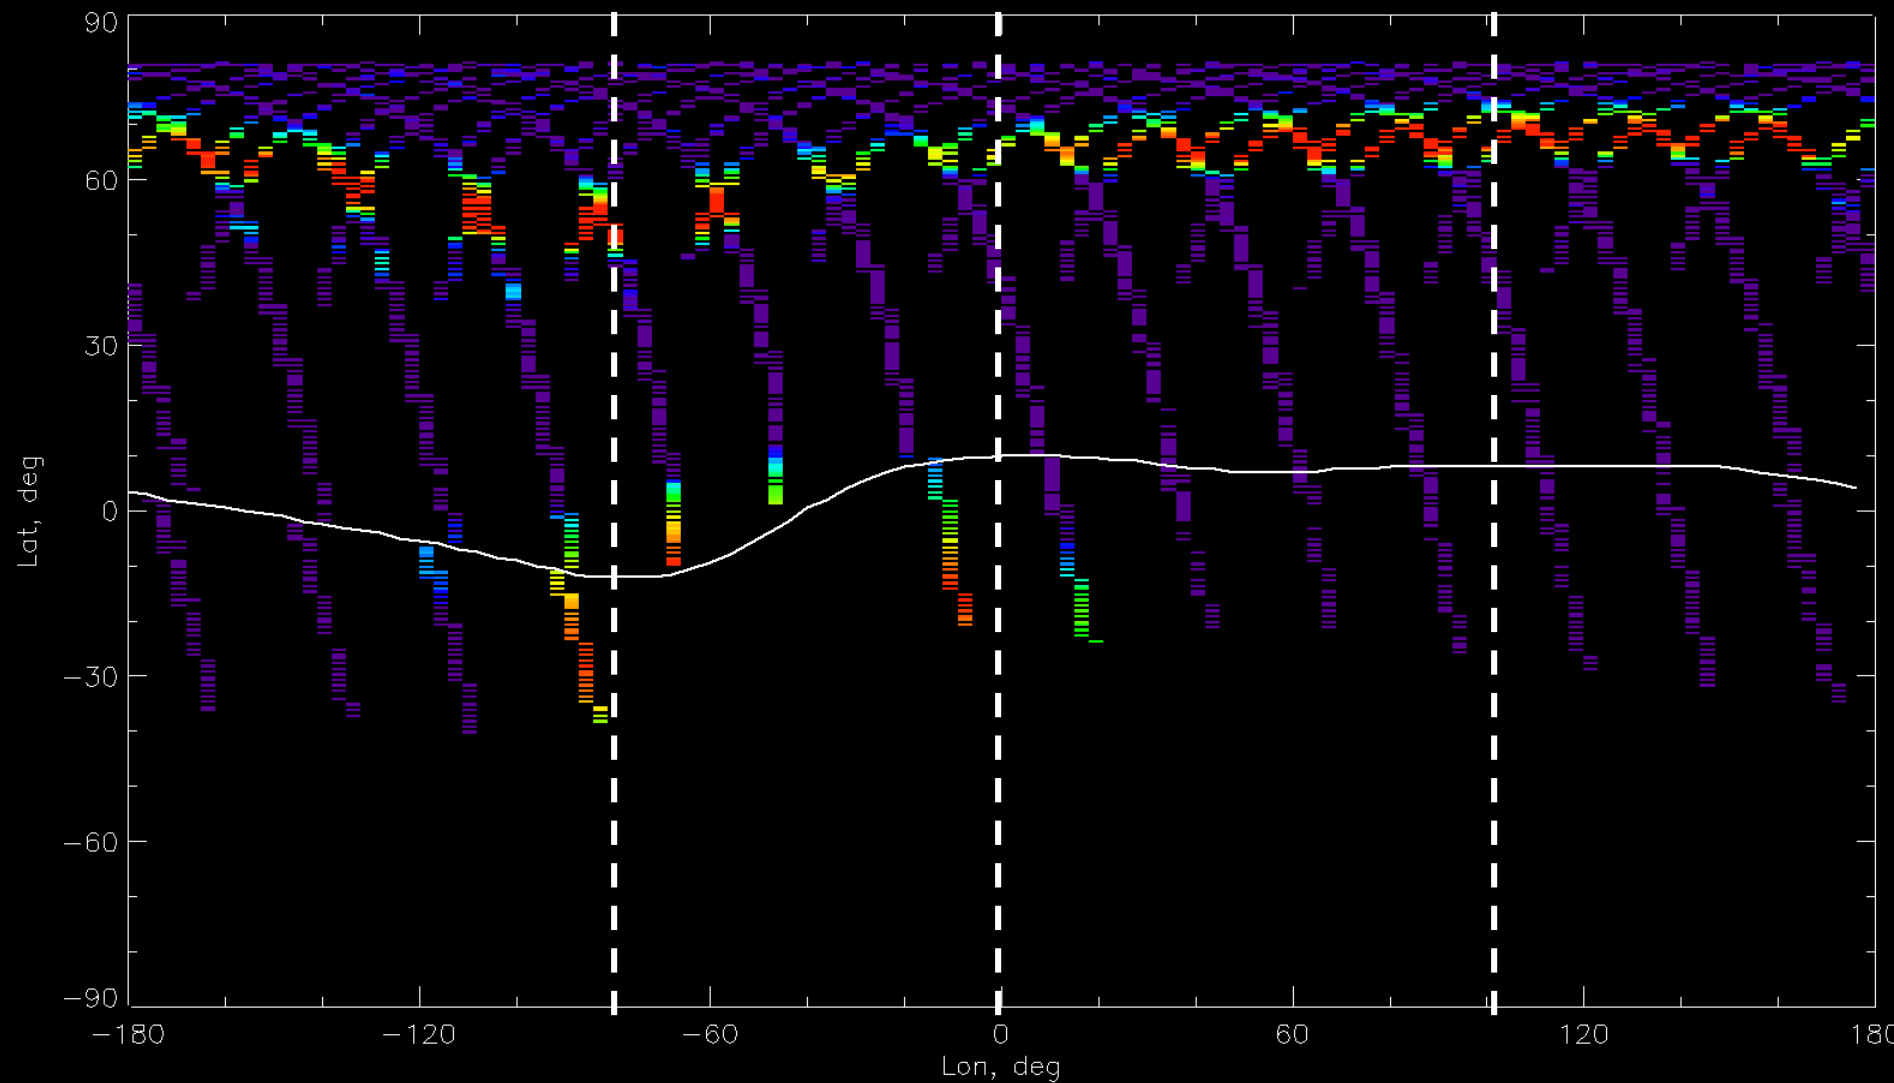

POES  $e > 300$  keV PA=90 avr 2011/08/28 6h - dt=24hmin/max:  $1.0E-001/1.0E+004$ 

POES\_mapGsum\_05

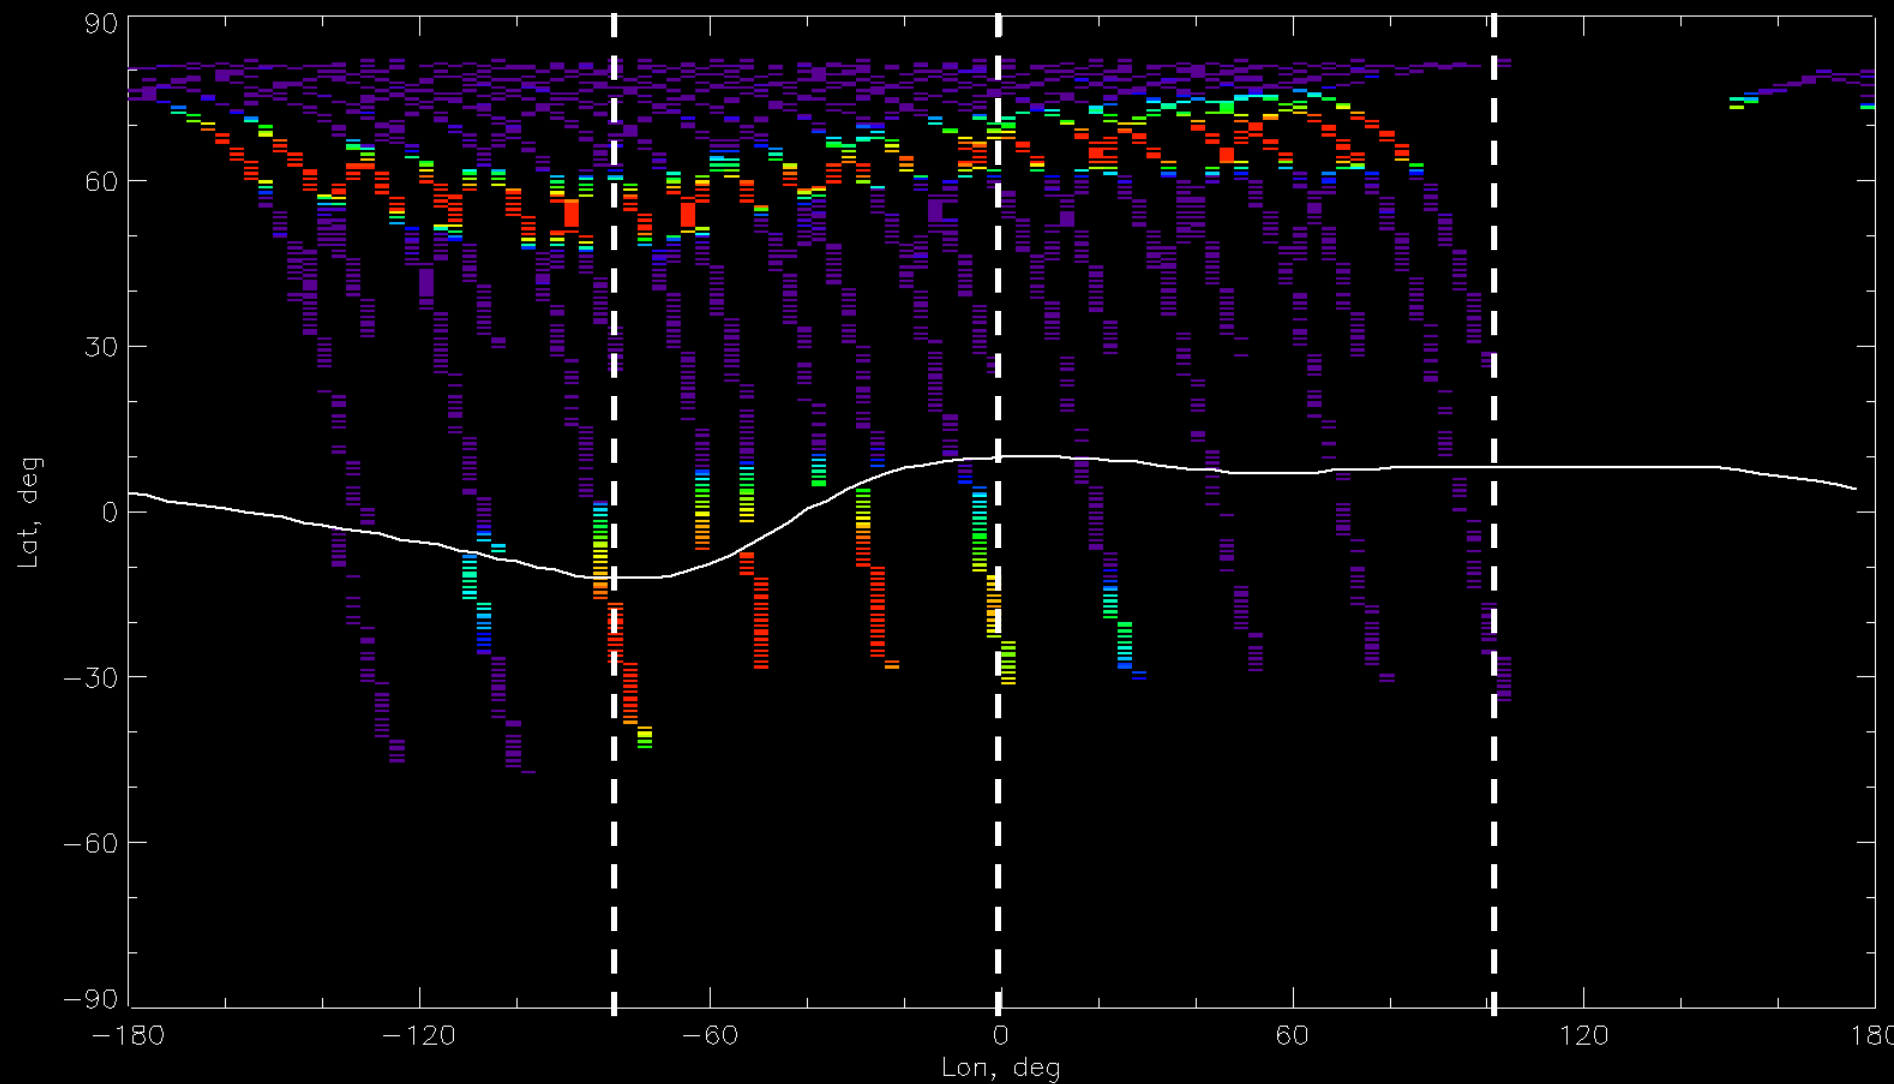

POES  $e > 300$  keV PA=90 avr 2012/08/15 0h - dt=24hmin/max:  $1.0E-001/1.0E+004$ 

POES\_mapGsum\_05

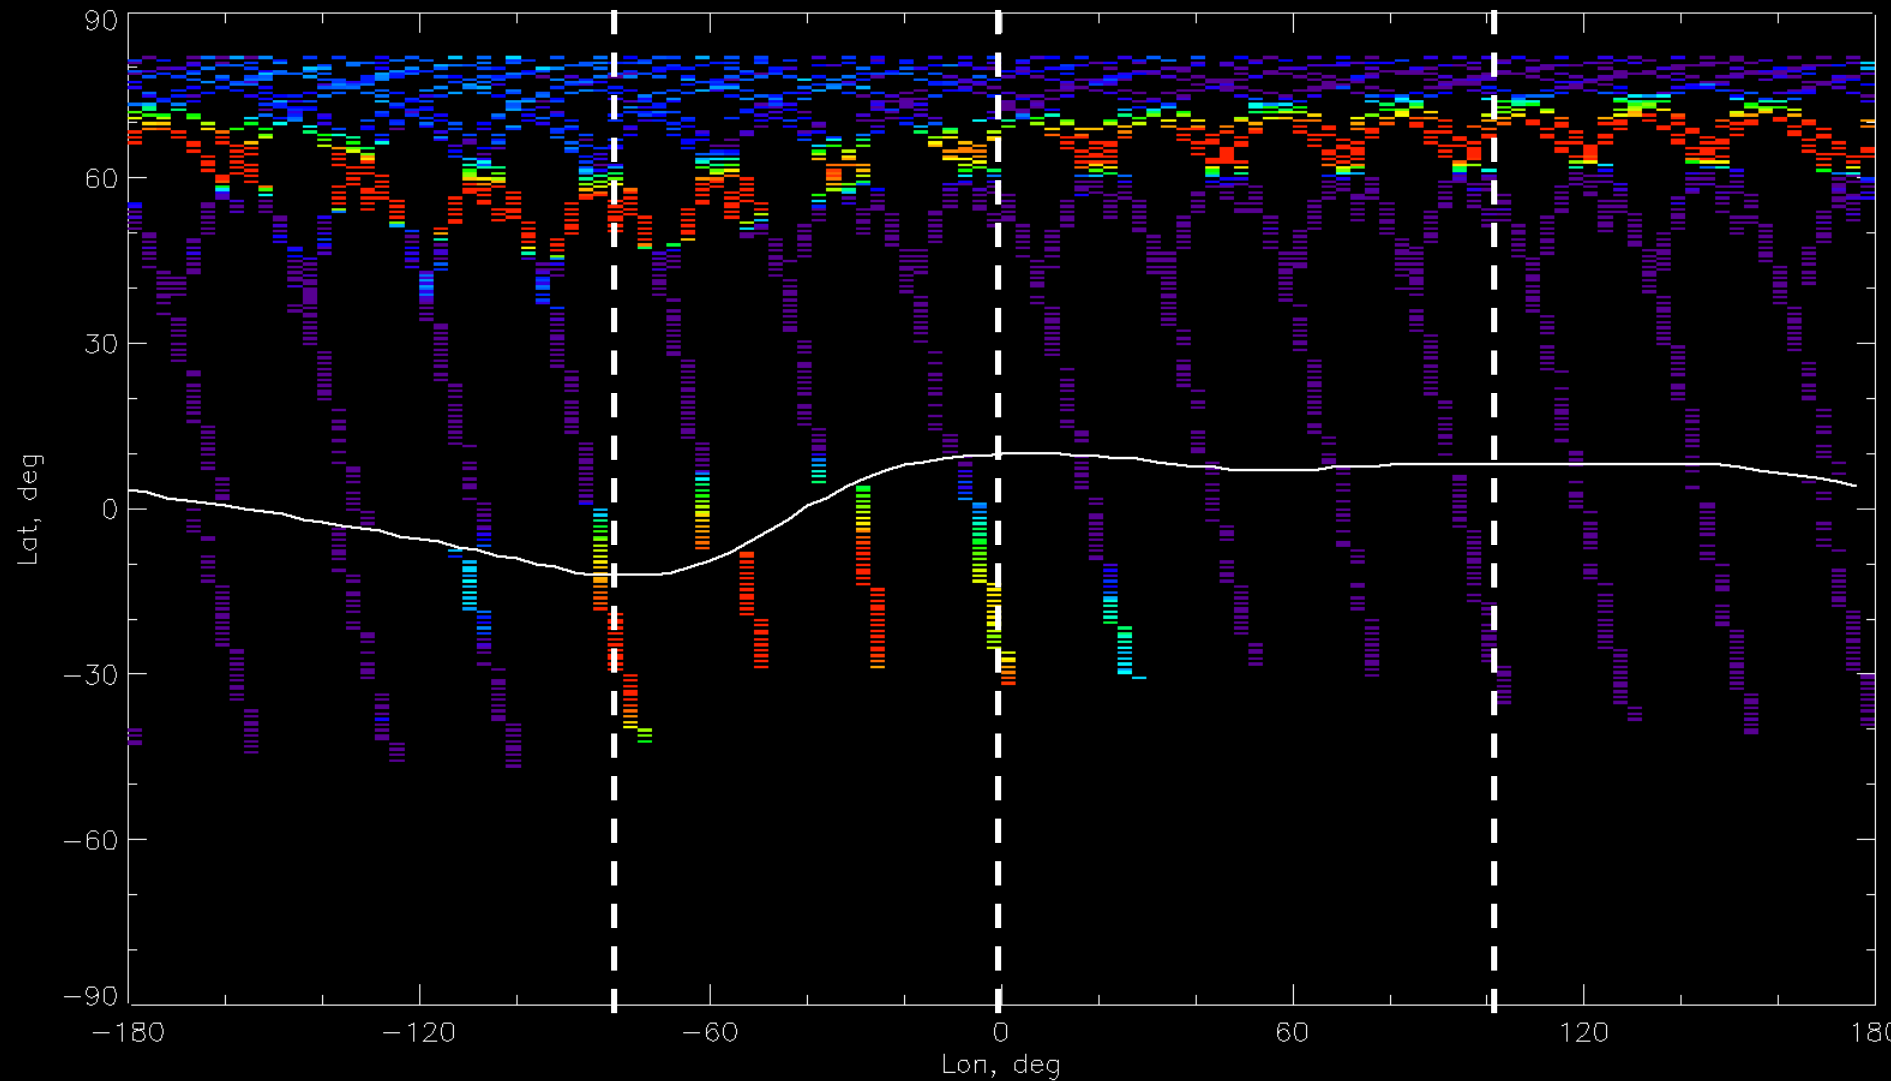

POES  $e > 300$  keV PA=90 avr 2013/08/16 0h - dt=24h

min/max: 1.0E+000/1.0E+005

POES\_mapGsum\_05

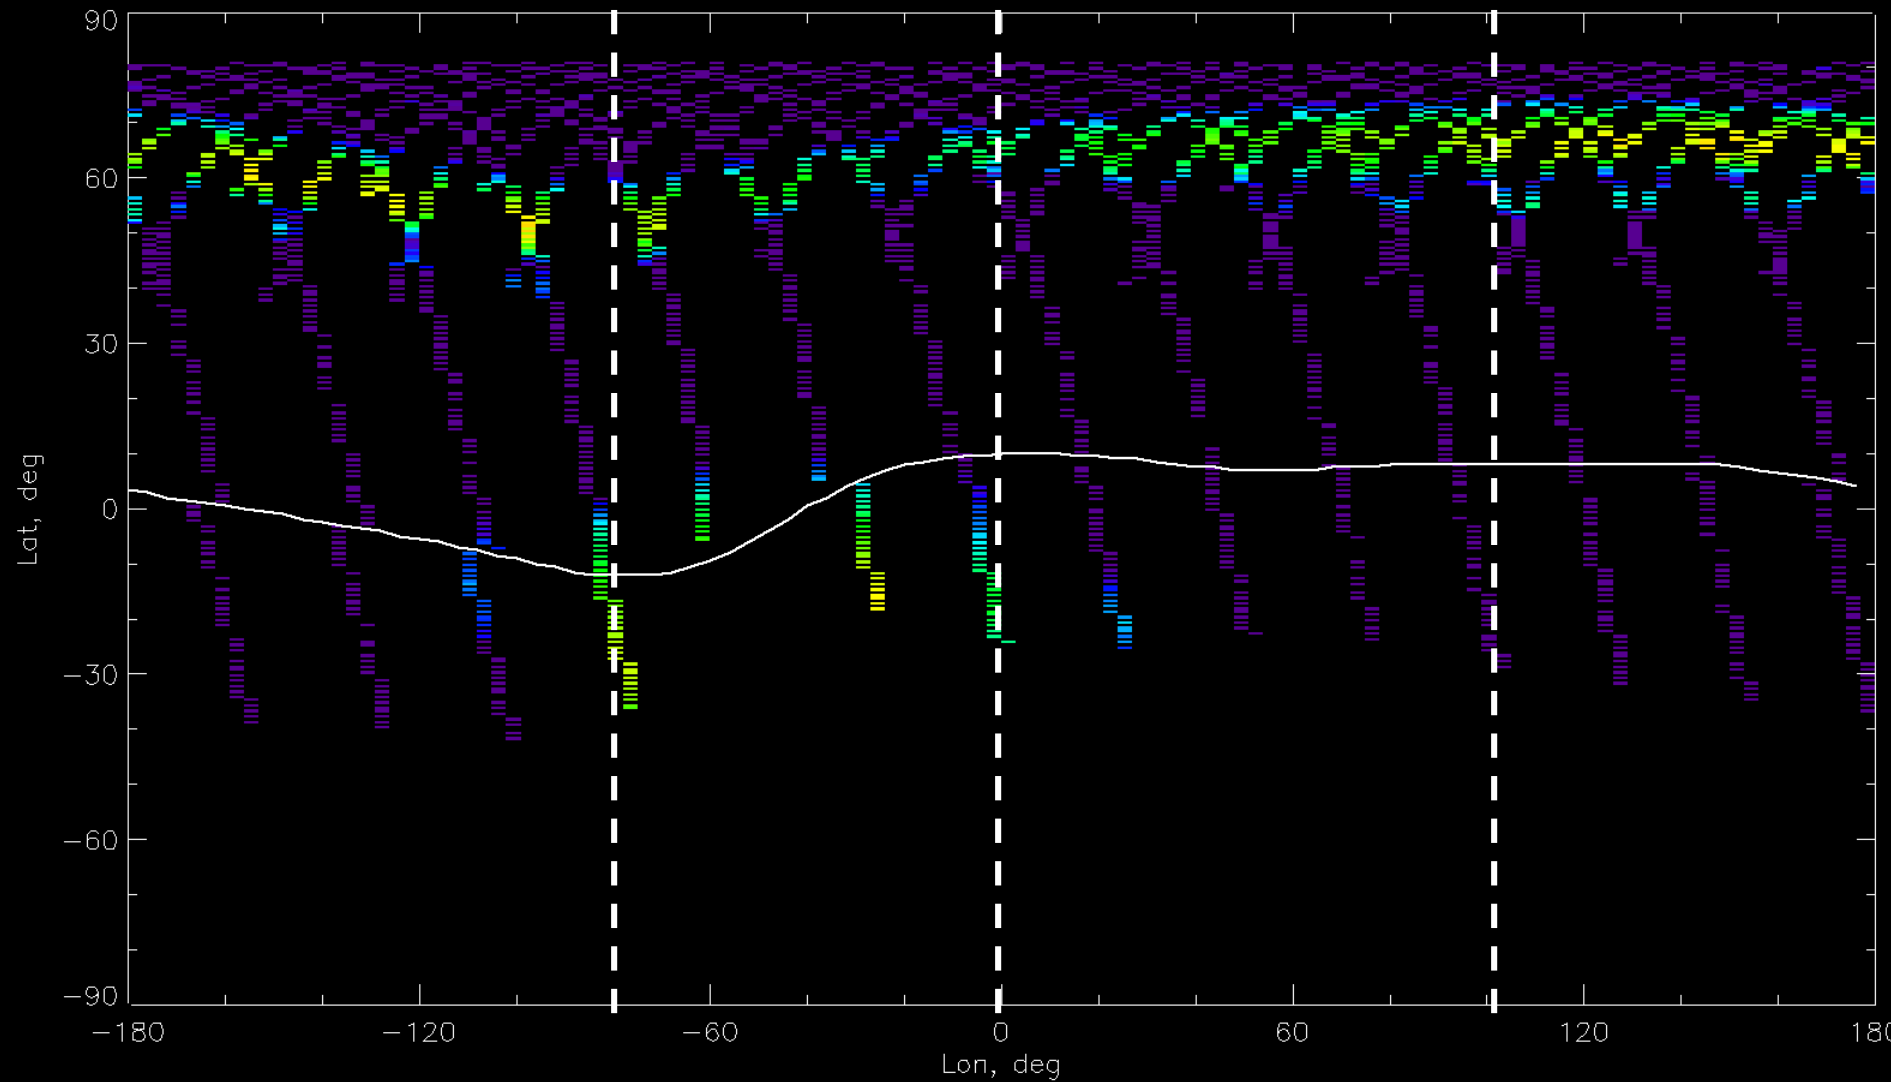

POES  $e > 300$  keV PA=90 avr 2014/08/01 0h - dt=36hmin/max:  $1.0E-001/1.0E+004$ 

POES\_mapGsum\_05

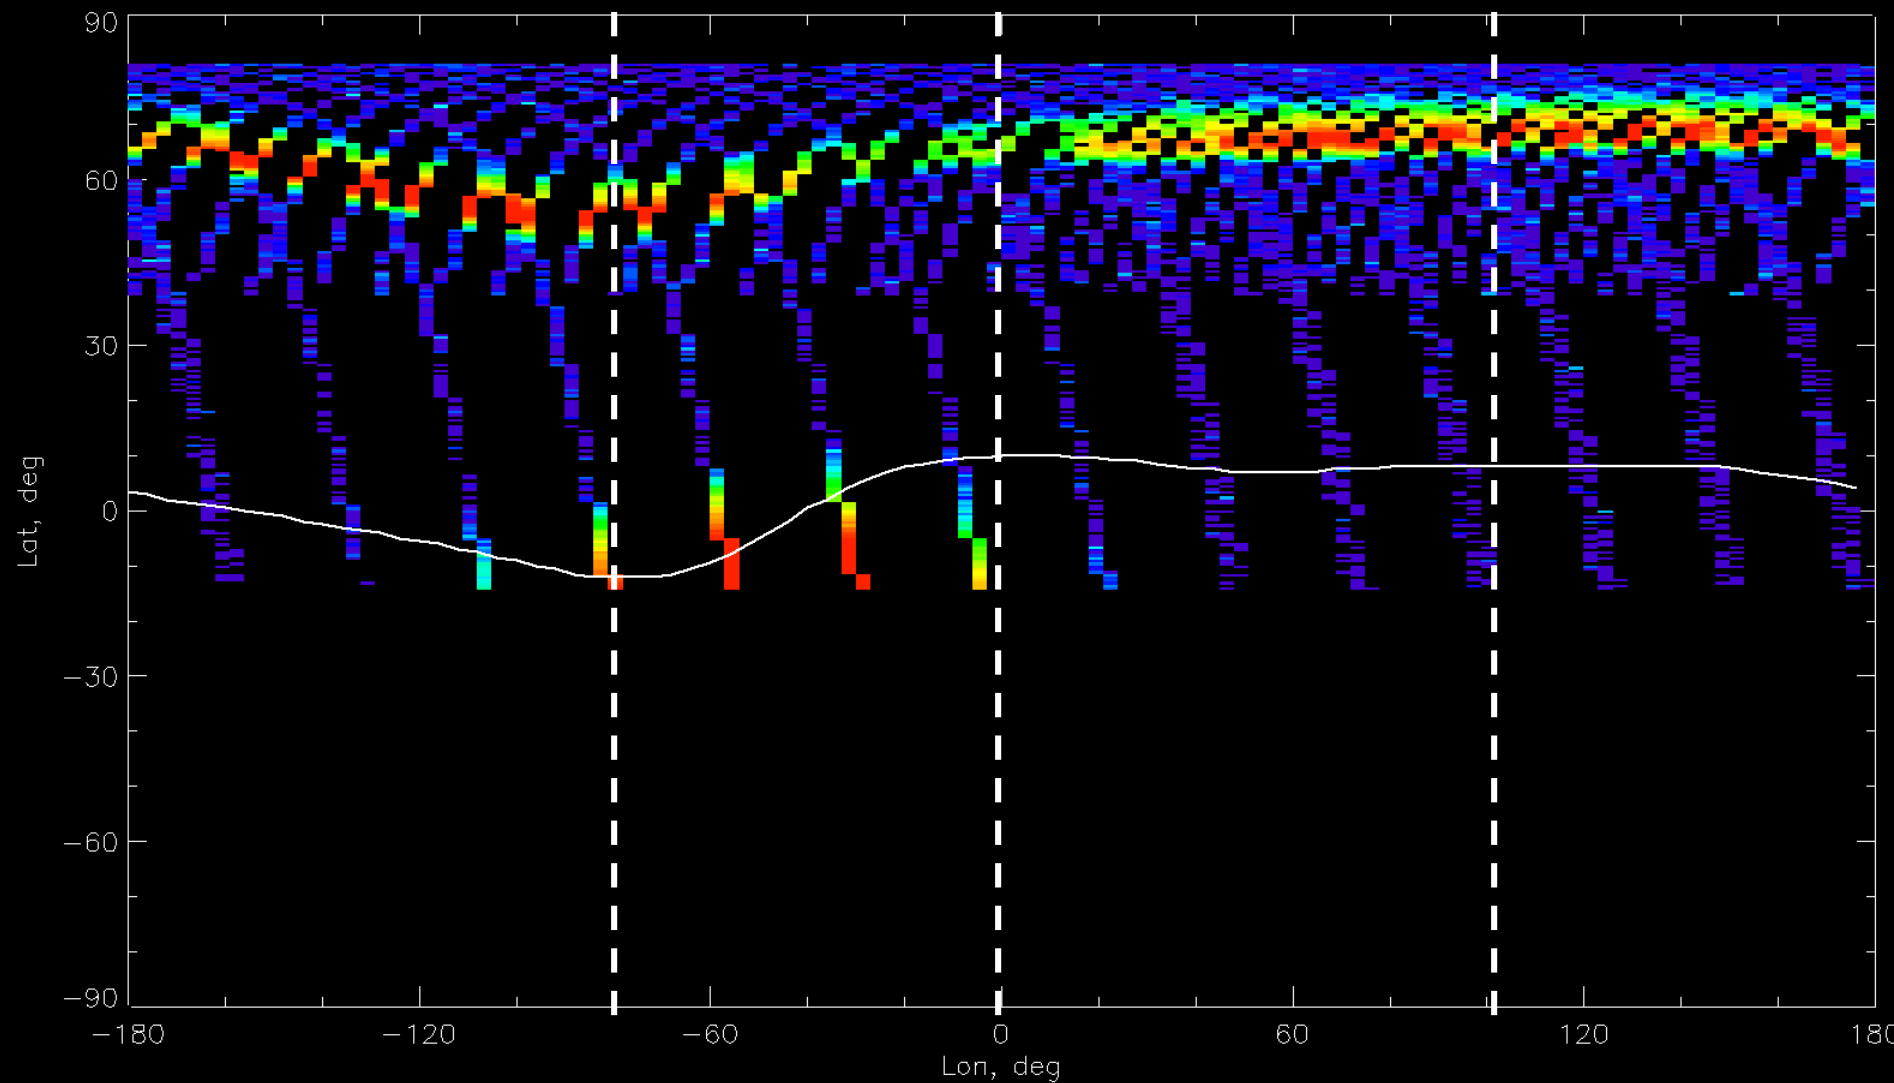

POES  $e > 300$  keV PA=90 avr 2015/08/04 0h - dt=24hmin/max:  $1.0E-001/1.0E+004$ 

POES\_mapGsum\_05

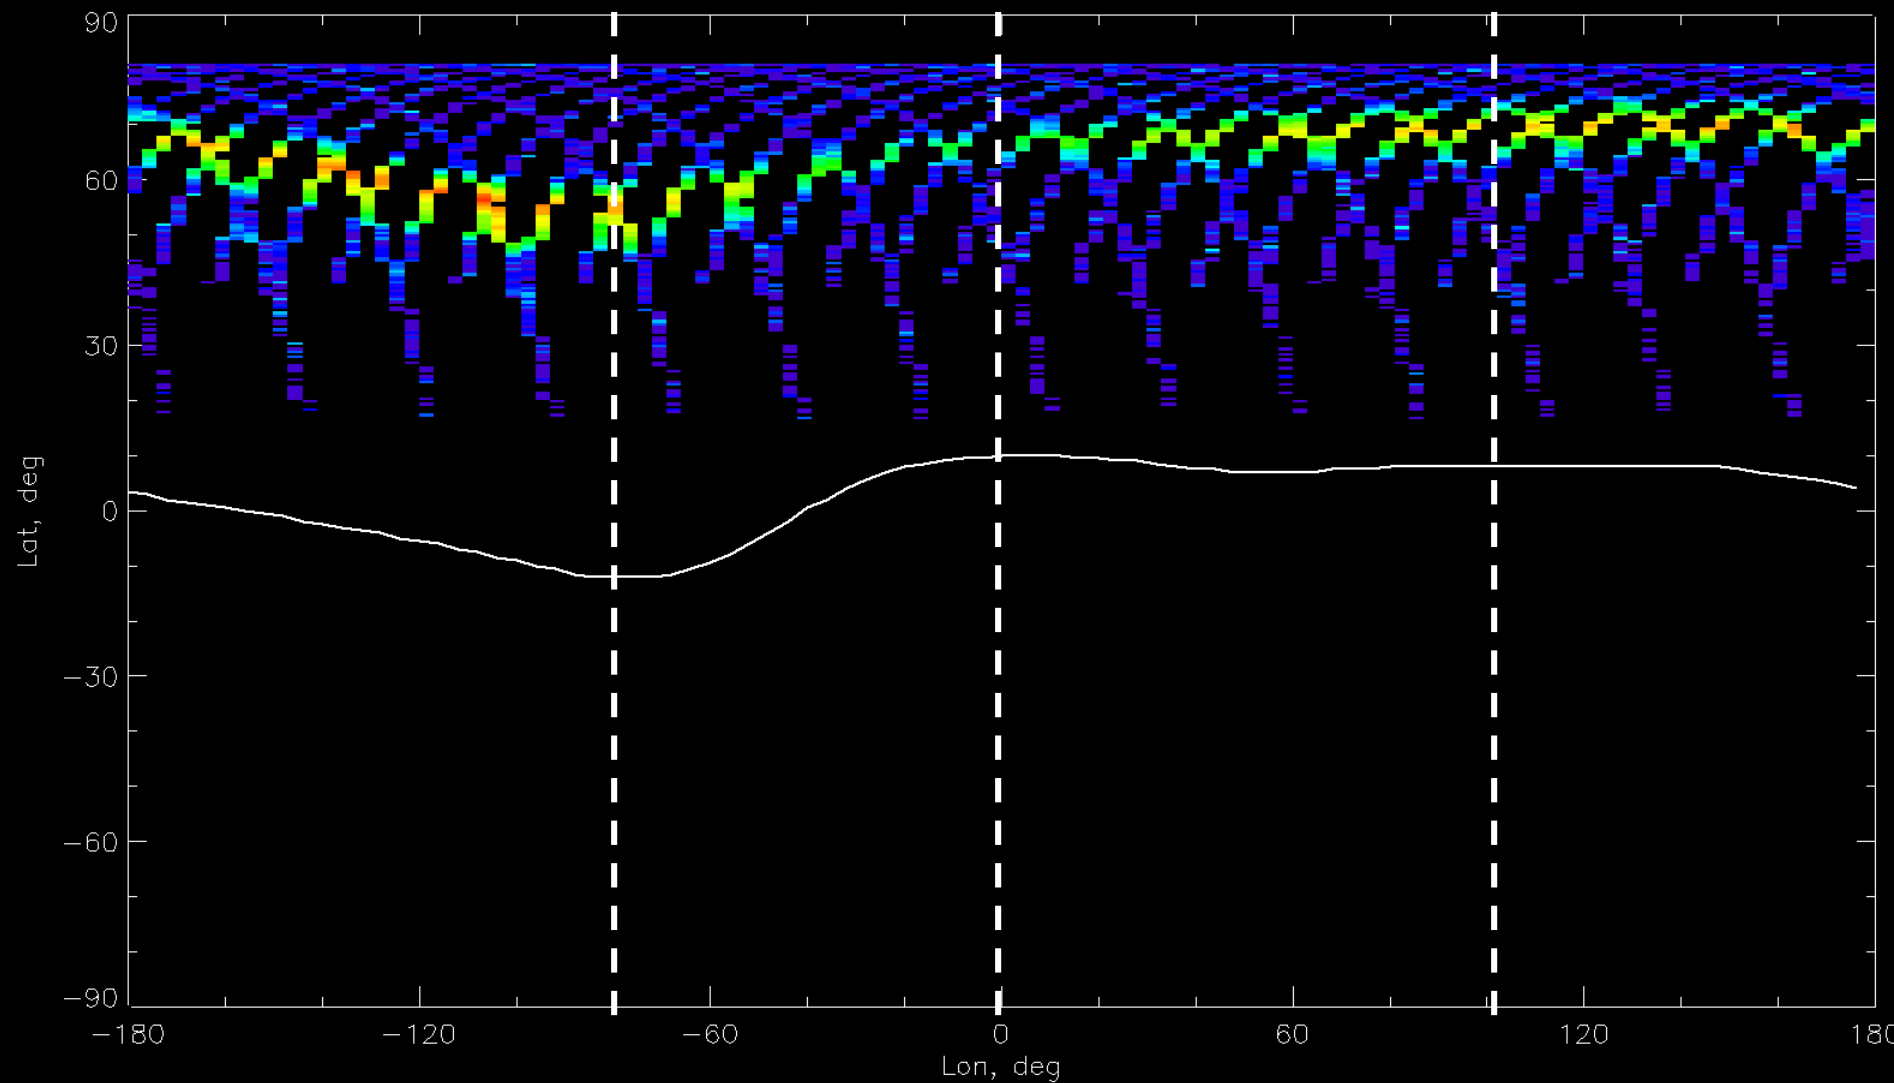

POES e &gt; 300 keV PA=90 avr 2016/06/03 0h - dt=24h

min/max: 1.0E+002/1.0E+004

POES\_mapGsum\_05

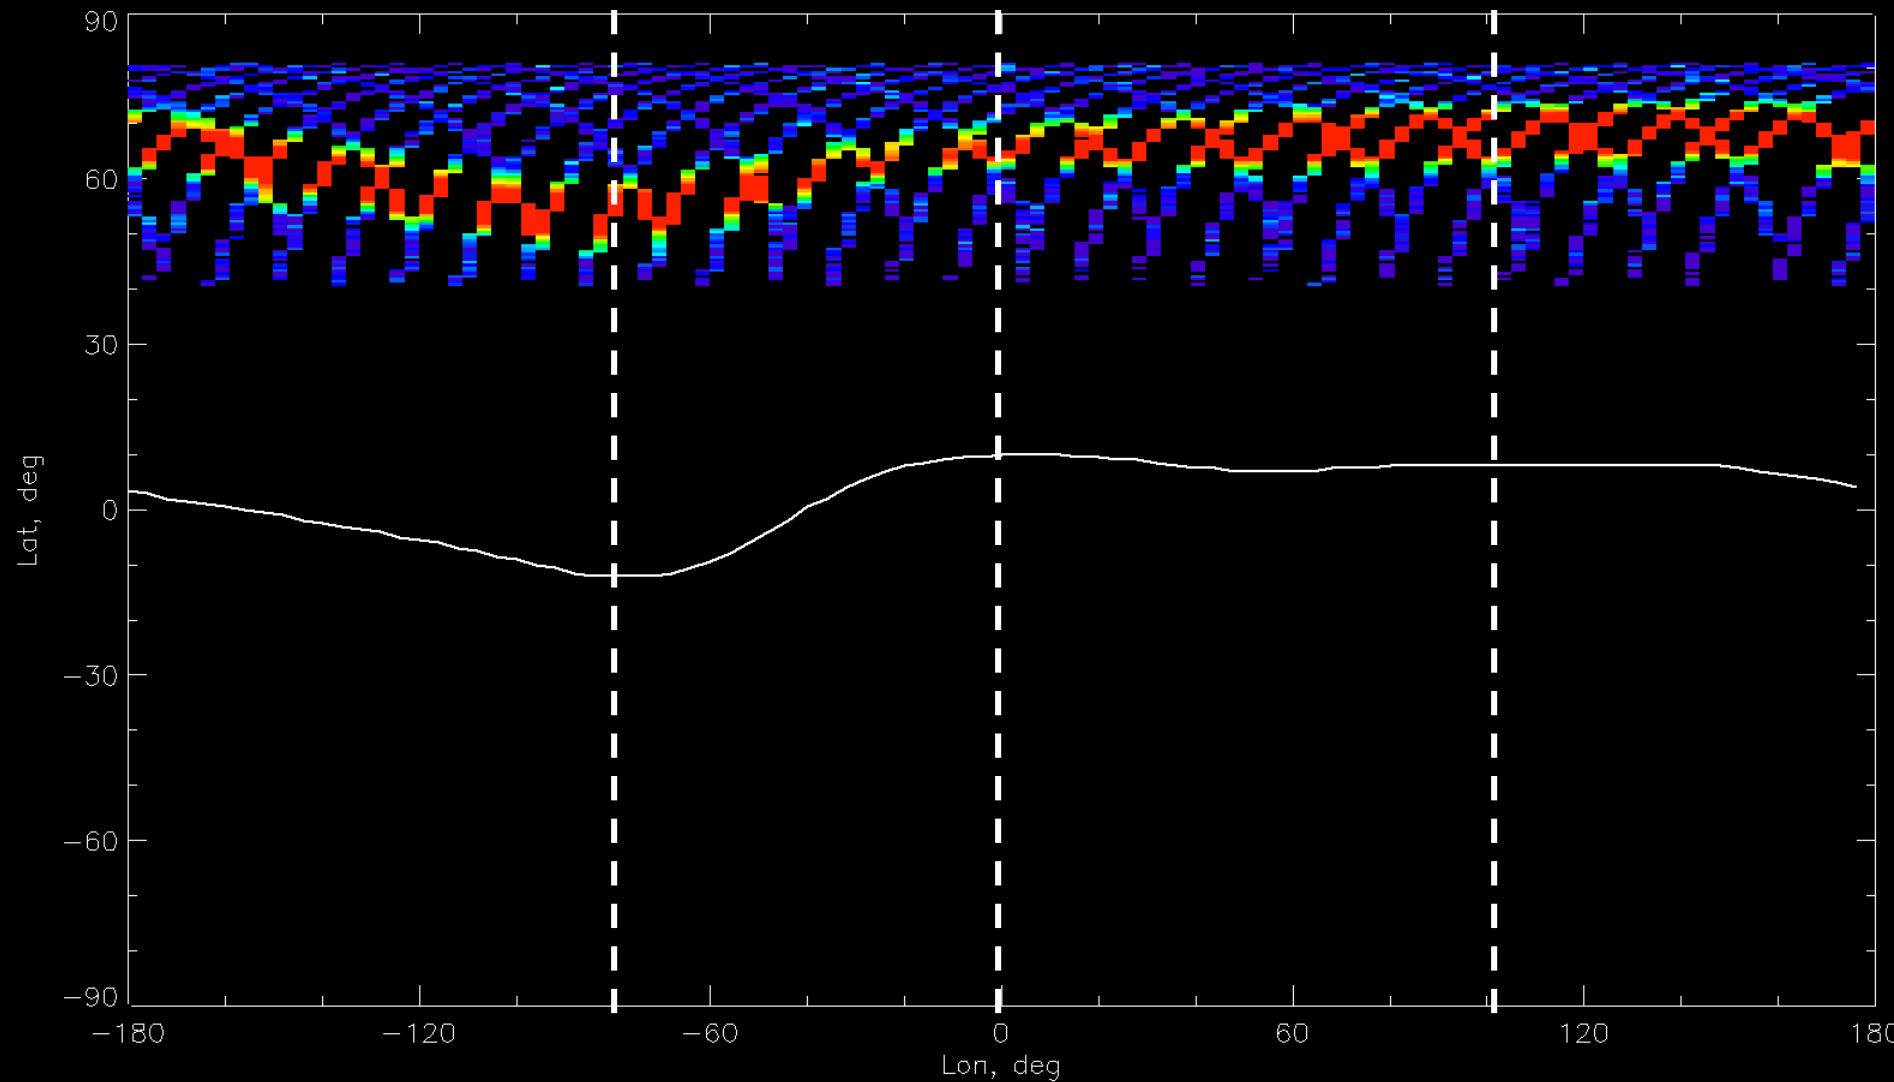



POES  $e > 300$  keV PA=90 avr 2017/08/09 6h - dt=24h

min/max: 1.0E+000/1.0E+005

POES\_mapGsum\_05

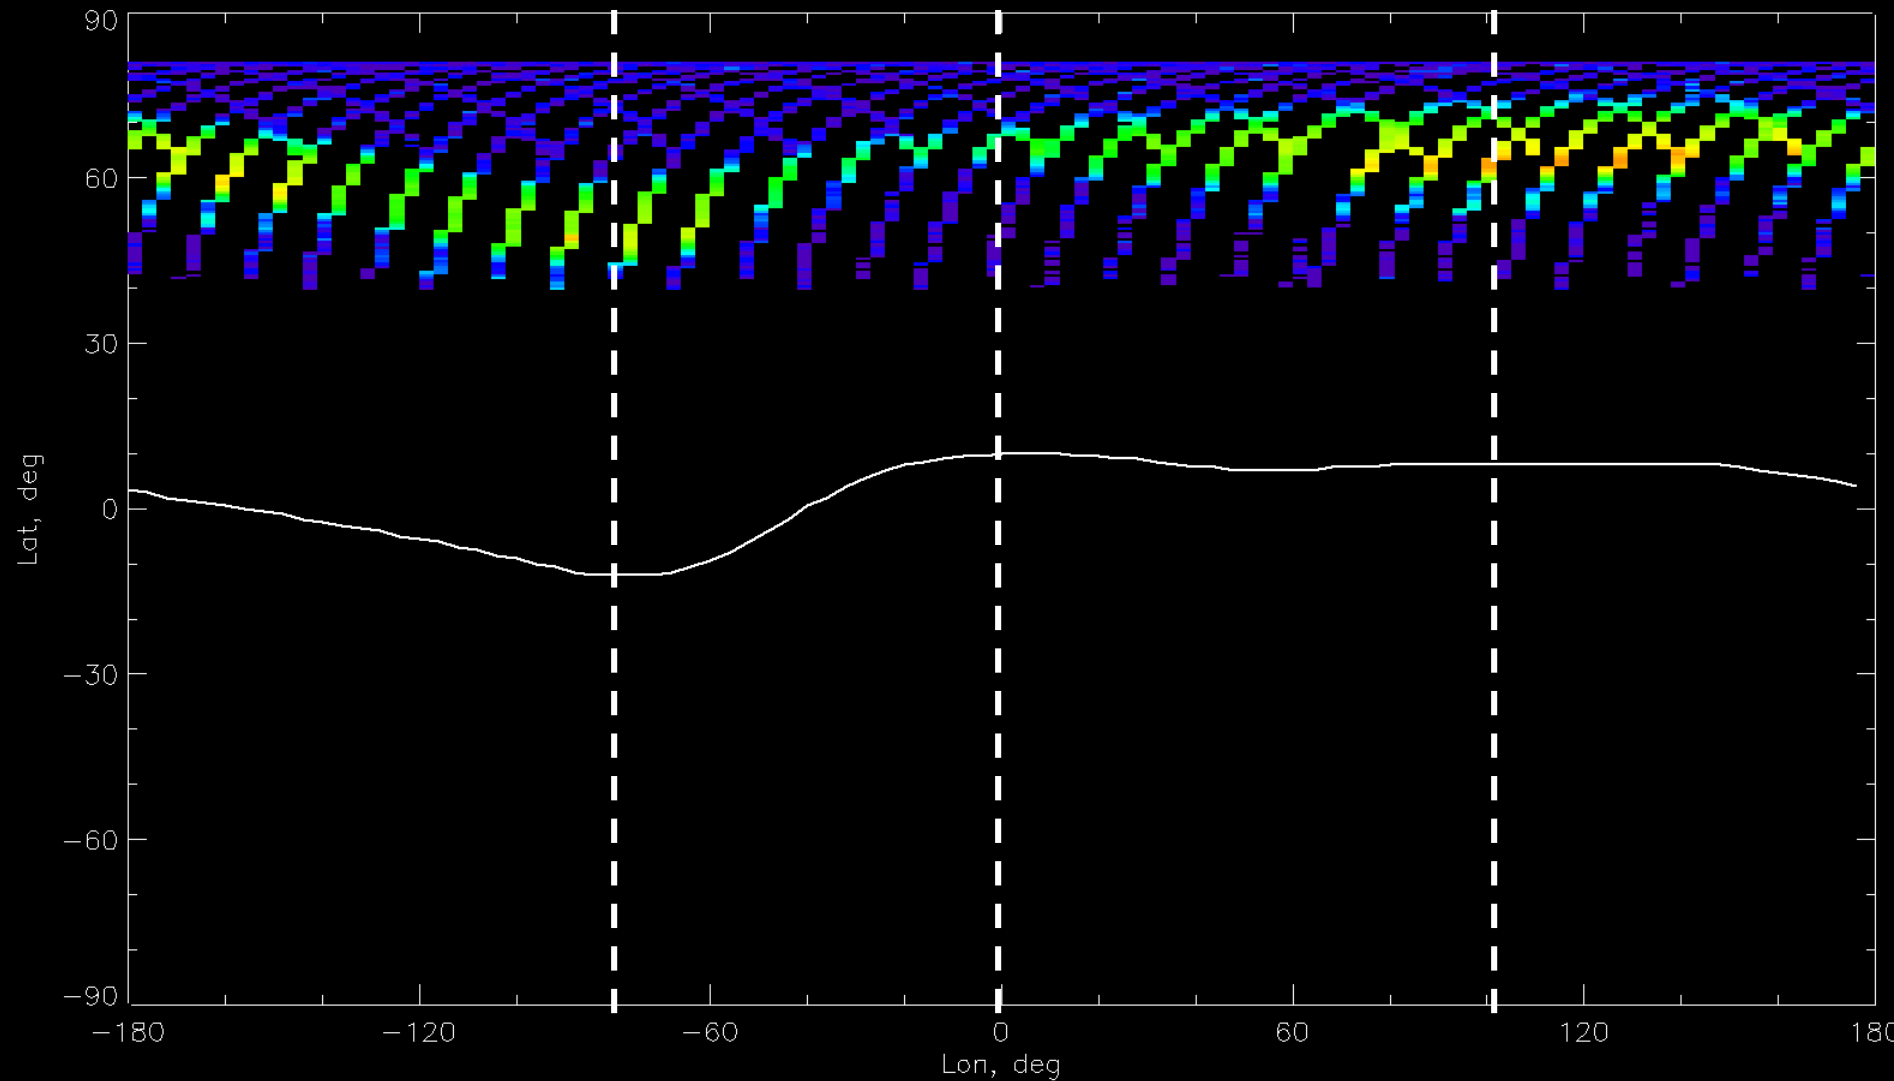

POES e &gt; 300 keV PA=90 avr 2018/06/12 08h - dt=24h

min/max: 1.0E+002/1.0E+004

POES\_mapGsum\_05

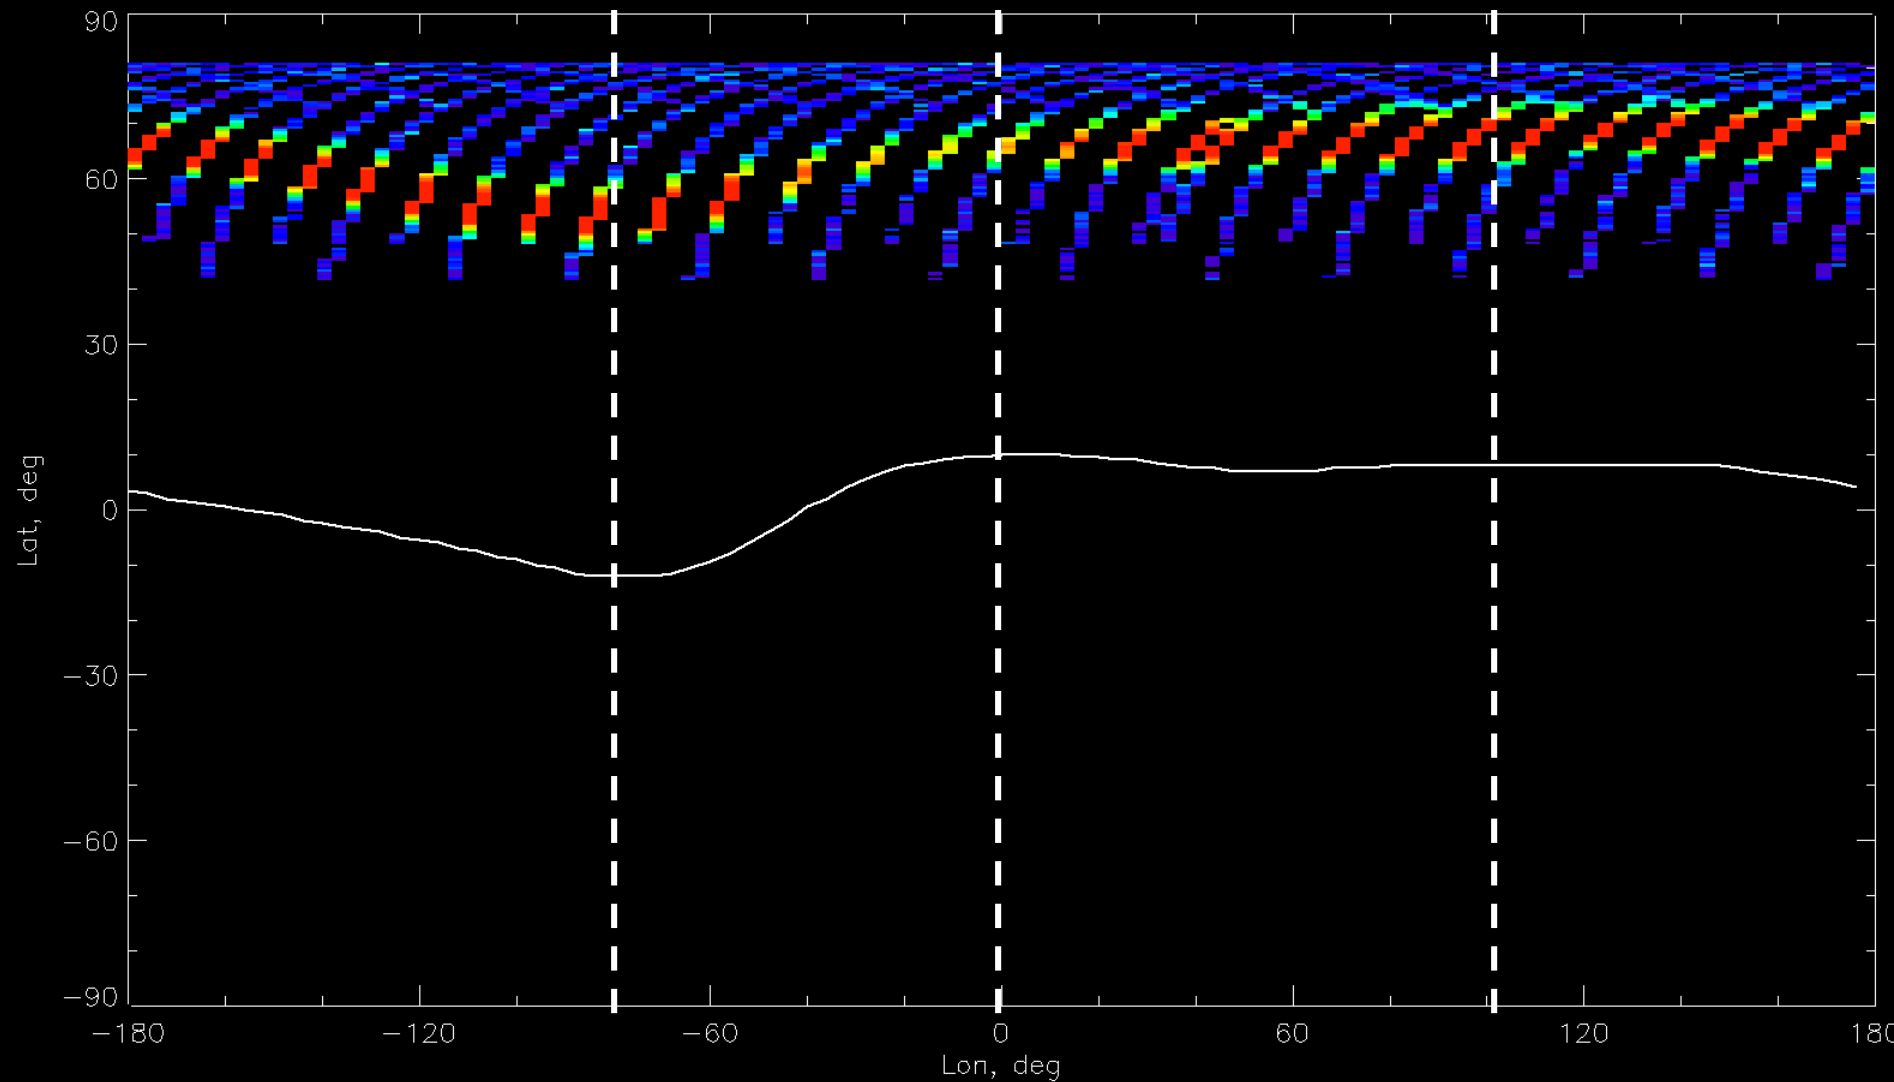

Supplement: Supplementary file 1 [file angeo-2018-118-supplement.pdf]
