# Supplementary material for: On the radiation belt location in the 23–24 solar cycles
Source: Copernicus journal article supplement (doi:10.5194/angeo-2018-118), 2018-11-15
Supplement: Supplementary file [file angeo-2018-118-AC1-supplement.pdf]

# 1 **On the radiation belt location in the 23 – 24 solar cycles**

2

3 **Alexei V. Dmitriev<sup>1,2</sup>**

4 <sup>1</sup>Institute of Space Science, National Central University, Jhongli, Taiwan,

5 <sup>2</sup>Skobeltsyn Institute of Nuclear Physics, Lomonosov Moscow State University, Moscow, Russia,

6

7 Corresponding author: Alexei Dmitriev (dalex@jupiter.ss.ncu.edu.tw)

8

9

## 10 **Abstract**

11 Within the last two solar cycles (from 2001 to 2018), the location of the outer radiation belt (ORB)  
12 was determined with using NOAA/Polar-orbiting Operational Environmental Satellite observations  
13 of energetic electrons with energies above 30 keV. It was found that the ORB was shifted a little  
14 (~1 degrees) in the European and North American sectors while in the Siberian sector, ORB was  
15 displaced equatorward by more than 3 degrees. The displacements corresponded qualitatively to  
16 the change of geomagnetic field predicted by the IGRF-12 model. **However in the Siberian sector,**  
17 **the model has a tendency to underestimate the equatorward shift of ORB.** The shift became  
18 prominent after 2012 that might be related to a geomagnetic jerk occurred in 2012 – 2013. The  
19 displacement of ORB to lower latitudes in the Siberian sector can contribute to an increase in the  
20 occurrence rate of mid-latitude auroras observed in the Eastern Hemisphere.

21

22

23

24 **Keywords:** electron radiation belt, secular geomagnetic variation, mid-latitude aurora

25

## 26 **1. Introduction**

27 The outer radiation belt (ORB) is populated by energetic and relativistic electrons trapped in the  
28 outer zone of the magnetosphere at drift shells above  $L \sim 3$ . The outer zone and ORB are very  
29 dynamic and exhibit variations in a wide temporal range: short-term storm-time and local time  
30 variations, 27-day solar rotation, annual and solar cycle variations (e.g. Li et al., 2001; Miyoshi  
31 and Kataoka, 2011). It was shown that the location of ORB varies with the solar cycle, namely, the  
32 maximum of ORB is mostly distant from the Earth in solar minimum (Miyoshi et al., 2004). The  
33 ORB is substantially disturbed during magnetic storms (Baker et al., 2016; Shen et al., 2017). The  
34 storm-time variation is the strongest one for both the ORB location and intensity. Enhanced  
35 geomagnetic activity results in Earthward shifting of ORB. The annual variation of ORB is a  
36 manifestation of the seasonal variation in the geomagnetic activity (Li et al., 2001).

37 Apparently, the intense variations mask relatively weak long-term changes related to a secular  
38 variation of the core and crustal magnetic fields. Recently, a number of authors reported significant  
39 changes in the Earth's magnetic field. The magnetic axial dipole has decreased over the past 175  
40 years by 9% (e.g. Finlay et al., 2016). It was also shown that the north magnetic dip pole, the point  
41 where the magnetic field inclination is vertical, drifted from Canada toward Siberia with the speed  
42 rapidly increasing from 10 km/yr in 1990s to more than 50 km/yr at present (Chulliat et al., 2010;  
43 Thebault et al. 2015). From 1989 to 2002, most dramatic magnetic field changes of  $>50$  nT/yr have  
44 been found in the Canadian Arctic and Eastern Siberia.

45 The effects of dipole decay and pole drift are predicted by International Geomagnetic Reference  
46 Field 12th generation (IGRF-12) model (e.g. Thebault et al. 2015). However in the Siberian sector,  
47 significant anomalies of the main geomagnetic field were found at high latitudes within the  $80^{\circ}$ - $130^{\circ}$   
48 longitudinal range (Gvishiani et al., 2014). In this sense, independent verification of changes in the  
49 geomagnetic field at high and middle latitudes is required. Namely, the decrease of magnetic dipole  
50 should result in a global equatorward shifting of the outer magnetospheric domains such as ORB  
51 and auroral region. The drift of the north magnetic pole should cause a decrease(increase) of ORB  
52 and auroral latitudes in the Siberian(North American) sectors.

53 The long-term changes in the location of auroral region were reported by Smith et al. (2017). They

54 analyzed the latitudinal location of auroral electro jet (AEJ) and revealed a prominent latitudinal  
55 displacement of the AEJ by several degrees in the years 2004 – 2014 relative to the previous solar  
56 maxima in 1970 and 1980. Namely, in the Siberian sector, AEJ shifted to lower latitudes and in the  
57 American sector, AEJ shifted to higher latitudes. The opposite shifts in different sectors cannot be  
58 explained by the solar cycle variation and, thus, it has been attributed to the core and crustal  
59 magnetic fields. On the other hand, the technique of auroral precipitations is hard to use for tracing  
60 of the long-term geomagnetic variations because of high variability in the intensity, location and  
61 extension of aurora (e.g. Cresswell-Moorcock et al., 2013; Smith et al.; 2017).

62 An additional support of prominent changes in the geomagnetic field can be found from a sudden  
63 increase of occurrence of aurora borealis during the years of 2015 to 2017. There were numerous  
64 reports about aurora borealis observed at middle latitudes in the North America, Europe and Russia.  
65 Table 1 lists the days when discrete aurora was detected in big Russian cities Moscow (geographic  
66 location 55°45N 37°37E), St. Petersburg (geographic location 59°57N 30°18E) and Novosibirsk  
67 (geographic location 55°01N 82°55E). It is important to note that while in the North American  
68 region, the mid-latitude discrete aurora is observed quite often, this phenomenon is rare at lower  
69 magnetic latitudes such as in the regions of Central Europe and in particular in Central Russia  
70 (MacDonald et al., 2015; Vázquez et al., 2016). The previous low-latitude aurora borealis was  
71 observed during extremely strong geomagnetic storms with minimum  $Dst < -300$  nT on October -  
72 November 2003 (e.g. Shiokawa et al., 2005; Mikhalev et al., 2004; Kataoka et al., 2015).

73 In contrast, magnetic storms in 2015 – 2017 were not very intense, as one can see in Table 1. The  
74 strongest storm on 17 – 18 March 2015, so-called St. Patrick's Day storm, had minimum  $Dst$  of  
75 -220 nT. During the St. Patrick's Day storm, aurora borealis was observed worldwide in North  
76 America, Central Europe (e.g. "Strongest geomagnetic storm of SC24 sparks spectacular aurora  
77 display" at <https://watchers.news/2015/03/18/>) and in a number of cities in Central Russia and  
78 Siberia (e.g. <https://www.rt.com/news/241845-aurora-borealis-central-russia/>). Case et al. (2015)  
79 found that during the storm, the discrete aurora was observed at unusually low latitudes, which  
80 were much lower than those predicted by models of Roble and Ridley (1987) and Newell et al.  
81 (2010).

82 The aurora is produced by charged particles precipitating from the outer regions of the  
83 magnetosphere to the high-latitude atmosphere. The charged particles move along the magnetic  
84 field lines and, thus, the location of precipitation is controlled both by the location of source and by  
85 the geomagnetic field configuration. In the present study, we analyze the configuration of the outer  
86 magnetosphere by using observations of energetic electrons from ORB. At low heights, the ORB  
87 electrons are observed at middle to high latitudes adjacent to the region of auroral precipitations  
88 (Lam et al., 2010). Here we use experimental data on energetic electrons measured by several  
89 low-earth orbit (LEO) polar orbiting satellites during the time period from 1998 to 2016. The  
90 method of analysis is described in section 2. The results are presented and discussed in sections 3  
91 and 4, respectively. Section 5 is conclusions.

92

## 93 **2. Method**

94 Energetic electrons in energy ranges  $>30$  keV,  $>100$  keV and  $>300$  keV are measured at LEO by  
95 the Medium Energy Proton and Electron Detector (MEPED) instruments on board the  
96 NOAA/Polar-orbiting Operational Environmental Satellite (POES) satellites (Evans and Greer,  
97 2004; Asikainen and Mursula 2013). Six POES satellites NOAA-16, NOAA-17, NOAA-18,  
98 NOAA-19, METOP-01 and METOP-02 (hereafter, P6, P7, P8, P9, P1 and P2, respectively) have  
99 Sun-synchronous orbits at altitudes of  $\sim 800$ - $850$  km in different local time sectors. Different POES  
100 satellites were operating during different years as shown in Table 2.

101 The outer magnetosphere and ORB are very dynamic regions, which are directly controlled by  
102 highly variable solar wind plasma streams and interplanetary magnetic field (IMF). As a result, the  
103 location of ORB and its high-latitude projection to the heights of LEO vary substantially (e.g.  
104 Dmitriev et al., 2010; Rodger et al., 2010). Namely, a strong local time variation is related to the  
105 global day-night asymmetry of the magnetosphere such that ORB is observed at higher latitudes  
106 during daytime. Variation of geomagnetic tilt angle also causes a change of the ORB latitudinal  
107 location. Interplanetary and geomagnetic disturbances result in a prominent equatorward shift of  
108 ORB.

109 In order to eliminate the disturbing factors, we consider so-called quiet days. Figure 1

110 demonstrates an example of geomagnetic conditions and measurements of the solar wind plasma  
111 and IMF acquired from Wind upstream monitor during quiet day on 23 June 2006. At that day, the  
112 solar wind velocity was slow ( $\sim 310$  km/s), solar wind dynamic pressure was slightly varying about  
113  $\sim 1.6$  nPa, IMF had northward orientation that resulted in very quiet geomagnetic activity ( $AE <$   
114  $100$  nT,  $Dst \sim 0$  nT).

115 The list of quiet days selected in the time interval from 2001 to 2018 is presented in Table 2. The  
116 solar wind data were acquired from Wind upstream monitor. The selection of quiet days was based  
117 on the following criteria:

118 1. The  $Dst$  variation was close to 0 and  $AE$  index was smaller than 200 nT, i.e. the geomagnetic  
119 activity was very weak.

120 2. The solar wind dynamic pressure  $Pd$  varied slightly around its average values falling in the  
121 range from  $\sim 1$  to 2 nPa.

122 3. The solar wind speed was  $< 400$  km/s and the amplitudes of negative IMF  $Bz$  were weak ( $< 4$  nT).

123 Note that fast solar wind with the speed of  $V > 400$  km/s initiates the Kelvin-Helmholtz instability  
124 at the magnetopause and intensification of wave activity in the outer magnetosphere that results in  
125 effective acceleration and outward transport of the ORB electrons (Engebretson et al., 1998;  
126 Horne et al., 2007; Reeves et al., 2013).

127 4. The quiet days were chosen as long as possible after magnetic storms such that storm-time  
128 disturbances of ORB had time to relax. Usually, the quiet days occurred after long-lasting recovery  
129 phase of recurrent magnetic storms (Suvorova et al., 2013).

130 The local time variation of ORB latitudinal location was minimized by a choice of narrow LT  
131 sector around noon (from 10 to 14 LT). We chose quiet days around June solstice in order to  
132 minimize the tilt angle variations. Note that June of 2003 and 2007 was very disturbed and there  
133 were no quiet days selected for those years.

134 Figure 2 shows an example of NOAA/POES measurements of energetic electrons in geographic  
135 coordinates during the quiet days on 23 June 2006 and 3 June 2016. The geographic maps are  
136 composed from data retrieved over multiple orbits of the NOAA/POES satellites in the noon sector  
137 ( $12 \pm 2$  LT). For each bin of  $3^\circ$  in longitudes and  $0.5^\circ$  in latitudes, we calculate the average flux of

138 electrons measured by the  $90^\circ$  detector of the MEPED instrument. At high latitudes, the detector  
139 observes trapped electrons with pitch angles close to  $90^\circ$ , i.e. near the mirror points.

140 The limitation of ORB measurements at given local time is originated from fixed local time of  
141 POES satellites at sun synchronous orbits. As one can see in Figure 2 and Table 2, large statistics  
142 in the Northern hemisphere can be obtained from a number of POES satellites moving in 2-hour  
143 vicinity of local noon around the June solstice. ORB can be easily identified as a wide belt of  
144 intense electron fluxes at high latitudes. At middle latitudes, in longitudinal ranges from  $\sim 90^\circ\text{E}$  to  
145  $180^\circ\text{E}$  in the Eastern Hemisphere and from  $\sim 80^\circ\text{W}$  to  $180^\circ\text{W}$  in the Western Hemisphere, one can  
146 also see intense electron fluxes from the inner electron belt and a slot region between the outer and  
147 inner belts. The slot region is almost vanished in the maps of subrelativistic electrons with energies  
148  $>300$  keV. Qualitative examination of the ORB location in Figure 2 reveals that in the Eastern  
149 Hemisphere, the outer electron belt in 2016 is located few degrees lower in latitudes than that in  
150 the year 2006. Most obvious difference can be found for the slot region, which corresponds to the  
151 low-latitude boundary of ORB.

152 For quantitative determination of the ORB latitudinal displacement, we analyze electron fluxes in  
153  $4^\circ$  vicinities of three longitudes:  $80^\circ\text{W}$  (American sector),  $0^\circ\text{E}$  (European sector) and  $100^\circ\text{E}$   
154 (Siberian sector). Figure 3 shows latitudinal profiles of  $>30$  keV;  $>100$  keV and  $>300$  keV electron  
155 fluxes with pitch angles of  $\sim 90^\circ$  observed by the NOAA/POES satellites around given longitudes  
156 during the quiet days in the years from 2001 to 2018. One can easily identify the maximum of  
157 ORB at high latitudes and the slot region at middle latitudes for the American and Siberian sectors.  
158 Above the Europe, the slot region is not detected at altitudes of the NOAA/POES orbit.

159 It should be noted that after the year 2014, the experimental data on electrons detected by POES is  
160 presented in a different format such that the energy channels of electrons are different from those  
161 presented earlier:  $>40$  keV instead of  $>30$  keV,  $>130$  keV instead of  $>100$  keV, and  $>290$  keV  
162 instead of  $>300$  keV. Because of that cross-calibration of the electron detectors is difficult. On the  
163 other hand, the difference in energies is not very large and, thus, it should not affect strongly the  
164 location of ORB. At least the differences are much smaller than the steps between the channels.  
165 Therefore, the complex analysis of all three electron channels allows minimization of this effect.

### 167 3. Results

168 In Figure 3, the ORB maxima in the American, European and Siberian sectors can be found in the  
169 ranges of latitudes from  $50^\circ$  to  $58^\circ$ , from  $64^\circ$  to  $70^\circ$  and from  $62^\circ$  to  $74^\circ$ , respectively. We  
170 determine geographic latitude of the maxima for each year with the accuracy of  $0.5^\circ$  to  $1^\circ$ . One can  
171 see that the location as well as the intensity of the maximum varies from year to year. The intensity  
172 is minimal during the solar minimum in 2009. The fluxes of  $>300$  keV electrons (Figure 3c) were  
173 very weak such as determination of the ORB was very difficult. In addition, the ORB maximum  
174 above Siberia could not be determined in 2011 because of limited statistics.

175 Qualitatively, the position of ORB maximum above Siberia is more close to  $70^\circ$  and  $65^\circ$ ,  
176 respectively, in 2001 - 2010 and in 2012 – 2018. Above the Europe and North America, variation  
177 of the ORB location is more random. The fluxes of  $>30$  keV electrons in the outer region of ORB  
178 are very dynamic because of strong contribution from the auroral population. The latter produced  
179 additional maxima at latitudes above  $70^\circ$  and  $55^\circ$ , respectively, in the European-Siberian and  
180 American sectors. The additional maxima were very intense in the years 2008, 2010 and 2017 that  
181 made difficult to determine the actual location of the ORB. In those cases, we chose the maximum  
182 located at lower latitude. This choice gives a good agreement with the ORB maximum location for  
183 the  $>100$  keV electrons and especially subrelativistic  $>300$  keV electrons, which are practically  
184 free from the auroral contamination.

185 In Figure 3, one can clearly see the slot region between the outer and inner electron belts in the  
186 latitudinal ranges  $45^\circ - 50^\circ$  and  $45^\circ - 50^\circ$  above North America and Siberia, respectively. This  
187 structure can be well identified and numerically determined, excepting  $>300$  keV electrons. Hence,  
188 we determine the first high-latitude point of electron flux enhancements as the low-latitude edge of  
189 ORB. Geographic latitude of this point is determined for each year with the accuracy varying from  
190  $0.5^\circ$  to  $1^\circ$ . In Figure 3, one can find that the latitude of the ORB edge above Siberia decreases with  
191 years from  $\sim 65^\circ$  to  $60^\circ$  for all energy range of electrons. The change of ORB location above the  
192 Europe and North America is not so obvious.

193 Figures 4 and Figure 5 show long-term variations in the location of ORB and corresponding

194 predictions of the IGRF-12 model during 17 years from 2001 to 2018. As one can see, the ORB  
195 maximum and inner edge of >30 keV electrons are usually located at higher latitudes than those of  
196 >100 keV electrons, and the ORB of subrelativistic >300 keV electrons is located at lowest  
197 latitudes. Note that the location of ORB maximum for >30 keV electrons is scattered significantly  
198 and it is different from those for the more energetic electrons because of substantial contamination  
199 from the auroral electrons. In contrast, the ORB maxima and inner edge of >100 keV and >300  
200 keV electrons demonstrate very similar dynamics.

201 As can be seen in Figures 4 and 5, the location of ORB manifests the well-known solar cycle  
202 variation: the latitudes of ORB maximum and inner edge have a tendency to be highest around  
203 solar minimum in 2008 – 2010 and lowest during solar maxima in the years 2001 and 2012 – 2013.  
204 However, during the declining phase of the current solar cycle (the years 2016 – 2018), the  
205 latitudes of ORB maximum and inner edge increased only slightly or even decreased above North  
206 America and especially above Siberia. Unfortunately, there is no any model of the ORB location  
207 variation with the solar cycle because the driving mechanisms are not well established.

208 As a first approach, the variations of ORB location with years are considered as random and can be  
209 fitted by a linear function (indicated by dashed strait lines in Figures 4 and 5):

$$210 \quad \lambda = a * \text{year} + b, (1)$$

211 where  $\lambda$  is the latitude of maximum or inner edge of ORB. The slope  $a$ , parameter  $b$  and their  
212 standard errors are calculated from a linear regression for various longitudinal regions and various  
213 energies of electrons. The results are presented in Tables 3 and 4 for the ORB maximum and the  
214 inner edge, respectively.

215 The linear fits are compared with geomagnetic field trends predicted by the IGRF model in  
216 different regions. The trends were calculated in the following manner. First, we took a point with  
217 given geographic coordinates and calculated its magnetic coordinates for the quiet day on 29 June  
218 2001 using the IGRF model of epoch 2000. Namely, for the ORB maximum, we took points (70°N,  
219 80°W), (66°N, 0°E) and (54°N, 100°E), respectively, for the American, European and Siberian  
220 sectors and calculated their geomagnetic coordinates (64.12°N, 11.44°W), (67.05°N, 95.66°E) and  
221 (59.5°N, 174.3°E), respectively. For the inner edge of ORB, we took, respectively, (46.5°N, 80°W),



222 (59°N, 0°E) and (63°N, 100°E), with corresponding geomagnetic coordinates (56.62°N, 10.61°W)  
223 (60.59°N, 89.34°E) and (52.47°N, 173.7°E). Then we supposed that the geomagnetic coordinates  
224 of the points do not change with time and we used them to calculate geographic coordinates from  
225 the IGRF-12 model for corresponding quiet days listed in Table 2. The geographic coordinates of a  
226 point with given magnetic coordinates should be changed with time because of long-term variation  
227 of the geomagnetic field. As one can see in Figures 4 and 5, the long-term variation is almost linear  
228 function of the year and, hence, this variation can be easily compared with the linear fits of the  
229 ORB location.

230 In the American sector (see Figure 4a), the latitude of ORB maximum demonstrates a little  
231 decrease of about 1° while the IGRF-12 model predicts an increase of ~1°. The decrease results  
232 from relatively low latitudes, where the ORB maximum is located from 2013 to 2018. The location  
233 of inner edge of ORB in the American sector (see Figure 5a) does not practically change within the  
234 experimental uncertainty of ~1°. Note that in both cases, the slope  $a$  has very large error (see  
235 Tables 3 and 4). The errors are comparable or even exceed the values of slope. Hence, from the  
236 statistical consideration one can conclude that the model prediction does not contradict to the  
237 observations.

238 In the European sector (Figures 4b and 5b), the IGRF-12 model predicts very small change of 0.3°  
239 in the ORB location that is in good agreement with the ORB maximum dynamics. The location of  
240 ORB inner edge for electrons with energies >30 keV and >100 keV demonstrates an increase of  
241 ~3°. However, the slope of increase is determined with a substantial error of up to 50% (see Table  
242 4) that produces an increase by only ~1.5°. In addition, the >300 keV electrons follow the model  
243 and do not exhibit any prominent trend. Hence in the European sector, the IGRF model predicts the  
244 ORB dynamics with sufficient accuracy.

245 in the Siberian sector, the IGRF model predicts ~1° decrease in latitude of the ORB maximum and  
246 inner edge as shown in Figures 4c and 5c. From the POES observations, we find that the ORB  
247 maximum is displaced to lower latitudes by at least ~3° in all electron energy channels: from ~69°  
248 to ~66° for >300 keV electrons, from ~70° to 66° for >100 keV electrons and from ~71° to 67° for  
249 >30 keV electrons (see Figure 4c). The difference is related to very low latitudes (~67° and less) of

250 the ORB maximum during solar maximum and on the declining phase of the current 24th solar  
251 cycle in the years 2012 - 2013 and 2016 - 2018, respectively. In the solar maximum and on the  
252 declining phase of the previous 23rd solar cycle (the years 2001 and 2004 - 2006), the ORB  
253 maximum was located at higher latitudes (above  $67^\circ$ ). Note that the error in determination of the  
254 slope  $a$  is  $\sim 50\%$  as shown in Table 3. Hence statistically, the decrease of latitude might be two  
255 times smaller, i.e.  $\sim 1.5^\circ$  to  $2^\circ$ . This decrease is slightly larger than  $1^\circ$  of the model prediction,  
256 within  $0.5^\circ$  to  $1^\circ$  statistical uncertainty in determination of latitude.

257 Similar pattern can be found for the inner edge of ORB in the Siberian sector (see Figure 5c).  
258 Namely, the IGRF model predicts a decrease of  $\sim 1^\circ$ . The inner edge was shifted toward lower  
259 latitudes by  $\sim 3^\circ$ ,  $\sim 2^\circ$  and  $\sim 1^\circ$ , respectively, for  $>30$  keV,  $>100$  keV and  $>300$  keV electrons. From  
260 Table 4, one can see that the slope  $a$  is calculated with errors of  $\sim 30\%$  and  $\sim 20\%$ , respectively, for  
261  $>30$  keV and  $>100$  keV electrons. It means that the decrease in latitude might be  $\sim 2^\circ$  (instead of  
262  $\sim 3^\circ$ ) and  $\sim 1.5^\circ$  (instead of  $\sim 2^\circ$ ), respectively. These values are again larger than  $1^\circ$  of the model  
263 prediction. Hence, there is a tendency that the change in the latitudinal location of ORB maximum  
264 is underestimated by the model. This fact indicates that during 17 years from 2001 to 2018, ORB is  
265 abnormally displaced toward the lower latitudes in the Siberian sector.

266 It is interesting to point out the year 2017, when the maximum and inner edge of ORB shifted to  
267 very low latitudes of  $62^\circ$  and  $\sim 59^\circ$  respectively. The shift was observed during two quiet days on 9  
268 and 10 June 2017. Similar pattern of displacement can be found on the declining phase of the  
269 previous 23rd solar cycle in the year 2005, when the ORB suddenly shifted equatorward by more  
270 than  $\sim 2^\circ$ . Note that if we exclude the year 2017 from the linear fitting then the results are not  
271 practically changed because ORB is located at relatively low latitudes during the years 2012 to  
272 2018.

273

#### 274 **4. Discussion**

275 We have found up to  $4^\circ$  equatorward displacement of the ORB in the Siberian sector. The  
276 displacement is larger than that predicted by the IGRF-12 model. The difference is statistically  
277 significant. It might result both from a change of the geomagnetic field and from changes of

278 driving parameters such as geomagnetic activity, the tilt angle, IMF  $B_z$  and solar wind dynamic  
279 pressure. It is well known that those parameters affect the latitudinal location of domains in the  
280 outer magnetosphere (e.g. Kuznetsov et al., 1993; Newell et al., 2006). The effect of geomagnetic  
281 activity was eliminated by the choice of quiet days. The other drivers are considered below.

282 The tilt angle in the noon region at given longitude ( $80^\circ\text{W}$ ,  $0^\circ\text{E}$  and  $100^\circ\text{E}$ ) varies a little ( $<2^\circ$ )  
283 during the June month. The change of local time in 2-hour vicinity of noon produces  $\sim 5^\circ$  variation  
284 of the tilt angle. The tilt angle variations of a few degrees result in a tiny change of  $\sim 0.1^\circ$  in the  
285 ORB latitude (Newell et al., 2006; Dmitriev et al., 2010). Hence, we can neglect the effect of tilt  
286 angle.

287 The effect of solar wind parameters, including IMF  $B_z$  and dynamic pressure ( $P_d$ ), to the outer  
288 magnetosphere domains was comprehensively investigated by Newell et al. (2006). Namely it was  
289 shown a dependence of the cusp low-latitude boundary on the IMF  $B_z$  such that  $B_z = -4$  nT results  
290 in less than  $0.5^\circ$  equatorward shift. The cusp location can be considered as a proxy of the ORB  
291 boundary. Similar situation can be found with the solar wind dynamic pressure: a change of  $P_d$   
292 from 1 to 2 nPa results in  $\sim 0.2^\circ$  decrease in the latitude of the ORB boundary. Hence, the effects of  
293 both  $P_d$  and IMF  $B_z$  are several times weaker than the difference of  $3^\circ$ .

294 Another possible effect is the solar cycle variation. It was well established that during solar  
295 maxima, the ORB is located at lower latitudes than during solar minimum. Variations of the ORB  
296 location from cycle to cycle are not investigated yet. We can only speculate that lower solar  
297 activity (solar minimum) results in an increase of the ORB latitudes. In Figure 3, one can see that  
298 the intensities of electrons are weaker after the beginning of the 24th solar maximum in 2012 in  
299 comparison with the 23rd solar cycle, which was stronger than the 24th one. Following this logic,  
300 the ORB should be located at relatively higher latitudes during the weak 24th solar cycle than  
301 during the strong 23rd solar cycle. However, we have found totally opposite effect: ORB over  
302 Siberia is located at lower latitudes after 2012.

303 From the above, we can conclude that the difference between the observations and predictions can  
304 be rather originated from anomalous dynamics of the geomagnetic field. This idea is supported by  
305 the observations of ORB location over the Europe and North America, where the ORB

306 displacement is well predicted by the IGRF-12 model. An additional support can be found from  
307 results of long-term magnetic observations in Siberia where significant anomalies of the main  
308 geomagnetic field have been revealed in the 80°-130° longitudinal range (Gvishiani et al., 2014).  
309 Namely, the IGRF-12 model predicted the magnetic field up to 300 nT stronger than that measured  
310 by ground based magnetic stations that was close to 0.5% of the total magnetic field in this region.  
311 For the geodipole, stronger magnetic field corresponds to higher latitudes.

312 In Figures 4c and 5c, one can see that the decrease of ORB latitude in the Siberian sector is most  
313 prominent after 2012. On the other hand in the years 2012 –2013, a sudden change was found in  
314 the acceleration of secular variation in the geomagnetic field (Finlay et al., 2015). Analyzing time  
315 interval from 1999 to 2015, Finlay et al. (2015) revealed 3 pulses in time evolution of the mean  
316 square secular acceleration power: in 2006, in 2009 and in 2012 – 2013. Chulliat et al. (2015)  
317 attribute these pulses, or so-called sharp geomagnetic "jerks", to magnetic field variations  
318 originating in the Earth's core.

319 We can assume that the abnormal ORB displacement might be related to the geomagnetic jerk  
320 occurred in 2012 – 2013. The several degrees equatorward displacement of ORB in the Siberian  
321 sector indicates an equatorward shifting of all domains in the outer magnetosphere, including the  
322 region of auroral precipitations. Apparently, the shifting contributes to the increase in occurrence  
323 rate of the mid-latitude auroras in Siberia and, perhaps, in entire Russia. In addition, Finlay et al.  
324 (2015) expect that the next jerk might occur around 2016. We do not have any reports about the  
325 recent jerks yet. But very strong decrease of the ORB latitude observed in 2017 might indicate the  
326 sudden change in the geomagnetic field.

327

## 328 **5. Conclusions**

329 NOAA/POES observations of electrons with energies of few tens and hundreds of keV allowed  
330 revealing and measure a latitudinal displacement of the outer radiation belt during last 18 years.  
331 The displacement corresponds qualitatively to the change of geomagnetic field predicted by the  
332 IGRF-12 model. However in the Siberian sector, the model has a tendency to underestimate the  
333 equatorward shift of ORB. ~~However, numerically the equatorward shift in the Siberian sector was~~

334 ~~found more than  $\sim 2^\circ$  larger than that predicted by the model.~~ The shift became prominent after  
335 2012 that might be related to the geomagnetic jerk occurred in 2012 – 2013. The increase in the  
336 occurrence rate of mid-latitude auroras in the Eastern Hemisphere can be explained, at least  
337 partially, by the equatorward displacement of the high-latitude projection of the outer  
338 magnetosphere domains.

339  
340 **Acknowledgments** The authors thank a team of NOAA's Polar Orbiting Environmental Satellites  
341 for providing experimental data about energetic particles, the CDAWEB for providing the Wind  
342 solar wind data, and Kyoto World Data Center for Geomagnetism  
343 (<http://wdc.kugi.kyotou.ac.jp/index.html>) for providing the geomagnetic indices and computation  
344 of the IGRF12 model. The work was supported by grant MOST-106-2111-M-008-015-, R&D  
345 foundation from National Central University and partially by grant  
346 NSC103-2923-M-006-002-MY3/14-05-92002HHC\_a of Taiwan - Russia Research Cooperation.  
347

348 **References**

- 349 Asikainen, T., and Mursula, K.: Correcting the NOAA/MEPED energetic electron fluxes for  
350 detector efficiency and proton contamination, *J. Geophys. Res. Space Physics*, 118,  
351 doi:10.1002/jgra.50584, 2013.
- 352 Baker, D. N., Jaynes, A. N., Kanekal, S. G., Foster, J. C., Erickson, P. J., Fennell, J. F., Blake, J. B.,  
353 Zhao, H., Li, X., Elkington, S. R., Henderson, M. G., Reeves, G. D., Spence, H. E., Kletzing, C.  
354 A., and Wygant, J. R.: Highly relativistic radiation belt electron acceleration, transport, and loss:  
355 Large solar storm events of March and June 2015, *J. Geophys. Res. Space Physics*, 121,  
356 6647-6660, doi:10.1002/2016JA022502, 2016.
- 357 Case, N. A., MacDonald, E. A., and Patel, K. G.: Aurorasaurus and the St Patrick's Day storm,  
358 *Astronomy & Geophysics* 56(3), 13-14. DOI: 10.1093/astrogeo/atv089, 2015.
- 359 Chulliat, A., Hulot, G., and Newitt, L. R.: Magnetic flux expulsion from the core as a possible  
360 cause of the unusually large acceleration of the north magnetic pole during the 1990s, *J.*  
361 *Geophys. Res.*, 115, B07101, doi:10.1029/2009JB007143, 2010.
- 362 Chulliat A., Alken, P., and Maus, S.: Fast equatorial waves propagating at the top of the Earth's  
363 core. *Geophys Res Lett.*, 42(9), 3321-3329, doi:10.1002/2015GL064067, 2015.
- 364 Cresswell-Moorcock, K., Rodger, C. J., Kero, A., Collier, A. B., Clilverd, M. A., Häggström, I.,  
365 and Pitkänen, T.: A reexamination of latitudinal limits of substorm-produced energetic electron  
366 precipitation, *J. Geophys. Res. Space Physics*, 118, 6694-6705, doi:10.1002/jgra.50598, 2013.
- 367 Dmitriev, A. V., Jayachandran, P. T., and Tsai, L.-C.: Elliptical model of cutoff boundaries for the  
368 solar energetic particles measured by POES satellites in December 2006, *J. Geophys. Res.*, 115,

369 A12244, doi:10.1029/2010JA015380, 2010.

370 Engebretson, M., Glassmeier, K.-H., Stellmacher, M., Hughes, W. J., and Luhr, H.: The  
371 dependence of high-latitude Pc5 wave power on solar wind velocity and on the phase of  
372 high-speed solar wind streams, *J. Geophys. Res.*, 103, 26,271-26,283, doi:10.1029/97JA03143,  
373 1998.

374 Evans, D. S., and Greer, M. S.: Polar Orbiting Environmental Satellite Space Environment Monitor:  
375 2. Instrument Descriptions and Archive Data Documentation, Tech. Memo. Version 1.4, NOAA  
376 Space Environ. Lab., Boulder, Colo., 2004.

377 Finlay, C. C., Aubert, J., and Gillet, N.: Gyre-driven decay of the Earth's magnetic dipole, *Nat.*  
378 *Commun*, 7:10422, 1 - 8, doi: 10.1038/ncomms10422, 2016.

379 Gvishiani, A., Lukianova, R., Soloviev, A., Khokhlov, A.: Survey of Geomagnetic Observations  
380 Made in the Northern Sector of Russia and New Methods for Analysing Them, *Surv.*  
381 *Geophys.*,35, 1123-1154, DOI 10.1007/s10712-014-9297-8, 2014.

382 Horne, R. B., Thorne, R. M., Glauert, S. A., Meredith, N. P., Pokhotelov, D., and Santolik, O.:  
383 Electron acceleration in the Van Allen radiation belts by fast magnetosonic waves, *Geophys.*  
384 *Res. Lett.*, 34, L17107, doi:10.1029/2007GL030267, 2007.

385 Kataoka, R., Shiota, D., Kilpua, E., and Keika, K.: Pileup accident hypothesis of magnetic storm  
386 on 17 March 2015, *Geophys. Res. Lett.*, 42, 5155-5161, doi:10.1002/2015GL064816, 2015.

387 Kuznetsov, S.N., Suvorova, A.V., and Tolstaya, E.D.: Relationship of the cleft latitude to  
388 interplanetary parameters and DST variations, *Cosmic Research*, 31(4), 409-415 (Translated  
389 from *Kosmicheskie Issledovaniya*), 1993.

390 Lam, M. M., Horne, R. B., Meredith, N. P., Glauert, S. A., Moffat-Griffin, T., and Green, J. C.:  
391 Origin of energetic electron precipitation >30 keV into the atmosphere, *J. Geophys. Res.*, 115,  
392 A00F08, doi:10.1029/2009JA014619, 2010.

393 Li, X., Baker, D. N., Kanekal, S. G., Looper, M., and Temerin, M.: Long term measurements of  
394 radiation belts by SAMPEX and their variations, *Geophys. Res. Lett.*, 28(20), 3827-3830, DOI:  
395 10.1029/2001GL013586, 2001.

396 MacDonald, E. A., Case, N. A., Clayton, J. H., Hall, M. K., Heavner, M., Lalone, N., Patel, K. G.,  
397 and Tapia, A.: Aurorasaurus: A citizen science platform for viewing and reporting the aurora,  
398 *Space Weather*, 13, doi:10.1002/2015SW001214, 2015.

399 Mikhalev, A. V., Beletsky, A. B., Kostyleva, N. V., and Chernigovskaya, M. A.: Midlatitude  
400 Auroras in the South of Eastern Siberia during Strong Geomagnetic Storms on October 29-31,  
401 2003 and November 20-21, 2003, *Cosmic Research*, 42(6), 591-596 (Translated from  
402 *Kosmicheskie Issledovaniya*, 42(6), 616-621), 2004.

403 Miyoshi, Y. and Kataoka, R.: Solar cycle variations of outer radiation belt and its relationship to  
404 solar wind structure dependences, *Journal of Atmospheric and Solar-Terrestrial Physics*, 73(10),  
405 77-87, doi:10.1016/j.jastp.2010.09.031, 2011.

406 Miyoshi, Y. S., Jordanova, V. K., Morioka, A., and Evans, D. S.: Solar cycle variations of the  
407 electron radiation belts: Observations and radial diffusion simulation, *Space Weather*, 2,  
408 S10S02, doi:10.1029/2004SW000070, 2004.

409 Newell, P. T., Sotirelis, T., Liou, K., Meng, C.-I., and Rich, F. J.: Cusp latitude and the optimal  
410 solar wind coupling function, *J. Geophys. Res.*, 111, A09207, doi:10.1029/2006JA011731,



411 2006.

412 Newell, P. T., Sotirelis, T., and Wing, S.: Seasonal variations in diffuse, monoenergetic, and  
413 broadband aurora, *J. Geophys. Res.*, 115, A03216, doi:10.1029/2009JA014805, 2010.

414 Reeves, G. D., Spence, H. E., Henderson, M. G., Morley, S. K., Friedel, R. H. W., Funsten, H. O.,  
415 Baker, D. N., Kanekal, S. G., Blake, J. B., Fennell, J. F., Claudepierre, S. G., Thorne, R. M.,  
416 Turner, D. L., Kletzing, C. A., Kurth, W. S., Larsen, B. A., and Niehof, J. T.: Electron  
417 Acceleration in the Heart of the Van Allen Radiation Belts, *Science*, 341(6149), 991-994, DOI:  
418 10.1126/science.1237743, 2013.

419 Roble, R. G., and Ridley, E. C.: An auroral model for the NCAR thermospheric general circulation  
420 model (TGCM), *Ann. Geophys.*, 5, 369-382, 1987.

421 Rodger, C. J., Clilverd, M. A., Green, J. C., and Lam, M. M.: Use of POES SEM-2 observations to  
422 examine radiation belt dynamics and energetic electron precipitation into the atmosphere, *J.*  
423 *Geophys. Res.*, 115, A04202, doi:10.1029/2008JA014023, 2010.

424 Shen, X.-C., Hudson, M. K., Jaynes, A., Shi, Q., Tian, A., Claudepierre, S., Qin, M.-R., Zong, Q.-G.,  
425 and Sun, W.-J.: Statistical study of the storm time radiation belt evolution during Van Allen  
426 Probes era: CME- versus CIR-driven storms, *J. Geophys. Res. Space Physics*, 122, 8327.8339,  
427 doi:10.1002/2017JA024100, 2017.

428 Shiokawa, K., Ogawa, T., and Kamide, Y.: Low-latitude auroras observed in Japan: 1999–2004, *J.*  
429 *Geophys. Res.*, 110, A05202, doi:10.1029/2004JA010706, 2005.

430 Smith, A. R. A., Beggan, C. D., Macmillan, S., and Whaler, K. A.: Climatology of the auroral  
431 electrojets derived from the along-track gradient of magnetic field intensity measured by

432 POGO, Magsat, CHAMP, and Swarm. Space Weather, 15,  
433 <https://doi.org/10.1002/2017SW001675>, 2017.

434 Suvorova, A. V., Dmitriev, A. V., Tsai, L.-C., Kunitsyn, V. E., Andreeva, E. S., Nesterov, I. A., and  
435 Lazutin, L. L.: TEC evidence for near-equatorial energy deposition by 30 keV electrons in the  
436 topside ionosphere, J. Geophys. Res. Space Physics, 118, 4672-4695, doi:10.1002/jgra.50439,  
437 2013.

438 Thebault E. et al.: International Geomagnetic Reference Field: the 12th generation, Earth, Planets  
439 and Space, 67:79, 2 – 19, doi 10.1186/s40623-015-0228-9, 2015.

440 Vázquez, M., Vaquero, J. M., Gallego, M. C., Roca Cortés, T., Pallé, P. L.: Long-Term Trends and  
441 Gleissberg Cycles in Aurora Borealis Records (1600 - 2015), Solar Phys 291, 613-642, DOI  
442 10.1007/s11207-016-0849-6, 2016.

443

444 **Table 1.** Observations of discrete aurora in Russia in the years 2015 to 2016

| Date                | min Dst,<br>nT | City           | Geomagnetic<br>location | Reference |
|---------------------|----------------|----------------|-------------------------|-----------|
| 2015 March 17-18    | -220           | Moscow         | 51°16N 122°06E          | Ref1      |
| 2015 June 22-23     | -200           | Moscow         | 51°16N 122°06E          | Ref2      |
| 2015 August 16-17   | -84            | St. Petersburg | 56°23N 117°36E          | Ref3      |
| 2015 October 7-8    | -120           | St. Petersburg | 56°23N 117°36E          | Ref4      |
| 2016 February 17-18 | -50            | St. Petersburg | 56°24N 117°37E          | Ref5      |
| 2016 April 3-4      | -50            | St. Petersburg | 56°24N 117°37E          | Ref6      |
| 2016 August 24-25   | -80            | St. Petersburg | 56°24N 117°37E          | Ref7      |
| 2017 September 7-8  | -124           | Novosibirsk    | 45°56N 160°07E          | Ref8      |
| 2017 November 7-8   | -74            | St. Petersburg | 56°25N 117°38E          | Ref9      |

445 Ref1 - [www.dp.ru/a/2015/03/18/Severnoe\\_sijanie\\_uvideli\\_zh/](http://www.dp.ru/a/2015/03/18/Severnoe_sijanie_uvideli_zh/)446 Ref2 - [www.dp.ru/a/2015/06/23/Severnoe\\_sijanie\\_uvideli\\_v/](http://www.dp.ru/a/2015/06/23/Severnoe_sijanie_uvideli_v/)447 Ref3 - <http://47news.ru/articles/92419/>448 Ref4 - [www.dp.ru/a/2015/10/08/Severnoe\\_sijanie\\_v\\_Peterbu/](http://www.dp.ru/a/2015/10/08/Severnoe_sijanie_v_Peterbu/)449 Ref5 - [www.fontanka.ru/2016/02/17/058/](http://www.fontanka.ru/2016/02/17/058/)450 Ref6 - [www.dp.ru/a/2016/04/03/ZHiteli\\_Peterburga\\_deljatsja/](http://www.dp.ru/a/2016/04/03/ZHiteli_Peterburga_deljatsja/)451 Ref7 - [www.fontanka.ru/2016/08/24/035/](http://www.fontanka.ru/2016/08/24/035/) and [www.topnews.ru/news\\_id\\_92986.html](http://www.topnews.ru/news_id_92986.html)452 Ref8 - <http://www.ntv.ru/video/1515160/>453 Ref9 - <https://www.fontanka.ru/2017/11/07/134/>

454

455

456

**Table 2.** List of quiet days in June selected for POES observations of the outer radiation belt.

| Year | Day in June | Start UT | Duration, hours | V* km/s | Pd** nPa        | Bz <sub>min</sub> <sup>§</sup> nT | POES Satellites <sup>#</sup> |
|------|-------------|----------|-----------------|---------|-----------------|-----------------------------------|------------------------------|
| 2001 | 29          | 0        | 24              | 350     | 1.6 (1.0 – 3.2) | 0.6 (-4)                          | P6                           |
| 2002 | 28          | 0        | 24              | 340     | 1.2 (0.8 – 1.8) | 2.2 (-3)                          | P6                           |
| 2004 | 24          | 12       | 24              | 330     | 1.1 (0.5 – 2.5) | 1.2 (-2)                          | P6, P7                       |
| 2005 | 21          | 0        | 18              | 350     | 0.9 (0.5 – 2.0) | 3.1 (-4)                          | P6, P7, P8                   |
| 2006 | 23          | 0        | 24              | 310     | 1.6 (1.1 – 2.3) | 3.4 (-1)                          | P6, P7, P8                   |
| 2008 | 13          | 0        | 24              | 310     | 1.5 (0.8 – 1.9) | 1.8 (-0.8)                        | P2, P7, P8                   |
| 2009 | 17          | 0        | 24              | 300     | 1.1 (0.5 – 1.7) | 1.9 (-3)                          | P2, P7, P8, P9               |
| 2010 | 12          | 0        | 24              | 350     | 1.1 (0.6 – 2.4) | 0.2 (-2)                          | P2, P7, P8, P9               |
| 2011 | 28          | 6        | 24              | 390     | 0.8 (0.5 – 1.7) | 1.8 (-2)                          | P2, P6, P8, P9               |
| 2012 | 15          | 0        | 24              | 320     | 0.8 (0.5 – 1.3) | 0.0 (-3)                          | P2, P6, P8, P9               |
| 2013 | 16          | 0        | 24              | 330     | 0.9 (0.6 - 1.5) | 1.0 (-3)                          | P2, P6, P8, P9               |
| 2014 | 1           | 0        | 36              | 300     | 1.7 (1.1 – 4.0) | 1.5 (-4)                          | P1, P2, P9                   |
| 2015 | 4           | 0        | 24              | 280     | 1.0 (0.7 – 1.7) | 0.9 (-3)                          | P1, P2, P9                   |
| 2016 | 3           | 0        | 24              | 300     | 1.0 (0.7 – 1.4) | -0.3 (-3)                         | P1, P2, P9                   |
| 2017 | 9           | 6        | 24              | 310     | 1.9 (1.0 – 2.6) | -1.3 (-4)                         | P1, P2, P9                   |
| 2018 | 12          | 8        | 24              | 300     | 1.3 (0.9 – 2.0) | 0.0 (-4)                          | P1, P2, P9                   |

457

\*Daily average of the solar wind velocity

458

\*\*Daily average of the solar wind dynamic pressure and its minimum and maximum in brackets

459

§Daily average Bz component of the interplanetary magnetic field and Bz minimum in brackets

460

#POES satellites observed the outer radiation belt

461

462 **Table 3.** Coefficients of the best linear fit of the latitudinal change of the ORB maximum location  
 463 with years for various longitudes and energy of electrons

| Longitude, deg | Energy, keV | a, deg/year        | b, deg |
|----------------|-------------|--------------------|--------|
| -80            | >30         | $-0.153 \pm 0.112$ | 362    |
| -80            | >100        | $-0.069 \pm 0.097$ | 192    |
| -80            | >300        | $-0.057 \pm 0.084$ | 167    |
| 0              | >30         | $0.021 \pm 0.089$  | 24     |
| 0              | >100        | $-0.032 \pm 0.063$ | 129    |
| 0              | >300        | $-0.027 \pm 0.042$ | 119    |
| 100            | >30         | $-0.265 \pm 0.119$ | 602    |
| 100            | >100        | $-0.208 \pm 0.106$ | 486    |
| 100            | >300        | $-0.167 \pm 0.084$ | 403    |

464  
 465  
 466 **Table 4.** Coefficients of the best linear fit of the latitudinal change of the ORB inner edge location  
 467 with years for various longitudes and energy of electrons.

| Longitude, deg | Energy, keV | a, deg/year        | b, deg |
|----------------|-------------|--------------------|--------|
| -80            | >30         | $-0.029 \pm 0.065$ | 106    |
| -80            | >100        | $-0.021 \pm 0.059$ | 89     |
| -80            | >300        | $-0.014 \pm 0.063$ | 73     |
| 0              | >30         | $0.195 \pm 0.107$  | -332   |
| 0              | >100        | $0.241 \pm 0.078$  | -424   |
| 0              | >300        | $0.032 \pm 0.069$  | -4     |
| 100            | >30         | $-0.183 \pm 0.058$ | 432    |
| 100            | >100        | $-0.211 \pm 0.037$ | 487    |
| 100            | >300        | $-0.097 \pm 0.069$ | 257    |

468  
 469

470 **Figure captions**

471  
472 Figure 1. Solar wind and geomagnetic conditions on 22 to 24 June 2006 (from top to bottom):  
473 solar wind bulk velocity  $V$ ; solar wind dynamic pressure  $P_d$ ; interplanetary magnetic field  
474 magnitude  $B$  (blue dotted curve) and  $B_z$  component (black solid curve); auroral electrojet index  
475  $AE$ ; storm-time  $Dst$  index. The day on 23 June (indicated by vertical red dashed lines) is very quite  
476 in the solar wind and geomagnetic parameters.

477  
478 Figure 2. Geographic maps of energetic electron fluxes with energies  $>300$  keV (a,b),  $>100$  keV  
479 (c,d),  $>30$  keV (e,f) and pitch angles of  $\sim 90^\circ$  observed by POES satellites at height of  $\sim 850$  km in 2  
480 hour vicinity of local noon (left column) on 23 June 2006 and (right column) on 2 June 2016. The  
481 solid wide curve indicates the geomagnetic equator. The outer and inner electron belts and a slot  
482 region between them are clearly seen (excepting of  $>300$  keV electrons), respectively, at high and  
483 middle latitudes in the longitudinal range from  $\sim 90^\circ$  E to  $\sim 80^\circ$  W.

484  
485 Figure 3. Latitudinal profiles of electron fluxes with pitch angles of  $\sim 90^\circ$  observed by POES  
486 satellites during quiet days in different years at height of  $\sim 850$  km in vicinity of local noon at  
487 longitudes around  $100^\circ$  E (red circles),  $0^\circ$  E (blue crosses), and  $80^\circ$  W (black diamonds) for various  
488 energy channels: (a)  $>30$  keV, (b)  $>100$  keV, and (c)  $>300$  keV. Vertical dashed and solid lines  
489 indicate latitudes of the maximum and inner edge of the outer radiation belt, respectively.

490  
491 Figure 4. Geographic latitude of the maximum of the outer radiation belt measured at height of  
492  $\sim 850$  km during geomagnetic quiet days around  $80^\circ$  W (a),  $0^\circ$  E (b), and  $100^\circ$  E (c) for electrons  
493 with energies of  $>30$  keV (red circles),  $>100$  keV (blue crosses), and  $>300$  keV (green triangles).  
494 Dashed curves of corresponding colors show the best linear fit of the latitudinal change of the  
495 maximum location with years (see Table 3). Solid black curves show the latitudinal change  
496 predicted by the IGRF model of corresponding epochs (see details in the text). The grey curve  
497 shows sunspot number (right axis).

498

499 Figure 5. The same as Figure 4 but for the inner edge of the outer radiation belt. [Coefficients of the](#)  
500 [best linear fit are presented in Table 4.](#)

501

502  
503  
504  
505  
506  
507  
508  
509  
510  
511  
512  
513  
514  
515  
516  
517  
518  
519  
520  
521  
522  
523

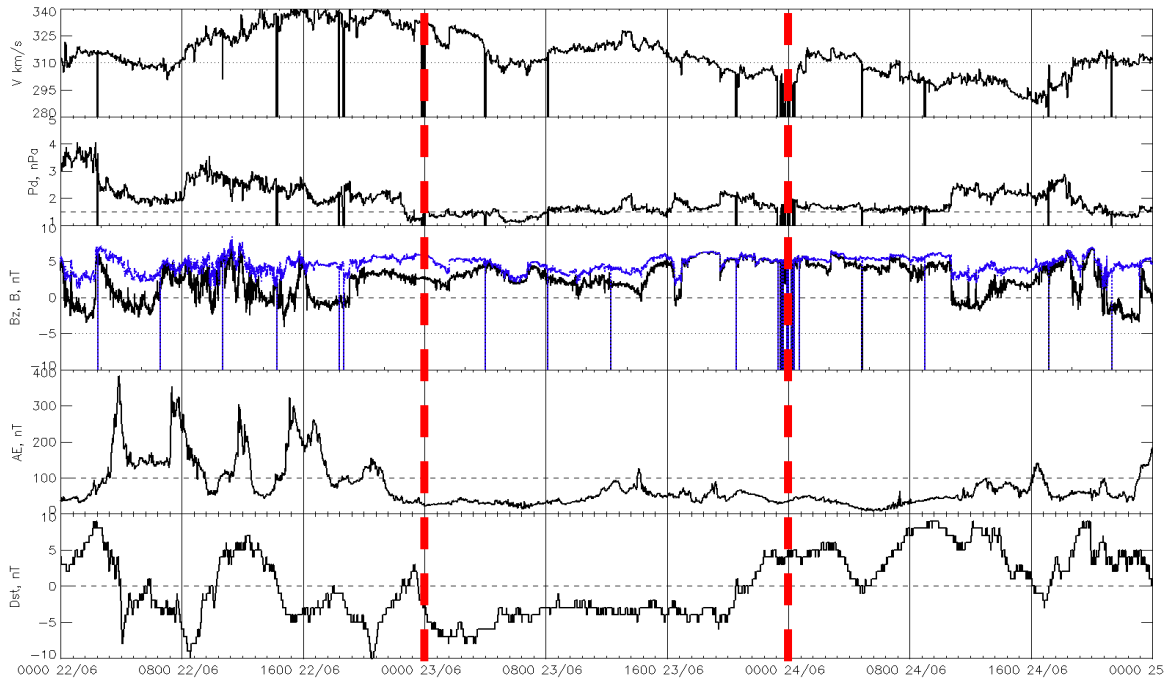

Figure 1. Solar wind and geomagnetic conditions on 22 to 24 June 2006 (from top to bottom): solar wind bulk velocity  $V$ ; solar wind dynamic pressure  $P_d$ ; interplanetary magnetic field magnitude  $B$  (blue dotted curve) and  $B_z$  component (black solid curve); auroral electrojet index  $AE$ ; storm-time  $Dst$  index. The day on 23 June (indicated by vertical red dashed lines) is very quite in the solar wind and geomagnetic parameters.



527  
528

529  
530

531  
532  
533

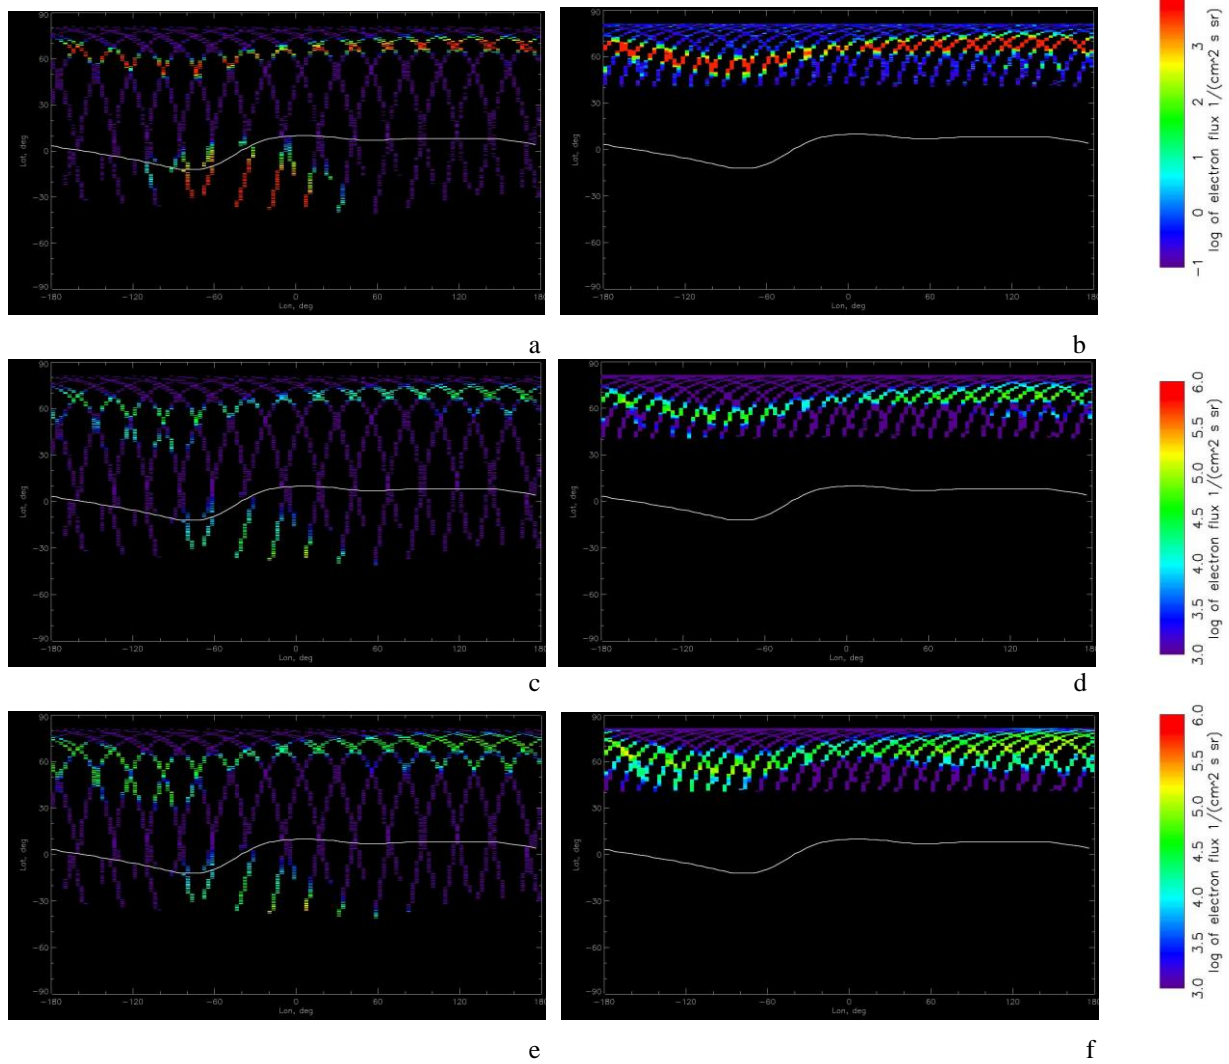

534 Figure 2. Geographic maps of energetic electron fluxes with energies >300 keV (a,b), >100 keV  
535 (c,d), >30 keV (e,f) and pitch angles of  $\sim 90^\circ$  observed by POES satellites at height of  $\sim 850$  km in 2  
536 hour vicinity of local noon (left column) on 23 June 2006 and (right column) on 2 June 2016. The  
537 solid wide curve indicates the geomagnetic equator. The outer and inner electron belts and a slot  
538 region between them are clearly seen (excepting of >100 keV electrons), respectively, at high and  
539 middle latitudes in the longitudinal range from  $\sim 90^\circ$  E to  $\sim 80^\circ$  W.  
540

541

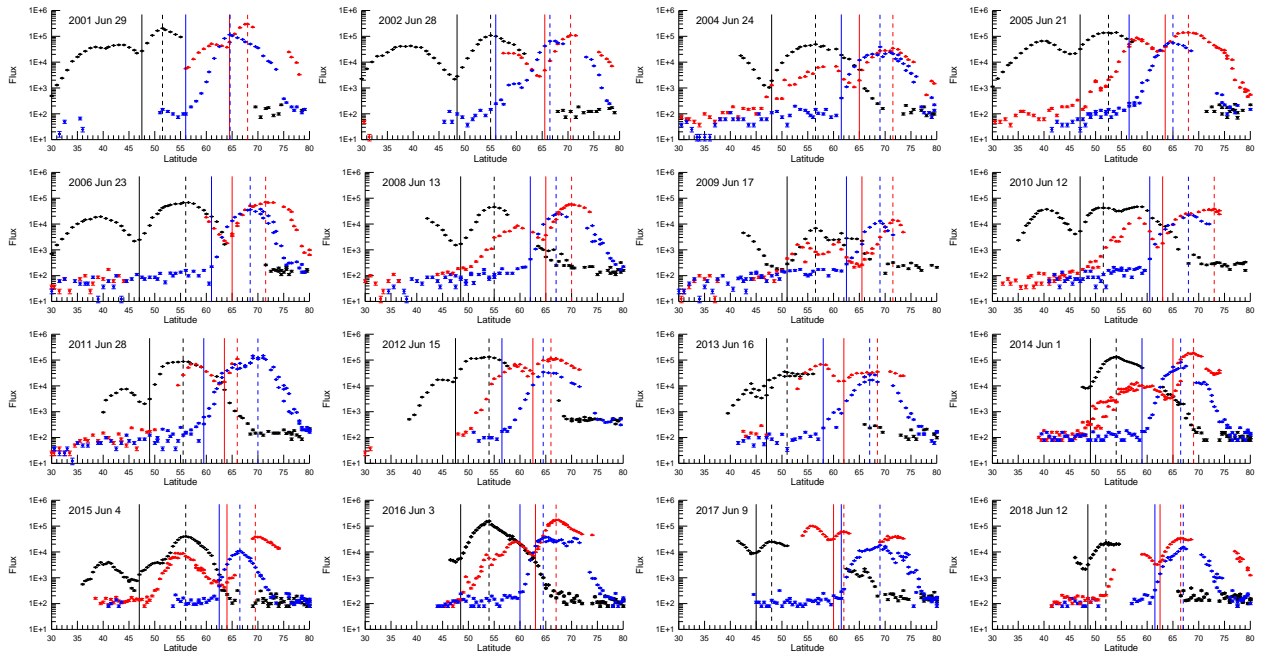

542

543

544

a

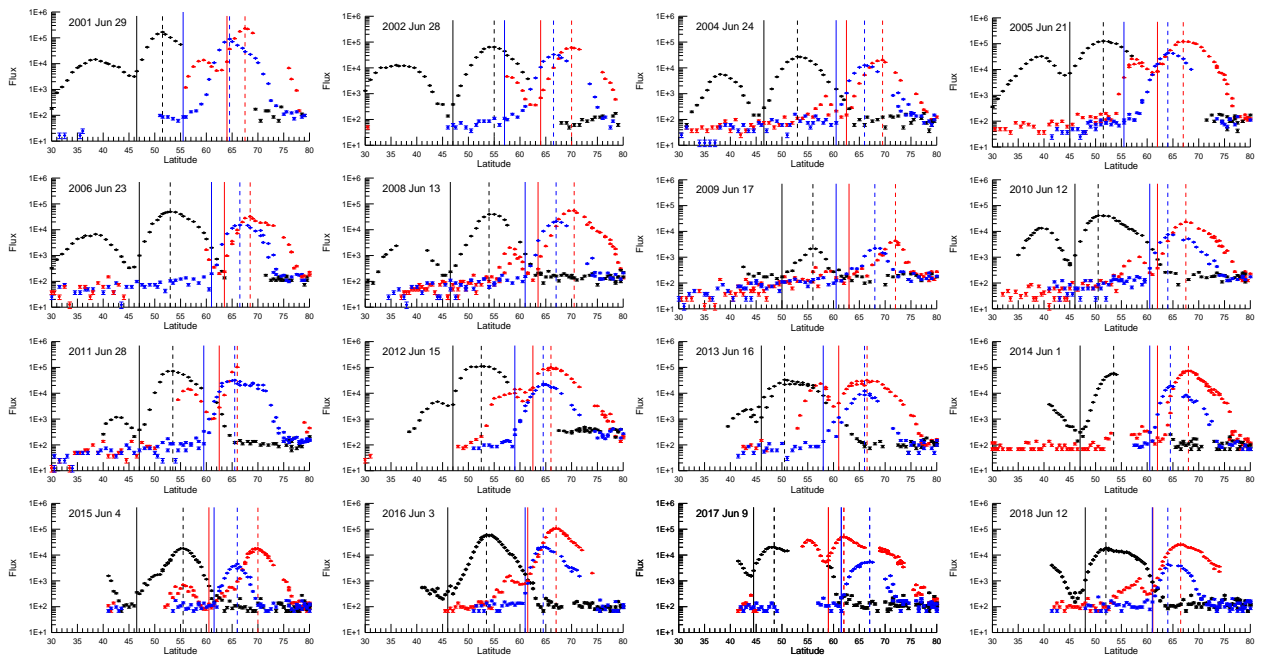

545

546

547

b

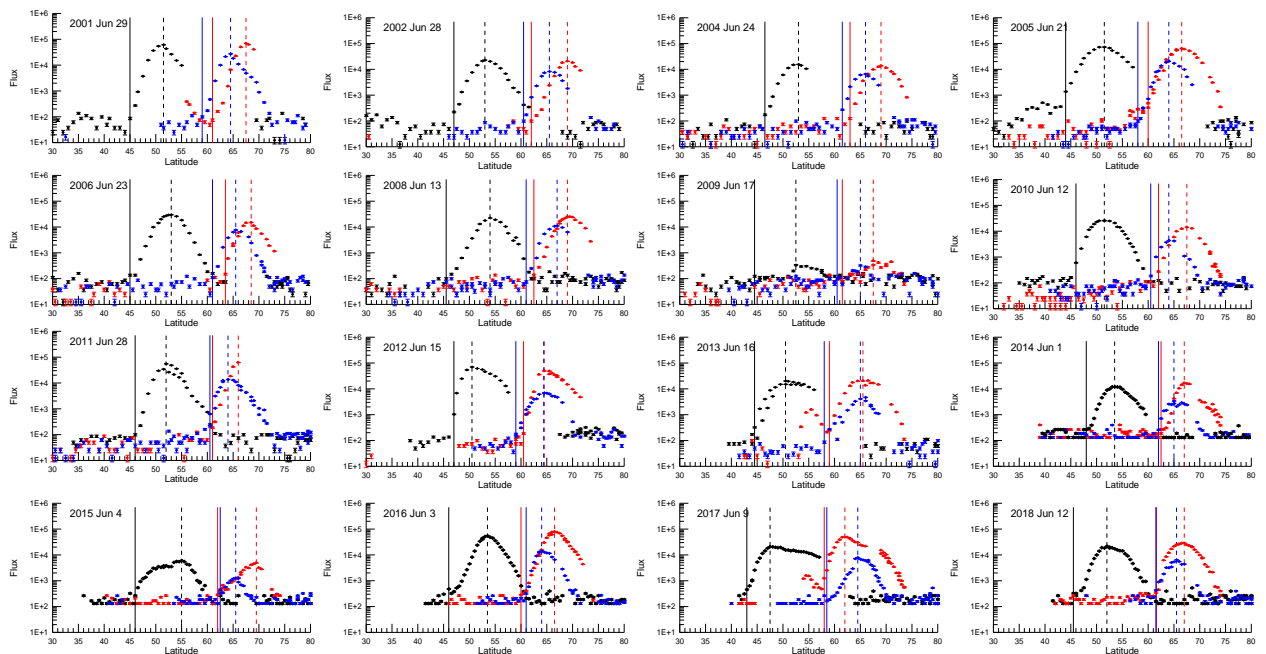

548

549

550

551

552

553

554

555

Figure 3. Latitudinal profiles of electron fluxes with pitch angles of  $\sim 90^\circ$  observed by POES satellites during quiet days in different years at height of  $\sim 850$  km in vicinity of local noon at longitudes around  $100^\circ\text{E}$  (red circles),  $0^\circ\text{E}$  (blue crosses), and  $80^\circ\text{W}$  (black diamonds) for various energy channels: (a)  $>30$  keV, (b)  $>100$  keV, and (c)  $>300$  keV. Vertical dashed and solid lines indicate latitudes of the maximum and inner edge of the outer radiation belt, respectively.

C

556

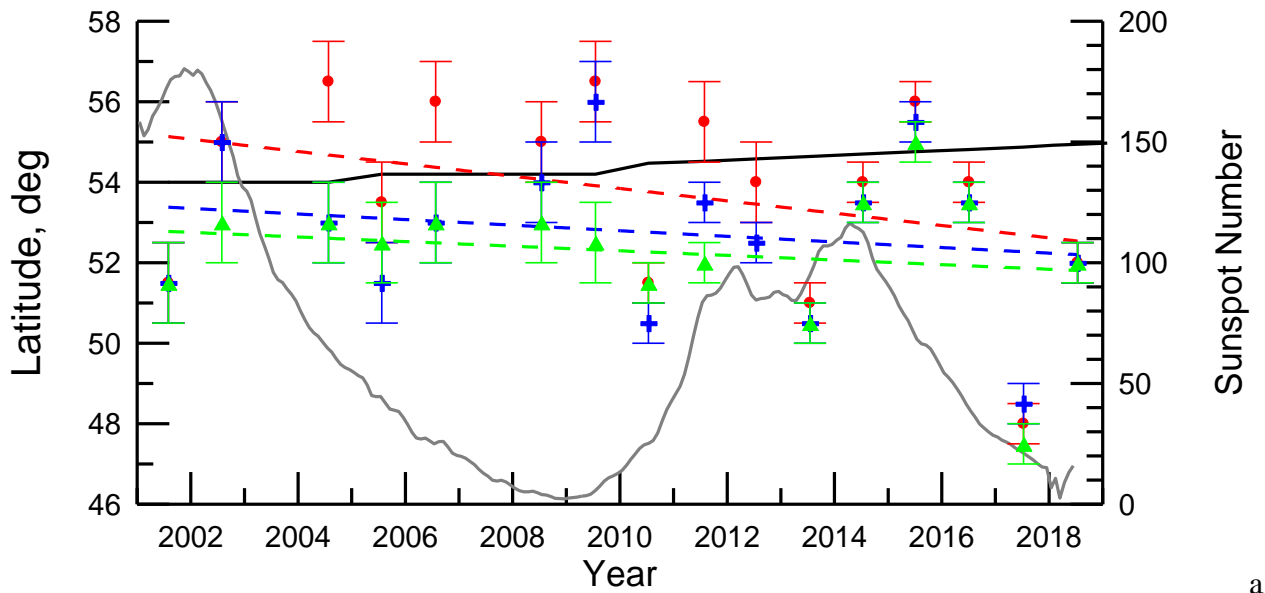

557

558

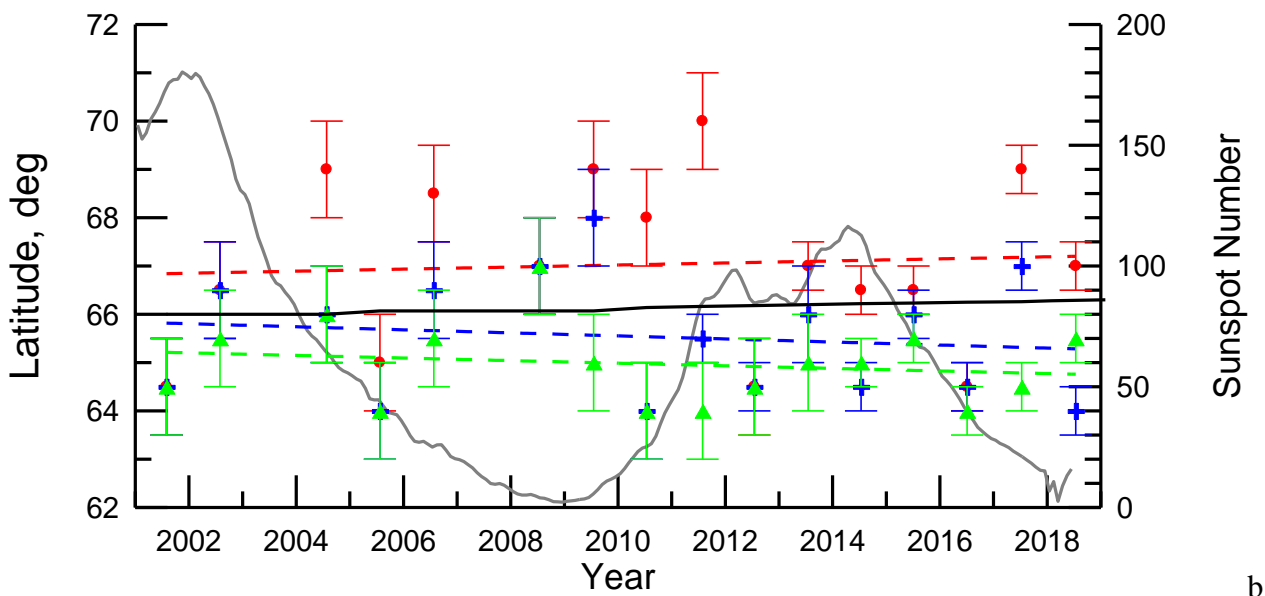

559

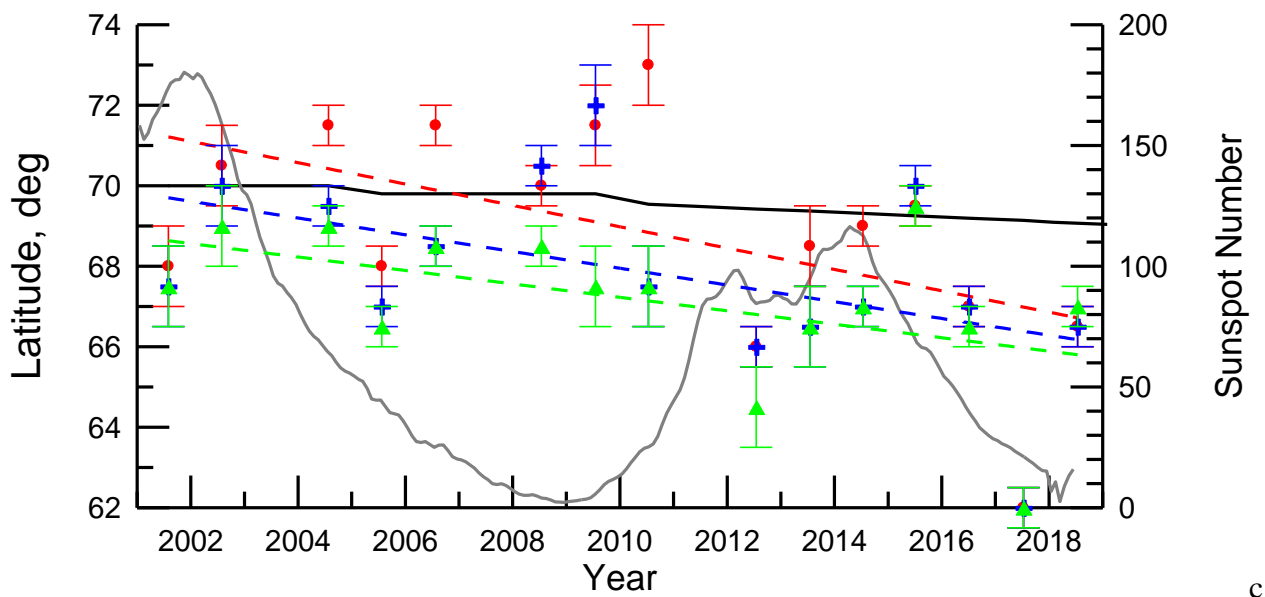

560

a

b

c

561  
562  
563  
564  
565  
566  
567  
568  
569

Figure 4. Geographic latitude of the maximum of the outer radiation belt measured at height of ~850 km during geomagnetic quiet days around 80°W (a), 0°E (b), and 100°E (c) for electrons with energies of >30 keV (red circles), >100 keV (blue crosses), and >300 keV (green triangles). Dashed curves of corresponding colors show the best linear fit of the latitudinal change of the maximum location with years (see Table 3). Solid black curves show the latitudinal change predicted by the IGRF model of corresponding epochs (see details in the text). The grey curve shows sunspot number (right axis).

570

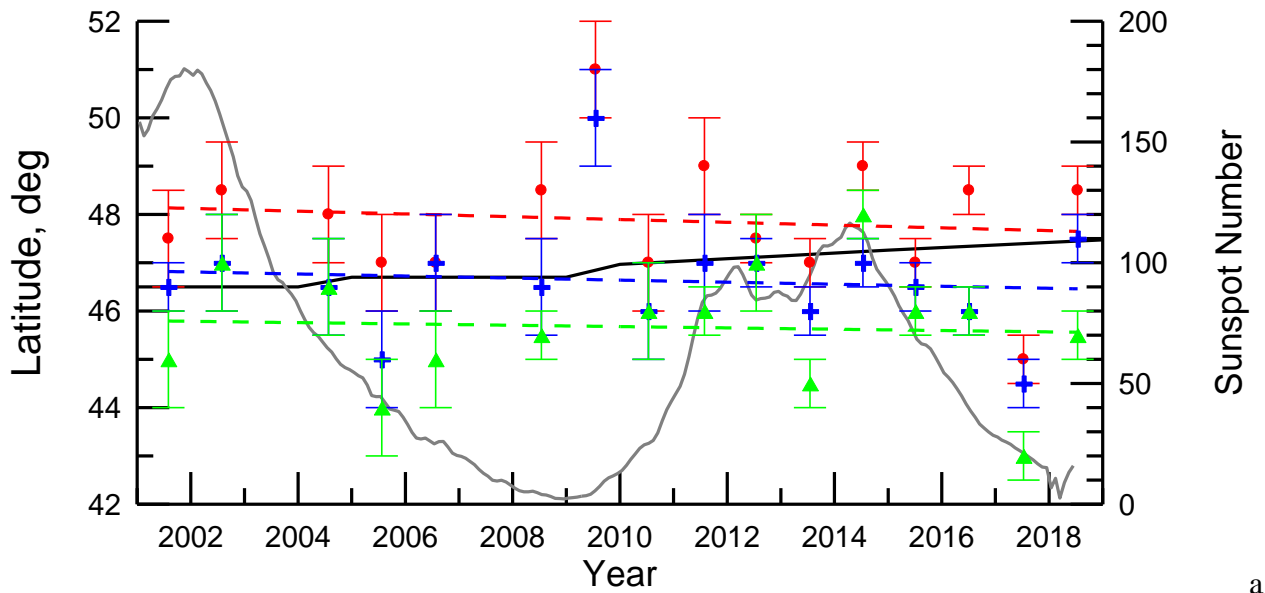

571

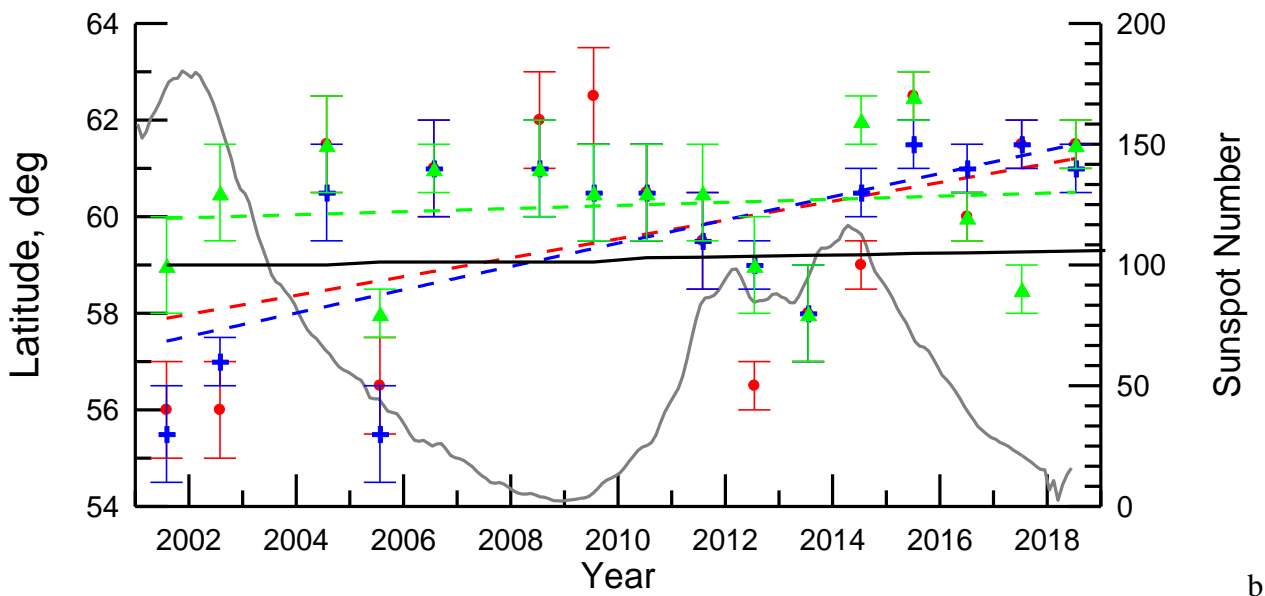

572

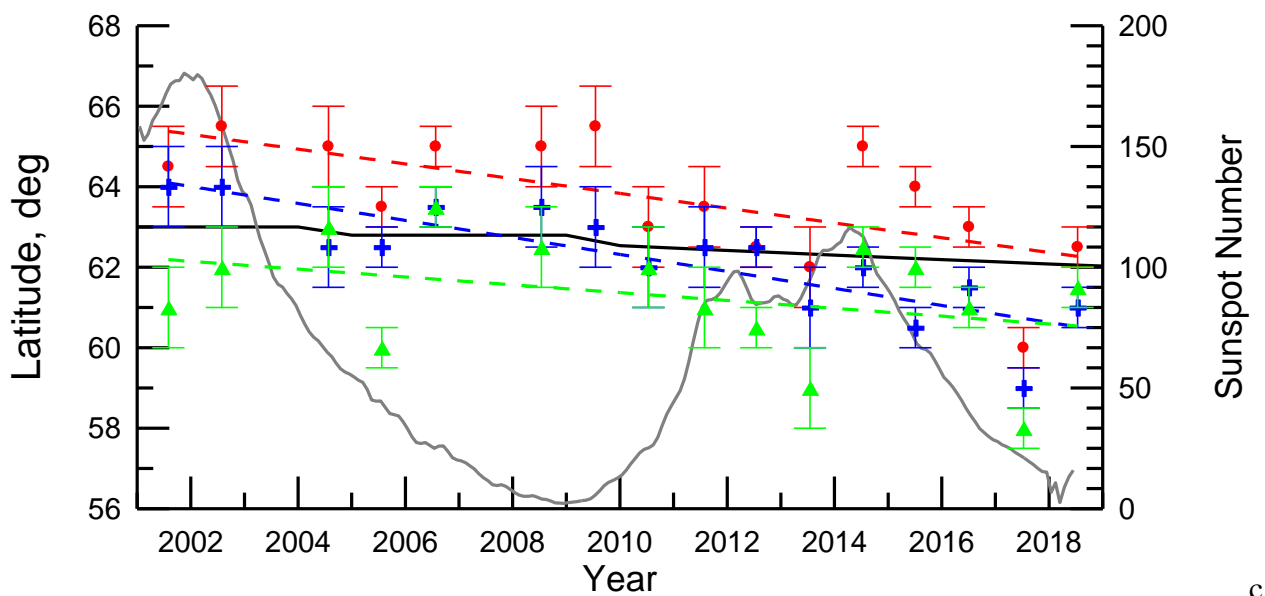

573

574

575 Figure 5. The same as Figure 4 but for the inner edge of the outer radiation belt. [Coefficients of the](#)  
576 [best linear fit are presented in Table 4.](#)  
577
